# Supplementary material for: Metabolome and transcriptome integration provide insights into petal color variation of Chrysanthemum indicum
Source: Research Square preprint supplement (doi:10.21203/rs.3.rs-8060656/v1), 2025-11-27
Supplement: Supplementary file 1 [file 714e261b9783e53cc217d244.docx]

**Supplementary information**


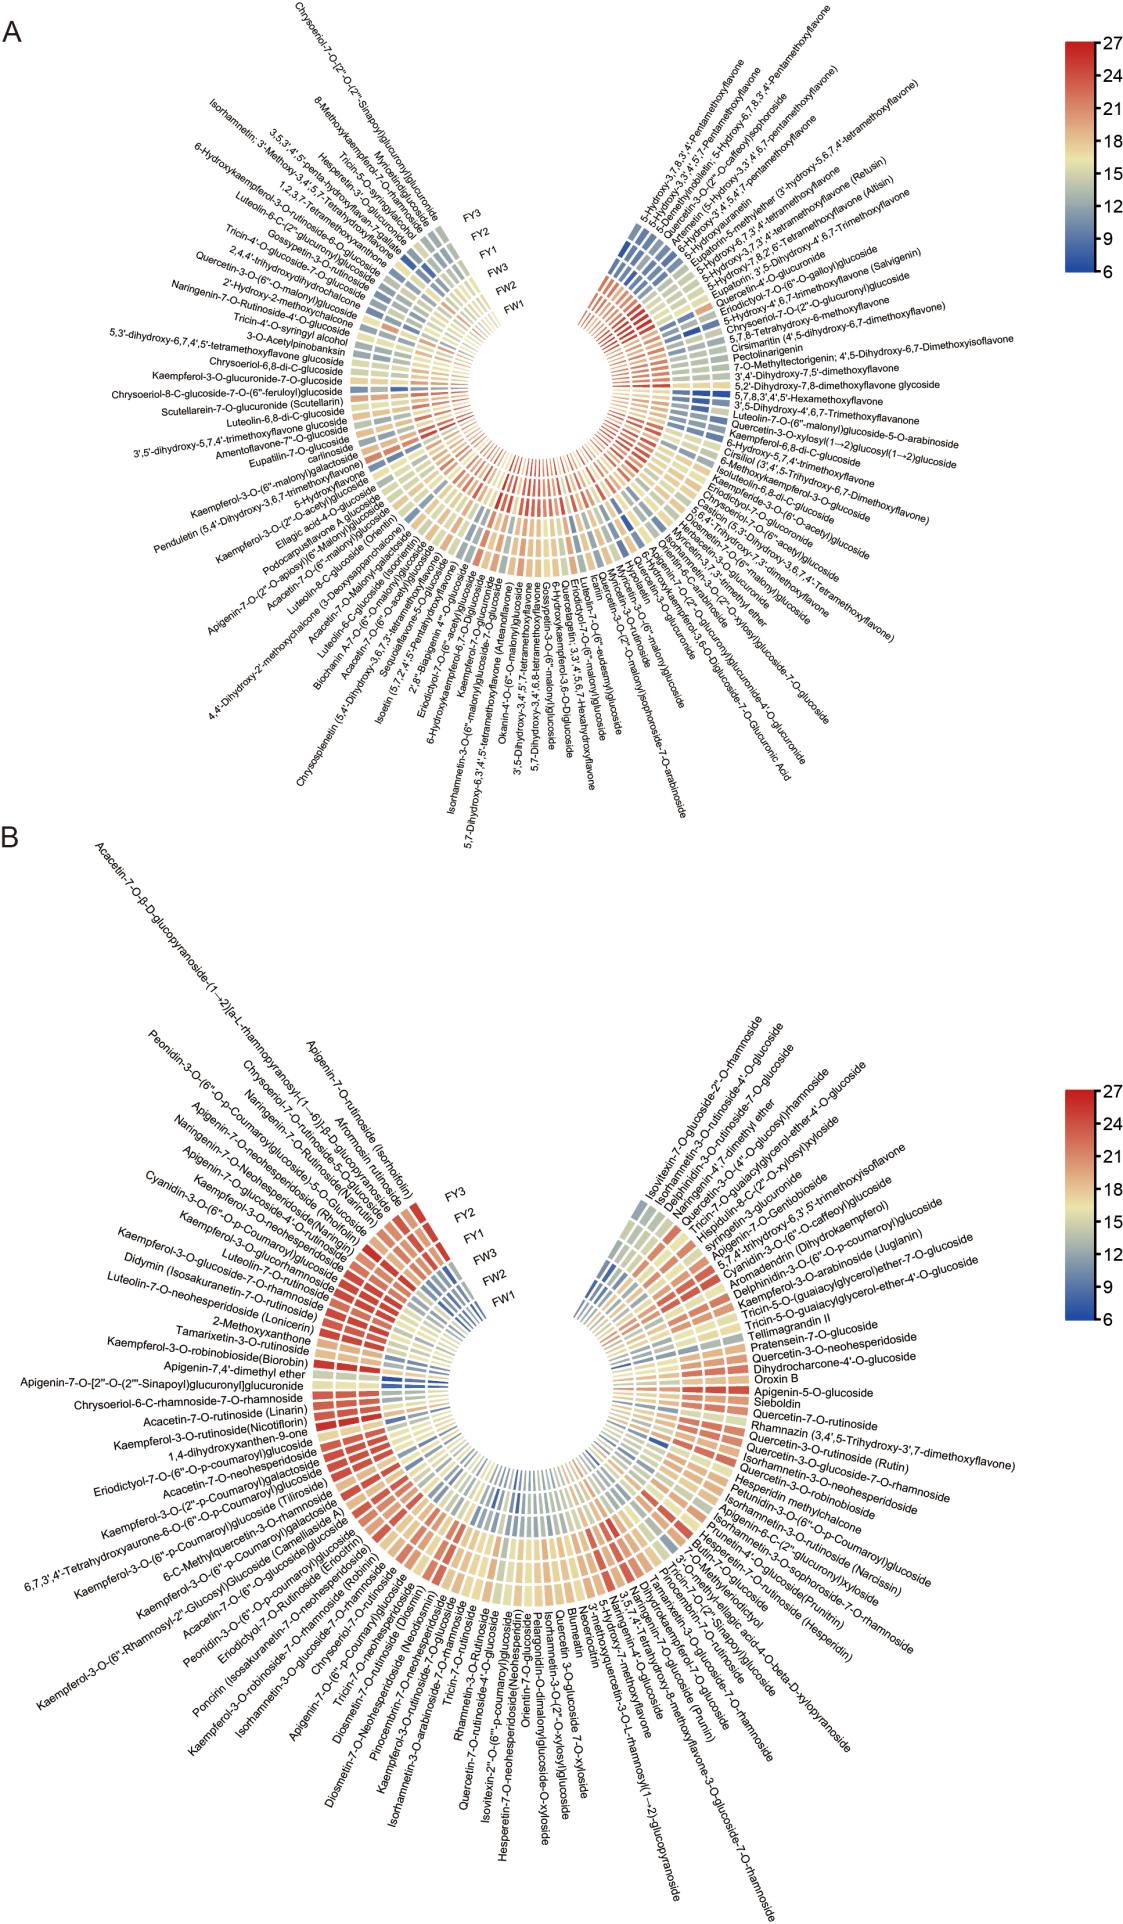


Fig. S1 Heat map of significantly different metabolites. The closer the color is red, the larger the value, and the closer the color is blue, the smaller the value.


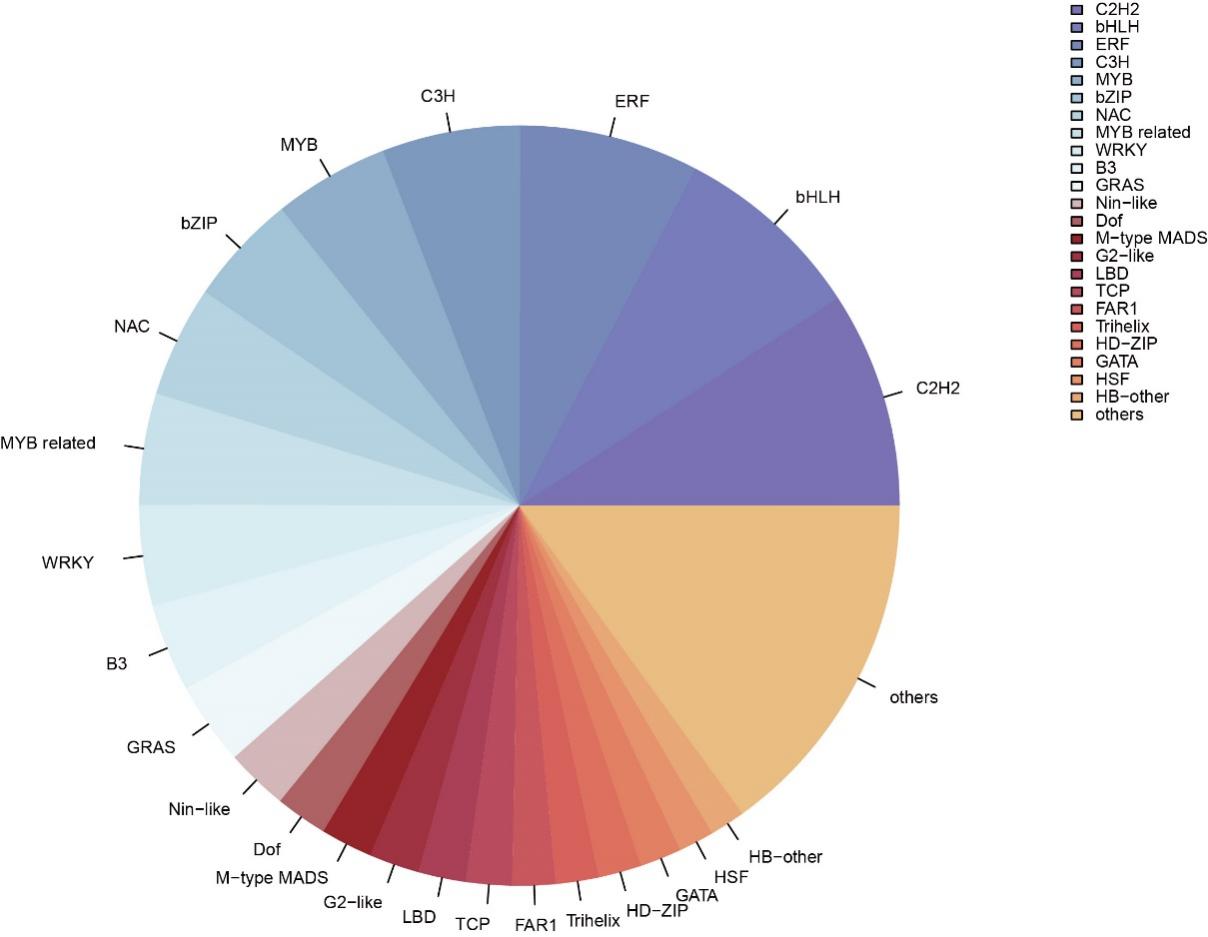


Fig. S2 TF classification and volume distribution of two flower-color *C. indicum*.

Table S1. The sequences of special primers used in this study.

| Gene_ID | Unigene_ID | forward primer | reverse primer |
| --- | --- | --- | --- |
| PAL | Unigene8641 | CTCTTCGTACCTCGCCTCAATGG | CCACCGTGTAAAGCCTTGTTTCTC |
| FLS | Unigene1005 | AAGATGAAGTGAAGCAAGCGTTGG | GGCATGGACATGGTGGGTAGTAG |
| 3AT | Unigene1414 | CGTTATGTGGAAGGTGATTCTGTGG | CATGTCCCAGAGGTGGTACAAGAG |
| 3GT | Unigene11790 | GCCTAGATCCATTGCGTACATTTCC | CGGGGTTTTGGTTTCTTCGAGTG |
| bZIP | Unigene22143 | GCACCTGTCCTACCACTACTACTAC | ACAGCAGCCATGATTGGTTGTTG |
| DBB | Unigene15601 | CAAGTGATGGTAAAGTCGGCTGATC | CTGGACCCGTTGTTGTTTGTATCG |
| GRAS | Unigene6402 | GTGGCAGTGGTGGTGGTGAG | CCTCTCAACTCGGTCCATTCCTTC |

Table S2. Metabolite composition in different tissues of two *C. indicum* varieties.

| Class II | Count |
| --- | --- |
| Flavones | 241 |
| Flavonols | 137 |
| Flavanones | 51 |
| Chalcones | 27 |
| Isoflavones | 26 |
| Other Flavonoids | 14 |
| Anthocyanidins | 10 |
| Biflavones | 12 |
| Tannin | 8 |
| Flavanols | 8 |
| Flavanonols | 7 |
| Aurones | 3 |

Table S3. Transcriptome sequencing data and quality statistics of two *C. indicum* varieties.

| Sample | Raw reads | Raw bases | Clean reads | Clean bases | Q20_rate | Q30_rate | GC_content |
| --- | --- | --- | --- | --- | --- | --- | --- |
| FW1 | 43,345,832 | 6,501,874,800 | 43,330,026 | 6,127,049,456 | 99.08% | 97.49% | 41.99% |
| FW2 | 43,370,914 | 6,505,637,100 | 43,355,662 | 5,920,460,788 | 99.15% | 97.61% | 42.38% |
| FW3 | 43,384,132 | 6,507,619,800 | 43,368,686 | 5,965,502,650 | 99.13% | 97.61% | 42.35% |
| FY1 | 43,396,130 | 6,509,419,500 | 43,380,332 | 6,051,547,346 | 99.24% | 97.89% | 41.98% |
| FY2 | 43,335,358 | 6,500,303,700 | 43,319,822 | 5,978,276,226 | 99.13% | 97.62% | 42.21% |
| FY3 | 43,353,792 | 6,503,068,800 | 43,337,854 | 6,023,494,540 | 99.11% | 97.59% | 42.28% |
