# Supplementary material for: Metabolome and transcriptome integration provide insights into petal color variation of Chrysanthemum indicum
Source: Research Square preprint supplement (doi:10.21203/rs.3.rs-8060656/v1), 2025-11-27
Supplement: Supplementary file 2 [file 7e696676bd3c3aabd8b2d8f9.xlsx]

## Sheet: Supplementary data 1
Supplementary data 1 fifty-four query protein sequences collected from literatures and GenBank defined as carotenoids and flavonoids-metabomic genes.
Protein ID	Species	Gene name	Enzyme name	References	Journal	Protein len	Pubmed/doi	Protein sequences
QBL54224.1	Scutellaria baicalensis	F3GT	flavonoid 3-O-glycosyltransferase	Highly Promiscuous Flavonoid 3- O-Glycosyltransferase from Scutellaria baicalensis	Org. Lett.	457 aa
AAA82888.1	Arabidopsis thaliana	4CL	4-coumarate:coenzyme A ligase	The Arabidopsis thaliana 4-coumarate:CoA ligase (4CL) gene: stress and developmentally regulated expression and nucleotide sequence of its cDNA	Plant Mol. Biol.	561 aa
NP_001345940.1	Glycine max	F3G2Gt	flavonol-3-O-glucoside/galactoside (1->6) glucosyltransferase	Cloning and characterization of soybean gene Fg1 encoding flavonol 3-O-glucoside/galactoside (1-->6) glucosyltransferase	Plant Mol Biol	462 aa
ALR72603.1	Chrysanthemum x morifolium	bHLH2	bHLH transcription factor 2	A Novel bHLH Transcription Factor Involved in Regulating Anthocyanin Biosynthesis in Chrysanthemums (Chrysanthemum morifolium Ramat.)	PLoS ONE	613 aa	26619181
UJP17034.1	Chrysanthemum x morifolium	CmMYB012	transcription factor MYB012	A novel transcription factor CmMYB012 inhibits flavone and anthocyanin biosynthesis in response to high temperatures in chrysanthemum	Hortic Res	211 aa	34848687
UJP17042.1	Chrysanthemum x morifolium	UFGT	flavonoid 3-O-glucosyltransferase	A novel transcription factor CmMYB012 inhibits flavone and anthocyanin biosynthesis in response to high temperatures in chrysanthemum	Hortic Res	468 aa	34848687
UJP17041.1	Chrysanthemum x morifolium	ANS	anthocyanidin synthase	A novel transcription factor CmMYB012 inhibits flavone and anthocyanin biosynthesis in response to high temperatures in chrysanthemum	Hortic Res	355 aa	34848687
UJP17040.1	Chrysanthemum x morifolium	DFR	dihydvroflavonol-4-reductase	A novel transcription factor CmMYB012 inhibits flavone and anthocyanin biosynthesis in response to high temperatures in chrysanthemum	Hortic Res	374 aa	34848687
UJP17039.1	Chrysanthemum x morifolium	FLS	flavonol synthase	A novel transcription factor CmMYB012 inhibits flavone and anthocyanin biosynthesis in response to high temperatures in chrysanthemum	Hortic Res	335 aa	34848687
UJP17038.1	Chrysanthemum x morifolium	FNS	flavone synthase	A novel transcription factor CmMYB012 inhibits flavone and anthocyanin biosynthesis in response to high temperatures in chrysanthemum	Hortic Res	513 aa	34848687
UJP17037.1	Chrysanthemum x morifolium	F3H	flavanone 3-hydroxylase	A novel transcription factor CmMYB012 inhibits flavone and anthocyanin biosynthesis in response to high temperatures in chrysanthemum	Hortic Res	364 aa	34848687
UJP17036.1	Chrysanthemum x morifolium	CHI	chalcone isomerase	A novel transcription factor CmMYB012 inhibits flavone and anthocyanin biosynthesis in response to high temperatures in chrysanthemum	Hortic Res	235 aa	34848687
UJP17035.1	Chrysanthemum x morifolium	CHS	chalcone synthase	A novel transcription factor CmMYB012 inhibits flavone and anthocyanin biosynthesis in response to high temperatures in chrysanthemum	Hortic Res	397 aa	34848687
AGX01487.1	Chrysanthemum x morifolium	F3′H	flavonoid 3′-hydroxylase	Flower Colour Modification of Chrysanthemum by Suppression of F3'H and Overexpression of the Exogenous Senecio cruentus F3'5'H Gene	PLoS ONE	508 aa	24250783
CAA73065.1	Helianthus annuus	PAL	phenylalanine ammonia lyase	Isolation of a complete PAL cDNA from sunflower (Accession No.Y12461)	Plant Physiol	667 aa
CAP08834.1	Arabidopsis thaliana	C4H	cinnamate-4-hydroxylase	Multilocus analysis of variation using a large empirical data set: phenylpropanoid pathway genes in Arabidopsis thaliana	Mol. Ecol.	505 aa	18221273
CAB78274.1	Arabidopsis thaliana	F3'5'H	flavonoid 3', 5'-hydroxylase			520 aa
BAE79547.1	Chrysanthemum x morifolium	DXS	1-deoxyxylulose 5-phosphate synthase	Regulation of carotenoid biosynthesis in petals and leaves of chrysanthemum (Chrysanthemum morifolium)	Physiol. Plantarum	669 aa	doi: 10.1111/j.1399-3054.2006.00761.x
BAE79548.1	Chrysanthemum x morifolium	DXR	1-deoxyxylulose 5-phosphate reductoisomerase	Regulation of carotenoid biosynthesis in petals and leaves of chrysanthemum (Chrysanthemum morifolium)	Physiol. Plantarum	487 aa	doi: 10.1111/j.1399-3054.2006.00761.x
BAE79551.1	Chrysanthemum x morifolium	IPI	IPP isomerase	Regulation of carotenoid biosynthesis in petals and leaves of chrysanthemum (Chrysanthemum morifolium)	Physiol. Plantarum	278 aa	doi: 10.1111/j.1399-3054.2006.00761.x
BAE79550.1	Chrysanthemum x morifolium	GGPS	GGPP synthase	Regulation of carotenoid biosynthesis in petals and leaves of chrysanthemum (Chrysanthemum morifolium)	Physiol. Plantarum	345 aa	doi: 10.1111/j.1399-3054.2006.00761.x
BAE79553.1	Chrysanthemum x morifolium	PSY	phytoene synthase	Regulation of carotenoid biosynthesis in petals and leaves of chrysanthemum (Chrysanthemum morifolium)	Physiol. Plantarum	324 aa	doi: 10.1111/j.1399-3054.2006.00761.x
BAE79552.1	Chrysanthemum x morifolium	PDS	phytoene desaturase	Regulation of carotenoid biosynthesis in petals and leaves of chrysanthemum (Chrysanthemum morifolium)	Physiol. Plantarum	572 aa	doi: 10.1111/j.1399-3054.2006.00761.x
BAE79555.1	Chrysanthemum x morifolium	ZDS	ζ-carotene desaturase	Regulation of carotenoid biosynthesis in petals and leaves of chrysanthemum (Chrysanthemum morifolium)	Physiol. Plantarum	584 aa	doi: 10.1111/j.1399-3054.2006.00761.x
BAE79546.1	Chrysanthemum x morifolium	CRTISO	carotenoid isomerase	Regulation of carotenoid biosynthesis in petals and leaves of chrysanthemum (Chrysanthemum morifolium)	Physiol. Plantarum	641 aa	doi: 10.1111/j.1399-3054.2006.00761.x
BAE79544.1	Chrysanthemum x morifolium	LCYB	lycopene β-cyclase	Regulation of carotenoid biosynthesis in petals and leaves of chrysanthemum (Chrysanthemum morifolium)	Physiol. Plantarum	498 aa	doi: 10.1111/j.1399-3054.2006.00761.x
BAE79549.1	Chrysanthemum x morifolium	LCYE	lycopene ε-cyclase	Regulation of carotenoid biosynthesis in petals and leaves of chrysanthemum (Chrysanthemum morifolium)	Physiol. Plantarum	448 aa	doi: 10.1111/j.1399-3054.2006.00761.x
BAE79545.1	Chrysanthemum x morifolium	CHYB	β-ring hydroxylase	Regulation of carotenoid biosynthesis in petals and leaves of chrysanthemum (Chrysanthemum morifolium)	Physiol. Plantarum	136 aa	doi: 10.1111/j.1399-3054.2006.00761.x
ASW34031.1	Chrysanthemum x morifolium	CHYE	ε-ring hydroxylase			548 aa
BAE79556.1	Chrysanthemum x morifolium	ZEP	zeaxanthin epoxidase	Regulation of carotenoid biosynthesis in petals and leaves of chrysanthemum (Chrysanthemum morifolium)	Physiol. Plantarum	658 aa	doi: 10.1111/j.1399-3054.2006.00761.x
BAE79554.1	Chrysanthemum x morifolium	VDE	violaxanthin deepoxidase	Regulation of carotenoid biosynthesis in petals and leaves of chrysanthemum (Chrysanthemum morifolium)	Physiol. Plantarum	480 aa	doi: 10.1111/j.1399-3054.2006.00761.x
Glyma.01G154900	Glycine max	CCD4	Carotenoid cleavage dioxygenase 4	GmCCD4 controls carotenoid content in soybeans	Plant Biotechnol J.	590 aa	33131209
Q9LRR7.1	Arabidopsis thaliana	NCED	9-cis-epoxycarotenoiddioxygenase	Regulation of drought tolerance by gene manipulation of 9-cis-epoxycarotenoid dioxygenase, a key enzyme in abscisic acid biosynthesis in Arabidopsis	Plant J	599 aa	11532178
K4C9E2.1	Solanum lycopersicum	NXS	Neoxanthin synthase	An alternative pathway to beta -carotene formation in plant chromoplasts discovered by map-based cloning of beta and old-gold color mutations in tomato	Proc Natl Acad Sci U S A	498 aa	10995464
Contig234_G00037.t1	Chrysanthemum indicum	CiCOMT10	flavonoid 4'-O-methyltransferases	Genomic insights into the evolution of flavonoid biosynthesis and O-methyltransferase and glucosyltransferase in Chrysanthemum indicum	Cell Reports	366 aa	https://doi.org/10.1016/j.celrep.2024.113725
Contig11_G00169.t1	Chrysanthemum indicum	CiUGT11	flavonoid 7-O-glucosyltransferases	Genomic insights into the evolution of flavonoid biosynthesis and O-methyltransferase and glucosyltransferase in Chrysanthemum indicum	Cell Reports	472 aa	https://doi.org/10.1016/j.celrep.2024.113725
UYE98987.1	Chrysanthemum indicum	UGT79A20	1,6RhaT	Rhamnosyltransferases Involved in the Biosynthesis of Flavone Rutinosides in Chrysanthemum Species.	Plant Physiol	469 aa	https://doi.org/10.1093/plphys/kiac371
UYE98988.1	Chrysanthemum x morifolium	UGT79A21	1,6RhaT	Rhamnosyltransferases Involved in the Biosynthesis of Flavone Rutinosides in Chrysanthemum Species.	Plant Physiol	469 aa	https://doi.org/10.1093/plphys/kiac371
UYE98989.1	Chrysanthemum indicum	UGT79A22	1,6RhaT	Rhamnosyltransferases Involved in the Biosynthesis of Flavone Rutinosides in Chrysanthemum Species.	Plant Physiol	469 aa	https://doi.org/10.1093/plphys/kiac371
UYE98990.1	Chrysanthemum indicum var. edule	UGT79A23	1,6RhaT	Rhamnosyltransferases Involved in the Biosynthesis of Flavone Rutinosides in Chrysanthemum Species.	Plant Physiol	469 aa	https://doi.org/10.1093/plphys/kiac371
AT3G53130	Arabidopsis thaliana	CYP97C1	carotenoid epsilon hydroxylase	The Arabidopsis LUT1 locus encodes a member of the cytochrome p450 family that is required for carotenoid epsilon-ring hydroxylation activity.	Proc Natl Acad Sci U S A	539 aa	DOI:10.1073/pnas.2237237100
AT1G31800	Arabidopsis thaliana	CYP97A3	β-ring hydroxylase	Defining the primary route for lutein synthesis in plants: the role of Arabidopsis carotenoid beta-ring hydroxylase CYP97A3.	Proc Natl Acad Sci U S A	595 aa	DOI:10.1073/pnas.0511207103
AT1G10830	Arabidopsis thaliana	Z-ISO	zeta-carotene isomerase	Isolation and characterization of the Z-ISO gene encoding a missing component of carotenoid biosynthesis in plants	Plant Physiol	367 aa	DOI:10.1104/pp.110.153916
AT4G25700	Arabidopsis thaliana	BCH1	beta-carotene 3-hydroxylase	Cloning and functional analysis of the beta-carotene hydroxylase of Arabidopsis thaliana	J Biol Chem	310 aa	DOI:10.1074/jbc.271.40.24349
AT5G52570	Arabidopsis thaliana	BCH2	beta-carotene 3-hydroxylase	Cloning and functional analysis of the beta-carotene hydroxylase of Arabidopsis thaliana	J Biol Chem	303 aa	DOI:10.1074/jbc.271.40.24349
AT3G63520	Arabidopsis thaliana	AtCCD1	Carotenoid cleavage dioxygenase	Identification and characterization of a unique cysteine residue proximal to the catalytic site of Arabidopsis thaliana carotenoid cleavage enzyme 1	Biochem Cell Biol	538 aa	18523487
AT4G19170	Arabidopsis thaliana	AtCCD4	Carotenoid cleavage dioxygenase			595 aa
AT2G44990	Arabidopsis thaliana	AtCCD7	Carotenoid cleavage dioxygenase			618 aa
AT4G32810	Arabidopsis thaliana	AtCCD8	Carotenoid cleavage dioxygenase			570 aa
AT4G18350	Arabidopsis thaliana	AtNCED2	9-cis-epoxycarotenoiddioxygenase			583 aa
AT3G14440	Arabidopsis thaliana	AtNCED3	9-cis-epoxycarotenoiddioxygenase			599 aa
AT1G30100	Arabidopsis thaliana	AtNCED5	9-cis-epoxycarotenoiddioxygenase			589 aa
AT3G24220	Arabidopsis thaliana	AtNCED6	9-cis-epoxycarotenoiddioxygenase			577 aa
AT1G78390	Arabidopsis thaliana	AtNCED9	9-cis-epoxycarotenoiddioxygenase			657 aa

## Sheet: Supplementary data 2
Supplementary data 2 The content of Carotenoids in white and yellow-rayed of C. indicum varieties.
Index	Compounds	FW1	FW2	FW3	FY1	FY2	FY3	Class	FW_vs_FY_Fold_Change	FW_vs_FY_Log2FC	FW_vs_FY_Type
Carotenoid_01	α-carotene	0.689908	1.05249	0.819904	0	0	0	carotenes	inf	inf	up
Carotenoid_04	β-carotene	5.79113	10.145	1.47542	10.3933	9.72882	10.0723	carotenes
Carotenoid_05	phytofluene	0.783048	0.840532	0.492411	1.01231	1.11075	0.846297	carotenes
Carotenoid_06	(E/Z)-phytoene	0	0	0	0	2.19314	2.58734	carotenes	0	-inf	down
Carotenoid_07	ε-carotene	0.405069	0.553822	0.47896	0.629269	0.485601	0.536915	carotenes
Carotenoid_09	lutein caprate	0.70542	0.793133	0.696254	1.61895	1.22375	1.1456	xanthophylls
Carotenoid_10	lutein laurate	0	0	0	0.937092	0.895534	0.771839	xanthophylls	0	-inf	down
Carotenoid_11	lutein myristate	2.17386	3.25927	1.47268	2.75156	2.3725	2.9028	xanthophylls
Carotenoid_12	lutein palmitate	47.42	51.955	27.4843	49.4583	40.1813	41.8761	xanthophylls
Carotenoid_13	lutein stearate	1.54374	2.05056	1.86396	2.8519	1.69992	2.14334	xanthophylls
Carotenoid_14	5,6epoxy-luttein dilaurate	1.83444	2.86126	0	0.94654	1.0382	0.981866	xanthophylls
Carotenoid_15	lutein dilaurate	4.61902	5.60895	5.10812	5.49829	5.22363	4.38519	xanthophylls
Carotenoid_17	lutein dimyristate	7.71978	9.55196	5.1216	11.9792	10.7981	11.0158	xanthophylls
Carotenoid_18	lutein dipalmitate	0	29.6081	20.7523	42.2658	34.6908	33.7044	xanthophylls	0.455087	-1.13578	down
Carotenoid_19	lutein distearate	19.0962	18.0811	23.7916	0	24.5993	27.2703	xanthophylls
Carotenoid_20	lutein dioleate	4.80301	6.18908	5.43117	5.2188	6.35345	5.13409	xanthophylls
Carotenoid_21	lutein oleate	10.5872	10.8105	12.6762	15.8841	11.2573	10.9889	xanthophylls
Carotenoid_22	neochrome palmitate	1.92587	1.83054	0.89315	1.91215	2.05688	2.10946	xanthophylls
Carotenoid_25	rubixanthin myristate	0	0.107456	0.108834	0	0	0	xanthophylls	inf	inf	up
Carotenoid_27	violaxanthin dibutyrate	0.0376348	0.0424157	0.0501352	0.0436528	0.0530708	0.0492174	xanthophylls
Carotenoid_28	violaxanthin laurate	0.376879	0.574816	0.298969	0.673943	0.64609	0.712375	xanthophylls
Carotenoid_29	violaxanthin myristate	11.2377	9.8357	4.74383	12.7402	14.4664	12.8803	xanthophylls
Carotenoid_30	violaxanthin palmitate	11.0444	7.79979	7.55913	18.5046	14.4067	14.4212	xanthophylls
Carotenoid_32	violaxanthin dilaurate	3.86848	2.44617	3.12938	3.87004	2.82507	2.91394	xanthophylls
Carotenoid_33	violaxanthin-myristate-caprate	5.11157	3.78177	4.92218	6.75725	4.78626	5.03474	xanthophylls
Carotenoid_34	violaxanthin-myristate-laurate	0.614228	0.63355	0.539606	0.997554	1.07863	1.00162	xanthophylls
Carotenoid_35	violaxanthin dimyristate	0.25089	0.310293	0.24997	0.407595	0.366639	0.326409	xanthophylls
Carotenoid_36	violaxanthin-myristate-palmitate	0	0.288925	0.116426	0.442714	0.548626	0.604532	xanthophylls	0.253999	-1.9771	down
Carotenoid_37	violaxanthin dipalmitate	0	0.286089	0	0.44269	0.608483	0.677269	xanthophylls	0.165518	-2.59494	down
Carotenoid_38	violaxanthin-myristate-oleate	0.108844	0.204428	0.1334	0.118025	0.11334	0.111704	xanthophylls
Carotenoid_39	violaxanthin dioleate	0	0	0	0	0	0.0322735	xanthophylls
Carotenoid_42	zeaxanthin-caprate-laurate	0	0	0	0	0	0.029875	xanthophylls
Carotenoid_44	zeaxanthin-laurate-myristate	0	0	0	0.0334174	0.0404737	0	xanthophylls	0	-inf	down
Carotenoid_46	zeaxanthin-laurate-palmitate	0.0741164	0.0754969	0.0787706	0.13102	0.116824	0.154088	xanthophylls
Carotenoid_47	zeaxanthin-myristate-palmitate	0	0	0.122558	0.248085	0	0	xanthophylls
Carotenoid_48	zeaxanthin dipalmitate	23.7365	22.6447	29.1324	46.2469	31.5968	28.8682	xanthophylls
Carotenoid_49	zeaxanthin-palmitate-stearate	1.13412	1.37145	1.76371	2.85593	2.0442	2.03586	xanthophylls
Carotenoid_55	antheraxanthin	5.60299	5.90438	2.17658	4.18284	5.4996	6.06741	xanthophylls
Carotenoid_56	zeaxanthin	4.04022	6.72664	0.935229	5.43534	7.31502	7.29986	xanthophylls
Carotenoid_57	violaxanthin	9.18751	9.01163	4.79455	8.03932	11.0537	10.3733	xanthophylls
Carotenoid_58	neoxanthin	3.1591	7.19029	0.854384	5.0871	5.26645	5.1128	xanthophylls
Carotenoid_59	lutein	68.4751	100.202	31.6378	72.4138	73.9887	77.788	xanthophylls
Carotenoid_60	β-cryptoxanthin	2.46063	2.41607	1.49504	2.66754	2.47166	2.67582	xanthophylls
Carotenoid_61	astaxanthin	0.0691637	0.125691	0.0435356	0.0384593	0.0841163	0.089437	xanthophylls
Carotenoid_62	8'-apo-beta-carotenal	0.0190373	0.0161985	0.0215199	0.0178894	0.0178068	0.0154178	xanthophylls
Carotenoid_63	capsanthin	0	0	0.0972091	0	0	0	xanthophylls
Carotenoid_64	α-cryptoxanthin	4.38993	4.73934	2.88799	5.98444	4.91505	5.16264	xanthophylls
Carotenoid_66	canthaxanthin	0.014343	0.013954	0.0142875	0.0136442	0.013901	0.0138846	xanthophylls
Carotenoid_67	echinenone	0.0162036	0.0141242	0.0180484	0.00983029	0.0112049	0.00953622	xanthophylls
Carotenoid_68	β-citraurin	0.00400906	0.00424175	0	0.00378531	0.0041069	0.00362754	xanthophylls

## Sheet: Supplementary data 3
Supplementary data 3 The information of candidate carotenoids and flavonoids-metabomic genes in C. indicum.
query id	subject id	% identity	alignment length	% query coverage per subject	mismatches	gap opens	q. start	q. end	s. start	s. end	evalue	bit score	Gene name
4CL_AAA82888.1	Unigene10480	70.295	542	96	151	4	22	561	10	543	0	787	Ci4CL1
4CL_AAA82888.1	Unigene7490	80.055	361	64	70	2	202	561	2	361	0	564	Ci4CL2
4CL_AAA82888.1	Unigene19863	63.158	399	70	135	4	131	525	2	392	4.39e-177	506	Ci4CL3
bHLH2_ALR72603.1	Unigene4873	95.014	361	59	18	0	1	361	1	361	0	728	CibHLH2
C4H_CAP08834.1	Unigene5986	87.786	262	52	32	0	1	262	1	262	6.75e-164	464	CiC4H
CHI_UJP17036.1	Unigene46082	50.909	165	70	81	0	1	165	1	165	1.02e-54	173	CiCHI
CHS_UJP17035.1	Unigene22943	83.979	387	97	62	0	4	390	1	387	0	691	CiCHS1
CHS_UJP17035.1	Unigene13745	99.701	334	84	1	0	64	397	6	339	0	689	CiCHS2
CHS_UJP17035.1	Unigene16367	79.293	396	99	81	1	1	396	1	395	0	677	CiCHS3
CHS_UJP17035.1	Unigene6652	93.958	331	83	20	0	67	397	1	331	0	652	CiCHS4
CHS_UJP17035.1	Unigene19517	74.873	394	99	99	0	4	397	7	400	0	636	CiCHS5
CHS_UJP17035.1	Unigene18617	74.242	396	99	102	0	1	396	1	396	0	633	CiCHS6
CHS_UJP17035.1	Unigene15798	74.619	394	99	100	0	1	394	1	394	0	621	CiCHS7
CHS_UJP17035.1	Unigene24083	74.185	368	93	95	0	23	390	1	368	0	592	CiCHS8
DFR_UJP17040.1	Unigene17077	98.936	282	75	2	1	1	281	10	291	0	575	CiDFR
F3'5'H_CAB78274.1	Unigene9405	52.894	501	96	225	4	23	519	27	520	0	546	CiF3'5'H
F3'H_AGX01487.1	Unigene4236	97.279	294	58	8	0	1	294	1	294	0	579	CiF3'H
F3H_UJP17037.1	Unigene11894	99.257	269	74	2	0	1	269	1	269	0	561	CiF3H
FLS_UJP17039.1	Unigene1005	99.403	335	100	2	0	1	335	1	335	0	677	CiFLS
FNS_UJP17038.1	Unigene7311	98.054	514	100	9	1	1	513	1	514	0	1034	CiFNS1
FNS_UJP17038.1	Unigene16312	71.569	510	99	139	3	6	513	1	506	0	757	CiFNS2
FNS_UJP17038.1	Unigene45195	51.724	261	51	123	1	120	380	1	258	1.02e-90	278	CiFNS3
MYB012_UJP17034.1	Unigene25046	79.832	119	56	24	0	1	119	1	119	5.13e-71	219	CiMYB012-1
MYB012_UJP17034.1	Unigene23716	70.149	134	64	40	0	1	134	1	134	2.09e-69	214	CiMYB012-2
MYB012_UJP17034.1	Unigene26602	67.241	116	55	38	0	1	116	1	116	1.85e-58	186	CiMYB012-3
MYB012_UJP17034.1	Unigene60401	69.828	116	55	35	0	1	116	1	116	1.82e-59	185	CiMYB012-4
MYB012_UJP17034.1	Unigene24551	67.241	116	55	38	0	1	116	1	116	2.29e-57	185	CiMYB012-5
MYB012_UJP17034.1	Unigene23500	61.538	130	62	50	0	1	130	1	130	1.56e-58	184	CiMYB012-6
MYB012_UJP17034.1	Unigene29223	54.362	149	71	68	0	1	149	1	149	4.53e-57	182	CiMYB012-7
MYB012_UJP17034.1	Unigene25694	65.517	116	55	40	0	1	116	1	116	5.72e-56	181	CiMYB012-8
MYB012_UJP17034.1	Unigene30208	55.689	167	78	65	4	1	164	1	161	5.81e-56	180	CiMYB012-9
MYB012_UJP17034.1	Unigene25492	61.24	129	61	50	0	1	129	1	129	1.01e-54	177	CiMYB012-10
MYB012_UJP17034.1	Unigene18662	65.517	116	55	40	0	1	116	1	116	4.4e-54	176	CiMYB012-11
MYB012_UJP17034.1	Unigene26931	62.931	116	55	43	0	1	116	1	116	8.34e-54	175	CiMYB012-12
MYB012_UJP17034.1	Unigene36137	65.217	115	55	40	0	1	115	1	115	3.1e-54	174	CiMYB012-13
MYB012_UJP17034.1	Unigene31771	62.931	116	55	43	0	1	116	1	116	8.63e-54	174	CiMYB012-14
MYB012_UJP17034.1	Unigene14730	59.483	116	55	47	0	1	116	1	116	3.58e-52	171	CiMYB012-15
MYB012_UJP17034.1	Unigene37277	62.069	116	55	44	0	1	116	4	119	2.37e-52	168	CiMYB012-16
MYB012_UJP17034.1	Unigene20867	61.207	116	55	45	0	1	116	1	116	1.02e-50	166	CiMYB012-17
MYB012_UJP17034.1	Unigene24928	59.167	120	57	49	0	1	120	1	120	2.77e-51	165	CiMYB012-18
MYB012_UJP17034.1	Unigene24336	60.169	118	56	47	0	1	118	2	119	3.09e-45	153	CiMYB012-19
MYB012_UJP17034.1	Unigene27828	54.701	117	55	52	1	1	116	1	117	8.25e-46	152	CiMYB012-20
MYB012_UJP17034.1	Unigene22999	54.701	117	55	52	1	1	116	1	117	1.58e-44	151	CiMYB012-21
MYB012_UJP17034.1	Unigene27327	53.846	117	55	53	1	1	116	1	117	5.53e-44	149	CiMYB012-22
MYB012_UJP17034.1	Unigene26013	55.455	110	52	48	1	1	109	1	110	5.69e-43	147	CiMYB012-23
MYB012_UJP17034.1	Unigene23385	51.938	129	59	58	1	11	135	29	157	1.25e-42	145	CiMYB012-24
MYB012_UJP17034.1	Unigene14541	51.938	129	57	53	1	8	127	26	154	2.55e-42	145	CiMYB012-25
MYB012_UJP17034.1	Unigene35609	58.261	115	54	47	1	3	116	2	116	8.93e-43	144	CiMYB012-26
MYB012_UJP17034.1	Unigene25661	54.054	111	53	51	0	6	116	8	118	1.53e-41	144	CiMYB012-27
MYB012_UJP17034.1	Unigene71758	55.856	111	52	48	1	1	110	1	111	1.35e-43	143	CiMYB012-28
MYB012_UJP17034.1	Unigene38138	54.783	115	53	49	1	5	116	4	118	1.44e-41	139	CiMYB012-29
MYB012_UJP17034.1	Unigene28755	54.098	122	58	56	0	12	133	29	150	5.15e-37	131	CiMYB012-30
MYB012_UJP17034.1	Unigene39516	56.481	108	51	47	0	8	115	5	112	6.34e-35	124	CiMYB012-31
F3G2Gt_NP_001345940.1	Unigene13845	50.597	419	88	181	6	57	462	2	407	6.2e-148	428	CiF3G2Gt1
F3G2Gt_NP_001345940.1	Unigene27076	52.507	379	81	168	5	7	378	15	388	9.62e-138	401	CiF3G2Gt2
PAL_CAA73065.1	Unigene8641	91.853	626	94	50	1	40	665	1	625	0	1185	CiPAL1
PAL_CAA73065.1	Unigene5810	82.648	657	99	113	1	8	664	7	662	0	1141	CiPAL2
UFGT_UJP17042.1	Unigene11790	99.614	259	55	1	0	210	468	1	259	0	533	CiUFGT
CCD4_Glyma.01G154900	Unigene10291	64.168	547	92	189	4	42	584	56	599	0	738	CiCCD4-1
CCD4_Glyma.01G154900	Unigene3822	66.525	469	79	143	5	9	474	23	480	0	649	CiCCD4-3
CCD4_Glyma.01G154900	Unigene1897	52.257	576	93	244	6	42	587	17	591	0	605	CiCCD4-2
CHYE_ASW34031.1	Unigene17152	100	338	62	0	0	211	548	1	338	0	700	CiCHYE1
CHYE_ASW34031.1	Unigene2604	53.351	388	71	177	4	152	538	1	385	6.25e-137	403	CiCHYE2
CRTISO_BAE79546.1	Unigene3346	98.107	581	91	9	1	1	581	3	581	0	1163	CiCRTISO
DXR_BAE79548.1	Unigene13868	98.21	447	92	8	0	26	472	9	455	0	895	CiDXR
DXS_BAE79547.1	Unigene6187	99.402	669	100	4	0	1	669	47	715	0	1375	CiDXS1
DXS_BAE79547.1	Unigene6904	78.067	652	97	143	0	12	663	71	722	0	1087	CiDXS2
DXS_BAE79547.1	Unigene5527	74.504	655	98	167	0	13	667	59	713	0	1028	CiDXS3
DXS_BAE79547.1	Unigene394	55.508	463	69	200	5	85	546	2	459	1.46e-179	518	CiDXS4
GGPS_BAE79550.1	Unigene18681	99.42	345	100	2	0	1	345	1	345	0	703	CiGGPS
LCYB_BAE79544.1	Unigene8232	98.795	498	100	6	0	1	498	1	498	0	1026	CiLCYB
LCYE_BAE79549.1	Unigene9863	98.739	238	53	3	0	1	238	89	326	2.77e-173	489	CiLCYE
NCED_Q9LRR7.1	Unigene8409	70.745	564	93	152	4	42	597	42	600	0	835	CiNCED1
NCED_Q9LRR7.1	Unigene9513	68.301	571	94	175	4	33	598	9	578	0	809	CiNCED2
NXS_K4C9E2.1	Unigene7022	67.068	498	100	162	2	1	498	1	496	0	709	CiNXS
PDS_BAE79552.1	Unigene4720	95.722	374	65	10	3	1	374	1	368	0	726	CiPDS
PSY_BAE79553.1	Unigene23948	72.378	286	88	79	0	24	309	81	366	2.61e-161	455	CiPSY
VDE_BAE79554.1	Unigene12352	97.297	481	100	7	3	1	480	4	479	0	958	CiVDE
ZDS_BAE79555.1	Unigene3464	99.625	533	91	2	0	1	533	1	533	0	1107	CiZDS
ZEP_BAE79556.1	Unigene12986	59.309	376	57	153	0	70	445	66	441	4.66e-150	442	CiZEP1
ZEP_BAE79556.1	Unigene20101	53.535	396	59	175	4	1	389	1	394	1.11e-127	383	CiZEP2
CiCOMT10_Contig234_G00037.t1	Unigene8682	98.851	261	71	3	0	1	261	1	261	0	531	CiCOMT10-1
CiCOMT10_Contig234_G00037.t1	Unigene18044	69.89	362	99	102	2	5	366	10	364	0	516	CiCOMT10-2
CiCOMT10_Contig234_G00037.t1	Unigene33916	73.29	307	84	75	2	60	366	1	300	6.42e-153	432	CiCOMT10-3
CiUGT11_Contig11_G00169.t1	Unigene22381	91.133	406	84	20	8	1	395	1	401	0	726	CiUGT11-1
CiUGT11_Contig11_G00169.t1	Unigene17670	72.559	379	79	94	5	91	463	1	375	0	563	CiUGT11-2
CiUGT11_Contig11_G00169.t1	Unigene18107	70.213	376	77	93	8	1	362	1	371	0	517	CiUGT11-3
CiUGT11_Contig11_G00169.t1	Unigene15570	55.819	464	96	190	6	7	461	5	462	1.36e-173	496	CiUGT11-4
CiUGT11_Contig11_G00169.t1	Unigene23333	51.157	389	81	174	5	5	384	2	383	3.51e-132	387	CiUGT11-5
AtCCD1_AT3G63520.1	Unigene5627	75.052	485	75	117	2	10	491	107	590	0	791	CiCCD1
AtCCD7_AT2G44990.1	Unigene9566	58.916	572	92	212	7	9	571	8	565	0	699	CiCCD7
AtCCD8_AT4G32810.1	Unigene10089	65.69	478	89	152	6	57	530	47	516	0	662	CiCCD8

## Sheet: Supplementary data 4
Supplementary data 4 Expression of candidate flavonoid and carotenoid biosynthesis genes in white and yellow-rayed C. indicum.
Gene ID	Gene name	FW1	FW2	FW3	FY1	FY2	FY3	log2FoldChange	padj	diffType	Pathway
Unigene5627	CiCCD1	124.27	227.82	209.67	82.51	135.9	152.62	0.604558	0.105073	No significant difference	carotenoid biosynthesis
Unigene10291	CiCCD4-1	5.59	20.16	16.92	0	0	0	10.9395	7.58572e-15	Up	carotenoid biosynthesis
Unigene1897	CiCCD4-2	7.37	6.29	5.96	5.41	4.41	4.26	0.213594	0.596553	No significant difference	carotenoid biosynthesis
Unigene3822	CiCCD4-3	46	61.45	55.71	22.32	26.98	23.03	1.10532	2.96791e-08	Up	carotenoid biosynthesis
Unigene9566	CiCCD7	0.16	0.37	0.15	0.8	1.13	1.1	-2.84214	0.000329948	Down	carotenoid biosynthesis
Unigene10089	CiCCD8	0.06	0	0.11	0	0.11	0.11	#N/A	#N/A	No significant difference	carotenoid biosynthesis
Unigene17152	CiCHYE1	100.04	173.01	146.33	152.39	91.78	92.37	0.381019	0.354668	No significant difference	carotenoid biosynthesis
Unigene2604	CiCHYE2	59.67	108.93	96.29	59.48	60.53	68.77	-0.222422	0.576652	No significant difference	carotenoid biosynthesis
Unigene3346	CiCRTISO	15.76	37.08	32.83	8.59	14.3	19.25	0.873296	0.0280993	No significant difference	carotenoid biosynthesis
Unigene13868	CiDXR	68.78	73.01	69.35	44.6	51.01	59.03	0.161723	0.566607	No significant difference	carotenoid biosynthesis
Unigene6187	CiDXS1	93.13	109.87	85.18	75.58	79.12	69.97	0.571089	0.173113	No significant difference	carotenoid biosynthesis
Unigene6904	CiDXS2	3.15	3.23	3.76	21.3	10.61	10.03	-1.98207	0.000281978	Down	carotenoid biosynthesis
Unigene5527	CiDXS3	54.16	67.32	58.18	30.72	44.74	36.9	0.427361	0.113716	No significant difference	carotenoid biosynthesis
Unigene394	CiDXS4	25.51	23.09	22.98	24.54	20.97	20.52	-0.0138997	0.959323	No significant difference	carotenoid biosynthesis
Unigene18681	CiGGPS	99.69	85.96	65.64	97.66	71.94	72.65	-0.00778879	0.986768	No significant difference	carotenoid biosynthesis
Unigene8232	CiLCYB	27.52	28.5	29.98	34.68	30.05	30.07	-0.217926	0.411582	No significant difference	carotenoid biosynthesis
Unigene9863	CiLCYE	23.77	47.68	34.48	112.81	55.72	52.3	-0.70471	0.217767	No significant difference	carotenoid biosynthesis
Unigene8409	CiNCED1	3.92	5.44	7.56	2.78	3.02	3.76	0.726886	0.0472399	No significant difference	carotenoid biosynthesis
Unigene9513	CiNCED2	7.1	5.38	8.48	4.3	5.58	6	0.326265	0.365757	No significant difference	carotenoid biosynthesis
Unigene7022	CiNXS	48.32	38.07	39.82	8.72	8.1	9	2.44984	6.51568e-30	Up	carotenoid biosynthesis
Unigene4720	CiPDS	66.81	113.31	102.36	39.48	51.76	61.67	0.648289	0.0767973	No significant difference	carotenoid biosynthesis
Unigene23948	CiPSY	5.87	5.55	4.86	0.09	0.13	0.1	5.49056	8.32902e-14	Up	carotenoid biosynthesis
Unigene12352	CiVDE	25.14	12.95	15.39	14.62	18.47	17.99	-0.384686	0.199423	No significant difference	carotenoid biosynthesis
Unigene3464	CiZDS	132.47	256.89	197.13	99.17	101.8	114.73	0.763744	0.0144906	No significant difference	carotenoid biosynthesis
Unigene12986	CiZEP1	21.84	61.13	44.42	4.51	11.85	14.54	1.98441	0.000163924	Up	carotenoid biosynthesis
Unigene20101	CiZEP2	11.39	46.33	35.71	37.45	26.2	33.23	-0.307923	0.639375	No significant difference	carotenoid biosynthesis
Unigene17077	CiDFR	179.64	94.57	170.83	0	0	0	13.8166	7.22164e-26	Up	flavonoids biosynthesis
Unigene10480	Ci4CL1	110.03	103.58	122.89	70.22	99.37	109.43	0.410571	0.147746	No significant difference	flavonoids biosynthesis
Unigene7490	Ci4CL2	63.43	39.38	43.84	12.67	19.58	32.24	0.660686	0.158349	No significant difference	flavonoids biosynthesis
Unigene19863	Ci4CL3	2.09	7.32	2.87	28.99	11.57	10.52	-2.17813	0.00134875	Down	flavonoids biosynthesis
Unigene5986	CiC4H	160.43	117.11	157.44	76.49	78.15	119.28	0.4821	0.144708	No significant difference	flavonoids biosynthesis
Unigene46082	CiCHI	592.32	429.78	579.12	265.57	274.59	280.41	0.807512	0.001594	No significant difference	flavonoids biosynthesis
Unigene22943	CiCHS1	0	0	0.14	0.09	0.09	0.05	#N/A	#N/A	No significant difference	flavonoids biosynthesis
Unigene13745	CiCHS2	204.63	130.19	142.05	365.4	179.6	249.41	-0.231533	0.651641	No significant difference	flavonoids biosynthesis
Unigene16367	CiCHS3	0.09	0.13	0.04	34.91	3.3	0.17	-7.35348	0.000126069	Down	flavonoids biosynthesis
Unigene6652	CiCHS4	15.06	11.74	13.05	25.82	5.37	2.84	0.123003	0.909458	No significant difference	flavonoids biosynthesis
Unigene19517	CiCHS5	8.29	4.21	2.99	0.25	0.21	0.43	6.11504	1.17072e-10	Up	flavonoids biosynthesis
Unigene18617	CiCHS6	0.04	0	0.16	0.78	4.16	1.62	-5.05137	6.37054e-06	Down	flavonoids biosynthesis
Unigene15798	CiCHS7	2.7	2.24	1.85	0.11	0.11	0.04	4.59651	2.14188e-08	Up	flavonoids biosynthesis
Unigene24083	CiCHS8	0.51	0.25	0.25	1	0.29	0.24	#N/A	#N/A	No significant difference	flavonoids biosynthesis
Unigene8682	CiCOMT10-1	123.36	254.75	138.88	169.88	143.8	195.46	-0.125922	0.783043	No significant difference	flavonoids biosynthesis
Unigene18044	CiCOMT10-2	9.34	5.79	7.99	22.99	23.83	22.78	-1.39415	1.33087e-05	Down	flavonoids biosynthesis
Unigene33916	CiCOMT10-3	2.1	0.62	0.74	1.24	1.75	4.8	-1.7788	0.0540134	No significant difference	flavonoids biosynthesis
Unigene9405	CiF3'5'H	63.01	73.98	81.02	58.65	100.67	96.05	-0.398144	0.126796	No significant difference	flavonoids biosynthesis
Unigene13845	CiF3G2Gt1	9.96	6.49	4.9	47.49	37.46	47.04	-2.73271	1.74215e-13	Down	flavonoids biosynthesis
Unigene27076	CiF3G2Gt2	3.06	3.8	5.1	1.05	0.42	0.59	2.43749	1.15004e-05	Up	flavonoids biosynthesis
Unigene11894	CiF3H	124.62	83.84	77.62	388.06	89.27	51.82	-0.836616	0.312526	No significant difference	flavonoids biosynthesis
Unigene4236	CiF3'H	68.72	34.63	50.9	1.72	13.35	27.78	1.85342	0.0298684	Up	flavonoids biosynthesis
Unigene1005	CiFLS	77.93	149.77	117.47	117.98	77.07	74.4	0.384025	0.388102	No significant difference	flavonoids biosynthesis
Unigene7311	CiFNS1	35.03	26.46	37.47	76.71	61.82	49.17	-0.941784	0.00373132	No significant difference	flavonoids biosynthesis
Unigene16312	CiFNS2	0.76	0.48	0.89	0.43	0.32	0.04	1.35244	0.210476	No significant difference	flavonoids biosynthesis
Unigene45195	CiFNS3	0	0	0.36	0	0	0	#N/A	#N/A	No significant difference	flavonoids biosynthesis
Unigene8641	CiPAL1	136.67	251.3	282.79	98.79	172.6	299.71	0.539373	0.222081	No significant difference	flavonoids biosynthesis
Unigene5810	CiPAL2	12.32	13.56	15.16	5.78	10.57	12.05	0.47462	0.186359	No significant difference	flavonoids biosynthesis
Unigene11790	CiUFGT	115.47	40.41	76.99	17.7	55.31	85.59	0.193423	0.806801	No significant difference	flavonoids biosynthesis
Unigene22381	CiUGT11_1	68.27	97.59	129.7	101.75	107.11	90.16	0.355195	0.306134	No significant difference	flavonoids biosynthesis
Unigene17670	CiUGT11_2	4.11	3	3.57	4.05	5.43	4.3	-0.265112	0.505656	No significant difference	flavonoids biosynthesis
Unigene18107	CiUGT11_3	83.06	49.3	63.46	23.69	25.43	35.34	0.282614	0.336568	No significant difference	flavonoids biosynthesis
Unigene15570	CiUGT11_4	28.83	33.61	34.15	2.32	2.1	3.63	3.75478	1.01839e-42	Up	flavonoids biosynthesis
Unigene23333	CiUGT11_5	19.22	15.63	20.38	8.57	10.54	11.77	0.460435	0.101004	No significant difference	flavonoids biosynthesis

## Sheet: Supplementary data 5
Supplementary data 5 The expression patterns of transcription factors in white and yellow-flowered C. indicum.
Gene ID	Family	FW1	FW2	FW3	FY1	FY2	FY3	log2FoldChange	padj	diffType
Unigene17299	B3	6.02	4.58	0.14	3.77	7.11	5.9	-2.94754	9.90873e-06	Down
Unigene143197	AP2	0	1.62	0	0.48	1.21	0	#N/A	#N/A	No Significant Difference
Unigene1635	AP2	89.32	48.11	71.93	21.55	37.18	49.78	0.608333	0.196857	No Significant Difference
Unigene17469	AP2	4.8	8.24	6.61	5.36	4.18	3.89	0.307165	0.467118	No Significant Difference
Unigene179346	AP2	0	0	0	0	0.84	0.88	#N/A	#N/A	No Significant Difference
Unigene19220	AP2	1.04	2.2	1.78	1.47	3.6	6.72	-1.2886	0.054505	No Significant Difference
Unigene35050	AP2	0.65	0.41	0.63	0.27	0.47	0.41	#N/A	#N/A	No Significant Difference
Unigene23238	B3	0.27	0.26	0.37	2.11	2.09	2.09	-2.88834	1.49851e-06	Down
Unigene3784	AP2	0.15	0.88	1.11	0.93	1.79	2	-1.50347	0.0285101	Down
Unigene65791	ZF-HD	1.3	1.22	1.1	10.12	3.33	1.76	-2.17713	0.0182542	Down
Unigene61816	AP2	1.04	1.85	2.15	0.74	0.74	0.63	#N/A	#N/A	No Significant Difference
Unigene74357	B3	0.51	0.63	0.16	18.48	15.98	17.03	-5.37377	8.69348e-16	Down
Unigene1045	ARF	10.16	23.3	23.29	11.78	13.19	15.1	0.405234	0.332153	No Significant Difference
Unigene1161	ARF	54.35	54.42	67.07	29.41	42.22	46.09	0.639066	0.101135	No Significant Difference
Unigene1163	ARF	31.82	26.13	29.58	20.67	19.14	18.39	0.506662	0.0146362	No Significant Difference
Unigene1372	ARF	187	142.04	158.64	106.16	121.57	114.73	0.621291	0.0226072	No Significant Difference
Unigene14284	ARF	15.03	12.45	11.96	16.76	17.92	15.91	-0.417404	0.166276	No Significant Difference
Unigene2014	ARF	2.29	15.41	16.2	7.49	10.33	10.71	0.0774749	0.926598	No Significant Difference
Unigene3289	ARF	120.21	94.6	103.76	87.41	86.08	91.81	0.446763	0.0639412	No Significant Difference
Unigene4066	ARF	7.69	10.43	8.75	17.87	12.73	12.3	-0.756567	0.0221999	No Significant Difference
Unigene4067	ARF	1.44	6.12	4.22	5.4	3.56	6.19	-0.344712	0.457349	No Significant Difference
Unigene13931	WRKY	5.39	3.3	3.67	9.23	9.94	11.64	-1.39068	0.000204267	Down
Unigene4957	ARF	5.76	5.22	6.09	3.71	2.46	2.42	0.84532	0.0269167	No Significant Difference
Unigene5320	ARF	1.97	6.72	6.82	4.29	2.61	3.03	0.797457	0.205842	No Significant Difference
Unigene6583	ARF	4.56	4.25	5.96	1.85	3.97	3.98	0.466929	0.291801	No Significant Difference
Unigene7161	ARF	5.47	6.88	8.35	8.52	6.4	7.02	-0.261028	0.526965	No Significant Difference
Unigene7413	ARF	0.74	6.7	5.59	19.77	9.96	8.12	-1.40041	0.108042	No Significant Difference
Unigene8106	ARF	29.83	29.46	35.05	16.24	22.59	25.16	0.412268	0.138717	No Significant Difference
Unigene9154	ARF	0.29	0.25	0.09	0.27	0.23	0.35	#N/A	#N/A	No Significant Difference
Unigene11933	ARR-B	1.59	0.78	1.41	0.51	0.78	0.88	0.45795	0.466092	No Significant Difference
Unigene5663	ARR-B	11.47	11.43	11.9	14.8	16.39	11.74	-0.173328	0.567743	No Significant Difference
Unigene6654	ARR-B	30.31	38.92	36.92	38.88	38.66	38.29	0.456965	0.0385511	No Significant Difference
Unigene7006	ARR-B	0.75	0.95	1.03	2.19	1.35	1.45	-0.955205	0.04474	No Significant Difference
Unigene10605	B3	2.6	4.48	5.56	1.8	3.32	1.73	0.565946	0.280946	No Significant Difference
Unigene118961	B3	0.37	0	0	0.98	0.32	0	#N/A	#N/A	No Significant Difference
Unigene122096	B3	0	2.36	2.08	0	0.34	0.35	#N/A	#N/A	No Significant Difference
Unigene12535	B3	18.11	18.99	19.16	12.33	13.8	14.5	0.282796	0.24315	No Significant Difference
Unigene14803	B3	4.96	3.33	5.08	0.67	1.02	1.78	1.88615	0.000113966	Up
Unigene148123	B3	0	0.5	0.52	1.04	0	2.63	#N/A	#N/A	No Significant Difference
Unigene15114	B3	0.65	0.74	0.64	1.48	1.43	1.07	-1.03572	0.0543411	No Significant Difference
Unigene15432	B3	0.45	7.04	4.04	2.17	4.4	5	0.451053	0.656473	No Significant Difference
Unigene15667	B3	1.65	2	1.75	1.28	1.63	1.59	0.277238	0.649148	No Significant Difference
Unigene156954	B3	0.7	0	1.79	0	0.58	0	#N/A	#N/A	No Significant Difference
Unigene162088	B3	2.29	12.97	18.09	2.61	5.68	12.56	0.659945	0.603968	No Significant Difference
Unigene16236	B3	0.88	0.71	0.82	1.07	1.26	1.3	-0.652905	0.225971	No Significant Difference
Unigene167703	B3	0	0	0.7	0	1.38	2.17	#N/A	#N/A	No Significant Difference
Unigene16813	B3	136.29	108.34	138.6	131	157.01	141.92	-0.65363	0.00676522	No Significant Difference
Unigene170376	B3	0	1.41	1.48	1.5	2.17	1.52	#N/A	#N/A	No Significant Difference
Unigene17221	B3	7.42	10.23	9.34	14.12	10.68	8.3	-0.512838	0.197929	No Significant Difference
Unigene15280	bHLH	1.31	1.37	0.98	4.83	3.97	2.21	-1.76361	0.00241707	Down
Unigene17564	B3	0.84	6.36	6.66	4.05	3.7	3.47	0.351656	0.702308	No Significant Difference
Unigene19280	B3	2.69	4.09	3.85	1.98	1.02	1.78	-0.10544	0.886015	No Significant Difference
Unigene19635	B3	0.79	0.72	0.96	2.71	1.15	1.4	-1.22872	0.0740123	No Significant Difference
Unigene19910	B3	2.3	7.19	8.95	2.22	3.73	4.7	0.505229	0.502137	No Significant Difference
Unigene21171	B3	0	0	0	0.79	0.55	0.42	#N/A	#N/A	No Significant Difference
Unigene11319	WRKY	3.06	3.74	6	10.07	6.28	10.56	-1.16496	0.00514117	Down
Unigene23437	B3	10.2	6.17	6.68	15.01	13.68	13.26	-0.796957	0.058036	No Significant Difference
Unigene23607	B3	13.4	16.36	17.98	22.11	29.28	24.87	-0.861712	0.00326306	No Significant Difference
Unigene24188	B3	8.66	7.65	8.77	4.65	5.3	4.51	0.154952	0.75999	No Significant Difference
Unigene24582	B3	27.96	22.07	26.71	38.43	43.23	41.99	-0.753353	0.00184896	No Significant Difference
Unigene26003	B3	2.45	1.06	3.1	0.89	1.54	1.56	0.50308	0.500969	No Significant Difference
Unigene2761	B3	12.08	10.01	15.59	5.88	7.08	6.19	0.450304	0.126895	No Significant Difference
Unigene27661	B3	0	0.83	1	0.62	0.61	0.5	#N/A	#N/A	No Significant Difference
Unigene20334	WRKY	43.26	25.87	25.83	9.13	9.99	10.95	1.50942	4.65691e-09	Up
Unigene2920	B3	4.47	10.19	10.52	3.02	4	7.17	0.416831	0.294295	No Significant Difference
Unigene22670	WRKY	16.07	8.02	9.52	4.1	4.43	5.91	1.21374	0.00412379	Up
Unigene32787	B3	1.75	4.17	7.04	2.7	3.7	3.93	0.195016	0.787404	No Significant Difference
Unigene3549	B3	38.81	33.57	38.29	31.81	45.11	37.04	0.0638242	0.84483	No Significant Difference
Unigene30137	WRKY	2.16	2.98	4.28	2.52	5.41	7.85	-1.1189	0.0483981	Down
Unigene41539	B3	0.52	0.51	0.08	2.61	0.58	0.95	#N/A	#N/A	No Significant Difference
Unigene42301	B3	1.08	1.29	1.8	0.09	0	0	#N/A	#N/A	No Significant Difference
Unigene46628	B3	0.19	0	0	0.09	0.27	0.27	#N/A	#N/A	No Significant Difference
Unigene47386	B3	0.2	5.44	4.07	1.29	3.08	4.61	-0.0120173	0.993153	No Significant Difference
Unigene48984	B3	0	0.22	0.33	1.21	2.28	2.19	#N/A	#N/A	No Significant Difference
Unigene49423	B3	0	4.24	4.97	0.19	1.63	1.68	1.32679	0.431095	No Significant Difference
Unigene50014	B3	0	0	0	0.1	0.1	0	#N/A	#N/A	No Significant Difference
Unigene50723	B3	1.92	1.26	0.49	0.1	0	0.25	#N/A	#N/A	No Significant Difference
Unigene7126	WRKY	18.68	9.49	16.66	6.59	6.07	9.28	1.10248	0.0202913	Up
Unigene53050	B3	0.11	2.87	2.69	0	0	0	6.51287	0.00119925	Up
Unigene56071	B3	0.72	0.23	0.11	0.11	0.44	0.11	#N/A	#N/A	No Significant Difference
Unigene60352	B3	0	1.28	1.13	1.47	0.37	0.75	#N/A	#N/A	No Significant Difference
Unigene66560	B3	0	0	0	0.95	0.27	0	#N/A	#N/A	No Significant Difference
Unigene6116	C3H	0.1	1.13	0.55	0.69	2.15	2.34	-1.97666	0.0122764	Down
Unigene3908	WRKY	6.62	3.28	4.86	1.33	1.11	1.28	1.71786	5.70177e-06	Up
Unigene6779	B3	4.84	5.85	7.19	3.91	3.28	4	0.742823	0.0250623	No Significant Difference
Unigene6891	B3	2.24	5.17	7.12	6.03	5.54	5.95	-0.103758	0.85797	No Significant Difference
Unigene6149	Dof	1.21	1.08	0.96	1.83	2.24	2.38	-1.04739	0.00394829	Down
Unigene76196	B3	1.6	11.28	10.66	6.66	9.17	13.47	-0.725333	0.503715	No Significant Difference
Unigene7791	B3	1.02	1.71	2.13	1.63	2.52	1.91	-0.306128	0.528006	No Significant Difference
Unigene8918	B3	28.38	29.86	32.18	32.18	33.45	32.9	-0.201203	0.339786	No Significant Difference
Unigene9235	B3	24.38	20.47	19.9	11.45	13.69	12.9	0.682065	0.0147899	No Significant Difference
Unigene94331	B3	2.89	1.31	1.56	0	0	0	#N/A	#N/A	No Significant Difference
Unigene12276	TCP	7.23	8.36	8.64	1.88	2.52	3.49	1.4631	1.21982e-06	Up
Unigene14573	BBR-BPC	50.02	45.35	41.88	61.6	52.94	50.32	-0.334488	0.265013	No Significant Difference
Unigene1531	BBR-BPC	134.09	118.07	124.19	109.61	106.29	102.62	0.166648	0.525154	No Significant Difference
Unigene6279	BBR-BPC	11.71	13.97	17	13.77	13.65	12.61	-0.213578	0.421002	No Significant Difference
Unigene118802	BES1	5.78	5.97	8.72	4.85	9.53	8.88	-0.449385	0.522203	No Significant Difference
Unigene16489	BES1	7.09	8.1	7.9	10.76	9.33	5.08	-0.712158	0.199559	No Significant Difference
Unigene18562	BES1	11.3	8.93	7.85	7.41	6.24	6.26	0.553406	0.0471856	No Significant Difference
Unigene20637	BES1	17.38	13.01	12.83	17.19	17.9	15.53	-0.336263	0.357801	No Significant Difference
Unigene31935	BES1	1.77	1.51	2.03	2.5	1.66	1.61	-0.196379	0.769562	No Significant Difference
Unigene4195	BES1	12.88	27.05	22.75	24.9	20.18	22.43	-0.139624	0.724428	No Significant Difference
Unigene12534	TCP	65.17	54.89	65.84	18.48	28.19	33.81	1.15948	0.000100757	Up
Unigene84598	BES1	0	0	0.38	0.19	0.18	0.19	#N/A	#N/A	No Significant Difference
Unigene102236	bHLH	1.1	0	0	0	1.23	1.26	#N/A	#N/A	No Significant Difference
Unigene102675	bHLH	0	0	0	0.25	0	0	#N/A	#N/A	No Significant Difference
Unigene10712	bHLH	6.3	8.6	10.19	7.23	6.09	6.3	0.650372	0.0685074	No Significant Difference
Unigene107485	bHLH	0.34	0	0	1.54	1.8	1.2	#N/A	#N/A	No Significant Difference
Unigene10989	bHLH	3.42	3.27	3.31	5.76	2.75	2.98	-0.259918	0.637179	No Significant Difference
Unigene11358	bHLH	3.62	6.87	8.24	3.45	4.38	3.83	0.47684	0.181313	No Significant Difference
Unigene11445	bHLH	45.45	65.58	53.58	71.66	35.03	35.89	-0.102045	0.855776	No Significant Difference
Unigene11678	bHLH	3.92	3.95	4.19	2.84	3.63	3.96	-0.350474	0.405941	No Significant Difference
Unigene118023	bHLH	0	0	0	0	0	0	#N/A	#N/A	No Significant Difference
Unigene12004	bHLH	1.07	1.25	1.28	0.4	0.47	0.18	1.28133	0.120322	No Significant Difference
Unigene12231	bHLH	13.53	27.04	23.25	14.22	18.28	19.65	-0.0471433	0.893266	No Significant Difference
Unigene13282	bHLH	14.55	12.27	13	10.23	12.37	12.39	0.154779	0.618874	No Significant Difference
Unigene38802	ERF	1.36	0.31	1.31	7.5	1.71	3.69	-2.20875	0.0132318	Down
Unigene13691	bHLH	9.04	9.52	10	12.27	13.55	9.9	0.846648	0.000260252	No Significant Difference
Unigene13965	bHLH	0.23	0.5	0.19	0.04	0.22	0.22	#N/A	#N/A	No Significant Difference
Unigene14232	bHLH	0.66	0.45	0.37	0.42	0.36	0.36	#N/A	#N/A	No Significant Difference
Unigene14551	bHLH	2.75	3.27	2.36	2.42	2.94	2.74	-0.0287484	0.950523	No Significant Difference
Unigene14867	bHLH	6.42	5.2	5.48	2.99	4.34	4.26	0.208859	0.594141	No Significant Difference
Unigene14933	bHLH	17.44	13.7	14.54	9.63	12.51	13.33	-0.14335	0.685554	No Significant Difference
Unigene150090	bHLH	0.62	0	1.59	1.07	0.52	1.62	#N/A	#N/A	No Significant Difference
Unigene38931	ERF	2.08	1.23	0.54	9.69	4.19	2.95	-2.19252	0.00645438	Down
Unigene16308	bHLH	4.11	2.16	1.68	5.55	3.73	1.12	-0.222798	0.835917	No Significant Difference
Unigene16384	bHLH	4.05	4.69	4.21	5.19	1.73	2.13	0.177595	0.808911	No Significant Difference
Unigene16408	bHLH	0.04	0	0.04	0.14	0.1	0.04	#N/A	#N/A	No Significant Difference
Unigene16431	bHLH	2.81	4.08	2.79	4.63	2.63	2.09	-0.289541	0.65375	No Significant Difference
Unigene165055	bHLH	0	0	0	0	0	0	#N/A	#N/A	No Significant Difference
Unigene15627	TCP	1.97	3	2.85	11.23	4.69	4.27	-1.36332	0.024341	Down
Unigene16830	bHLH	4.6	3.46	5.08	1.62	2.44	0.54	1.47035	0.0222351	Up
Unigene16873	bHLH	194.48	109.43	131.86	63.89	73.38	66.25	0.624707	0.0385383	No Significant Difference
Unigene17547	bHLH	0.86	1.09	1.03	1.95	1.28	0.53	-0.390589	0.648856	No Significant Difference
Unigene17680	bHLH	0.28	1.93	1.7	0.45	0.87	0.84	#N/A	#N/A	No Significant Difference
Unigene17685	bHLH	0.37	0.4	0.43	0	0	0.04	#N/A	#N/A	No Significant Difference
Unigene15926	TCP	3.47	4.16	4.19	10.78	12.66	10.55	-1.59133	3.58586e-11	Down
Unigene180140	bHLH	0	0	0	0	0	1.79	#N/A	#N/A	No Significant Difference
Unigene18076	bHLH	6.95	10.46	13.56	6.1	8.56	9.69	-0.114303	0.777615	No Significant Difference
Unigene182050	bHLH	0	0	0	0	0	0	#N/A	#N/A	No Significant Difference
Unigene18456	bHLH	13.06	12.59	14.04	15.19	13.66	11.02	-0.330609	0.321321	No Significant Difference
Unigene18703	bHLH	62.09	41.31	42.02	54.6	54.48	55.22	-0.272818	0.428786	No Significant Difference
Unigene18841	bHLH	1.6	8.61	8.17	2.36	3.19	4.25	0.853625	0.243888	No Significant Difference
Unigene189349	bHLH	0	0	0	0	1	1.06	#N/A	#N/A	No Significant Difference
Unigene19140	bHLH	1.8	1.9	1.46	0	0	0	7.804	2.47771e-08	Up
Unigene19327	bHLH	2.15	1.26	2.27	1.01	0.42	0.29	1.73675	0.0101505	Up
Unigene19473	bHLH	0.22	0.17	0.47	0.08	0.08	0.12	#N/A	#N/A	No Significant Difference
Unigene19491	bHLH	0.17	0	0.17	0.36	3.85	0.12	#N/A	#N/A	No Significant Difference
Unigene1962	bHLH	7.7	13.95	14.42	7.67	6.06	6.29	0.878816	0.00348911	No Significant Difference
Unigene20059	bHLH	5.92	3.11	3.68	1.11	5.13	4.39	0.196134	0.786069	No Significant Difference
Unigene20260	bHLH	0	0	0	0	0	0	#N/A	#N/A	No Significant Difference
Unigene20396	bHLH	0.89	1.42	0.83	0.83	0.63	0.51	0.596812	0.41102	No Significant Difference
Unigene20859	bHLH	4.31	4.16	4.6	2.58	2.56	2.36	0.735518	0.0293745	No Significant Difference
Unigene21178	bHLH	2.03	1.29	1.67	2.61	1.77	1.3	-0.429167	0.480274	No Significant Difference
Unigene21428	bHLH	0.14	0	0.14	2.08	0.26	0.22	#N/A	#N/A	No Significant Difference
Unigene21449	bHLH	7.82	5.44	5.99	19.51	9.18	6.6	-0.959508	0.109233	No Significant Difference
Unigene21565	bHLH	2.74	5.23	4.29	3.02	2.77	0.37	0.84919	0.331845	No Significant Difference
Unigene2182	bHLH	80.58	52	56.55	71.68	72.41	65.74	0.0154436	0.976463	No Significant Difference
Unigene43661	ERF	0.72	0.35	1.13	2.85	1.6	2.89	-1.81825	0.017296	Down
Unigene22263	bHLH	0.15	0.05	0	1.55	3.08	3.63	-5.30042	2.44039e-06	Down
Unigene22703	bHLH	11.41	5.21	8.93	1.85	2.91	3.31	0.841815	0.152359	No Significant Difference
Unigene22820	bHLH	0.43	0.41	0.16	0.51	0.2	0.05	#N/A	#N/A	No Significant Difference
Unigene23082	bHLH	0.74	1.01	0.88	0.14	0.14	0	#N/A	#N/A	No Significant Difference
Unigene23258	bHLH	1.24	1.1	0.92	3.09	1.67	0.61	-0.815333	0.352088	No Significant Difference
Unigene23360	bHLH	1.42	12	3.26	3.14	6.26	4.8	0.277063	0.78653	No Significant Difference
Unigene23544	bHLH	0.55	0.48	0.44	0.19	0.38	0.09	#N/A	#N/A	No Significant Difference
Unigene23588	bHLH	0.05	0.1	0.1	0.42	0.19	0.38	#N/A	#N/A	No Significant Difference
Unigene25129	bHLH	13.15	41.01	40.37	22.16	30.86	30.06	0.0960836	0.874514	No Significant Difference
Unigene25524	bHLH	0	0.06	0.06	0.55	0.7	0.61	#N/A	#N/A	No Significant Difference
Unigene25867	bHLH	1.77	0.42	0.98	2.55	2.05	2.45	-1.20816	0.111576	No Significant Difference
Unigene25936	bHLH	0.16	0	0	0.15	0.52	0.31	#N/A	#N/A	No Significant Difference
Unigene26603	bHLH	87.89	64.76	78.15	58.12	65.35	63.99	0.348332	0.236803	No Significant Difference
Unigene27325	bHLH	1.05	0.57	0.25	1.53	0.64	0.6	#N/A	#N/A	No Significant Difference
Unigene27709	bHLH	0.63	0.51	0.34	0.44	0.59	1.25	#N/A	#N/A	No Significant Difference
Unigene28103	bHLH	0.41	0.34	0.11	0.98	0.22	0.05	#N/A	#N/A	No Significant Difference
Unigene23044	TCP	2.49	2.28	1.87	7.39	5	4.38	-1.35564	0.00303993	Down
Unigene29259	bHLH	1.15	1.5	1.21	0	0.19	0	4.3845	0.000521763	Up
Unigene29533	bHLH	0	0.24	0	1.12	1.99	1.48	-3.90581	0.00203385	Down
Unigene29576	bHLH	1.53	1.82	1.78	0.17	0.17	0.12	3.41692	1.58764e-05	Up
Unigene30111	bHLH	5.16	4.13	6.11	0.83	0.9	1.22	1.9591	8.76751e-05	Up
Unigene30695	bHLH	15.78	17.23	20.34	22.11	33.82	32.65	-0.864884	0.000802925	No Significant Difference
Unigene31551	bHLH	0.84	1.06	0.69	0.06	0.06	0.18	#N/A	#N/A	No Significant Difference
Unigene32313	bHLH	0.73	1.15	1.16	4.76	2.36	1.38	-1.59461	0.0306024	Down
Unigene3429	bHLH	6.7	6.17	6.66	12.04	7.38	5.95	-0.480405	0.32019	No Significant Difference
Unigene34487	bHLH	0.78	0.81	1.37	0.13	0	0	#N/A	#N/A	No Significant Difference
Unigene34804	bHLH	0.21	0.07	0	1	0.6	0.4	#N/A	#N/A	No Significant Difference
Unigene35037	bHLH	0	0.07	0	0.2	0.07	0.07	#N/A	#N/A	No Significant Difference
Unigene35249	bHLH	0	0	0.39	0	0.27	0.44	#N/A	#N/A	No Significant Difference
Unigene44488	ERF	1.66	1.05	0.89	3.16	2.49	3.12	-1.33826	0.0308966	Down
Unigene36849	bHLH	0	0	0	0	0.07	0	#N/A	#N/A	No Significant Difference
Unigene6462	TCP	13.63	21.78	23.5	5.6	7.76	11.38	1.08191	0.000475363	Up
Unigene38955	bHLH	0.24	0.12	0	0	0	0.12	#N/A	#N/A	No Significant Difference
Unigene39984	bHLH	2.2	6.9	6.38	0.67	2.09	1.75	1.69347	0.0208114	Up
Unigene4191	bHLH	135.62	107.95	110.86	101.45	86.38	78.05	0.236145	0.478712	No Significant Difference
Unigene4284	bHLH	32.51	46.39	49.79	22.62	26.76	27.99	-0.605752	0.0306061	No Significant Difference
Unigene4315	bHLH	10.51	10.99	12.12	5.94	7.96	6.71	0.667444	0.00329476	No Significant Difference
Unigene4567	bHLH	19.22	29.85	26.11	27.8	28.97	28.27	-0.187345	0.531933	No Significant Difference
Unigene45875	bHLH	0	0	0	0	0.35	0	#N/A	#N/A	No Significant Difference
Unigene45980	bHLH	0	0	0	0	0.18	0	#N/A	#N/A	No Significant Difference
Unigene4621	bHLH	51.08	29.09	34.49	34.1	38.92	33.38	0.0684337	0.884032	No Significant Difference
Unigene51313	bHLH	0	0	0	0	0.1	0	#N/A	#N/A	No Significant Difference
Unigene51874	bHLH	1.86	2.63	1.78	6.34	2.1	1.14	-0.668248	0.499027	No Significant Difference
Unigene52931	bHLH	1.33	0.32	0.7	0.12	0.12	0.12	#N/A	#N/A	No Significant Difference
Unigene53162	bHLH	0.56	0.54	0.98	3.48	0.76	0.53	#N/A	#N/A	No Significant Difference
Unigene53603	bHLH	0.23	0.86	0.43	0.21	0.21	0.21	#N/A	#N/A	No Significant Difference
Unigene54891	bHLH	10.33	6.9	4.17	10.67	3.42	2.07	0.327275	0.744843	No Significant Difference
Unigene5673	bHLH	4.3	3.58	5.17	4.54	5.31	5.23	-0.351423	0.347253	No Significant Difference
Unigene56793	bHLH	1.81	4.28	3.24	0.97	0.32	0.55	#N/A	#N/A	No Significant Difference
Unigene57503	bHLH	0.74	0.23	0.8	1.28	0.75	0.12	#N/A	#N/A	No Significant Difference
Unigene59350	bHLH	42.28	70.36	57.55	139.69	73	71.39	-0.831221	0.0880533	No Significant Difference
Unigene60312	bHLH	0	0	0	0	0.36	0.12	#N/A	#N/A	No Significant Difference
Unigene6032	bHLH	19.19	27.96	22.61	15.88	19.76	19.47	-0.0686611	0.81994	No Significant Difference
Unigene61425	bHLH	0	0	0	0.24	0	0	#N/A	#N/A	No Significant Difference
Unigene14971	TCP	14.77	13.08	11.24	2.52	2.89	1.99	2.67386	3.62133e-16	Up
Unigene63907	bHLH	0.14	0.92	0.8	1.41	4.76	7.04	-2.87842	0.00285591	Down
Unigene6558	bHLH	72.7	40.03	46.06	51.35	26.45	27.03	0.346278	0.426128	No Significant Difference
Unigene6607	bHLH	55.72	61.07	50.91	120.05	71.21	51.68	-0.722615	0.137618	No Significant Difference
Unigene6813	bHLH	3.51	2.99	2.72	3.5	3.79	2.26	0.146142	0.777305	No Significant Difference
Unigene69425	bHLH	0	0	0	0	0	0	#N/A	#N/A	No Significant Difference
Unigene7256	bHLH	6.4	9.11	10.77	6.13	6.55	6.52	0.0614415	0.872017	No Significant Difference
Unigene73413	bHLH	0	0	0	0	0	0	#N/A	#N/A	No Significant Difference
Unigene7743	bHLH	15.55	21.1	22.67	14.64	14.03	13.16	0.278252	0.275395	No Significant Difference
Unigene78453	bHLH	18.17	26.16	30.2	5.87	15.91	17.72	0.738145	0.184134	No Significant Difference
Unigene8044	bHLH	8.35	14.94	13.32	14.74	13.44	12.05	-0.22403	0.543969	No Significant Difference
Unigene8165	bHLH	1.52	1.25	1.51	0.33	0.71	0.81	1.3598	0.0154591	Up
Unigene8239	bHLH	1.45	1.59	1.49	1.85	1.43	1.44	-0.427866	0.342707	No Significant Difference
Unigene8270	bHLH	0.03	0.19	0.08	1.96	0.23	0.68	-3.12118	0.0115424	Down
Unigene87150	bHLH	0.21	0	0.2	0	0	0	#N/A	#N/A	No Significant Difference
Unigene87189	bHLH	13.04	13.41	17.06	4.57	9.27	8.87	0.880243	0.191194	No Significant Difference
Unigene89927	bHLH	0	0	0	0	0	0	#N/A	#N/A	No Significant Difference
Unigene90154	bHLH	0	0	0	0	0	0	#N/A	#N/A	No Significant Difference
Unigene9160	bHLH	49.19	52.61	51.35	56.12	44.27	40.33	-0.0551716	0.884476	No Significant Difference
Unigene9602	bHLH	0.2	0.2	0.38	5.17	0.05	0.11	#N/A	#N/A	No Significant Difference
Unigene10753	bZIP	83.3	75.27	74.83	55.34	58.68	47.45	0.168665	0.501733	No Significant Difference
Unigene11776	bZIP	0.29	0.43	0.28	0.09	0.3	0.12	#N/A	#N/A	No Significant Difference
Unigene12117	bZIP	83.6	81.04	90.01	68.96	66.76	61.58	0.0825429	0.790712	No Significant Difference
Unigene121791	bZIP	0	0	0	0	0	0	#N/A	#N/A	No Significant Difference
Unigene122978	bZIP	0	0	0	0	0	0	#N/A	#N/A	No Significant Difference
Unigene123708	bZIP	0	0	0	0	0	0	#N/A	#N/A	No Significant Difference
Unigene12786	bZIP	12.51	16.6	17.16	19.37	20.13	19.38	-0.443588	0.0446245	No Significant Difference
Unigene1358	bZIP	21.23	13.95	18.16	14.72	19.45	18.28	0.0389497	0.919892	No Significant Difference
Unigene136662	bZIP	0	0	0	0.43	0	0	#N/A	#N/A	No Significant Difference
Unigene13749	bZIP	0.45	0.23	0.3	0.45	0.29	0.39	#N/A	#N/A	No Significant Difference
Unigene147652	bZIP	0	0	0	0	0	0	#N/A	#N/A	No Significant Difference
Unigene14922	bZIP	13.03	10.18	13.13	6.33	8.89	9.35	0.504352	0.0933637	No Significant Difference
Unigene149857	bZIP	0	0	0	0	0	0	#N/A	#N/A	No Significant Difference
Unigene156850	bZIP	0	0	0	0	0	0	#N/A	#N/A	No Significant Difference
Unigene1622	bZIP	24.47	26.96	25.84	30.1	34.57	35.66	-0.4506	0.0229426	No Significant Difference
Unigene1656	bZIP	8.01	8.2	7.35	12.17	11.96	12.21	-0.903351	0.000131323	No Significant Difference
Unigene22155	FAR1	1.45	0.66	0.44	2.57	1.5	2.17	-2.20214	0.00233634	Down
Unigene186577	bZIP	0	0	0	0	0	0	#N/A	#N/A	No Significant Difference
Unigene18710	bZIP	4.37	4.06	4.79	7.22	9.08	7.23	-0.892889	0.00135689	No Significant Difference
Unigene18876	bZIP	0	0	0	0.04	0.73	0.08	#N/A	#N/A	No Significant Difference
Unigene19023	bZIP	0	0.05	0	0.97	0.95	0.52	#N/A	#N/A	No Significant Difference
Unigene191444	bZIP	0	0	0	0	1.03	0	#N/A	#N/A	No Significant Difference
Unigene1945	bZIP	12.97	25.33	26.34	8.07	12.36	14.04	0.83484	0.0272847	No Significant Difference
Unigene1960	bZIP	45.63	36.38	45.35	51.97	46.55	42.96	-0.144776	0.586972	No Significant Difference
Unigene19898	bZIP	0.29	0.17	0.11	1.02	0.55	0.56	#N/A	#N/A	No Significant Difference
Unigene20132	bZIP	5.37	10.77	6.58	10.94	10.79	13.09	-0.471462	0.203632	No Significant Difference
Unigene21031	bZIP	1.8	1.29	2.37	1.64	1.35	0.92	0.439262	0.532987	No Significant Difference
Unigene21553	bZIP	177.02	88.73	112.7	96.93	116.67	116.81	0.0532062	0.914913	No Significant Difference
Unigene22143	bZIP	284.15	220.94	246.2	163.25	202.7	156.61	0.529805	0.0577409	No Significant Difference
Unigene22394	bZIP	0.24	0.14	0.24	0.23	0.04	0.06	#N/A	#N/A	No Significant Difference
Unigene22517	bZIP	3.81	3.72	5.35	4.5	5.75	6.7	-0.458208	0.210915	No Significant Difference
Unigene7585	TALE	5.81	6.74	8.06	11.48	15.51	18.39	-1.25012	4.95492e-06	Down
Unigene23766	bZIP	0	0	0.05	0.05	0.38	0	#N/A	#N/A	No Significant Difference
Unigene24312	bZIP	5.85	14.74	8.86	9.72	8.29	9.88	-0.37099	0.449995	No Significant Difference
Unigene24861	bZIP	0	0	0	0.15	0.34	0.15	#N/A	#N/A	No Significant Difference
Unigene25829	bZIP	184.88	113.69	136.24	115.8	110.49	120.6	0.134977	0.749	No Significant Difference
Unigene2644	bZIP	24.24	28.59	31.05	23.01	26.84	27.93	0.0472693	0.847827	No Significant Difference
Unigene3628	SBP	3.85	8.48	13.5	30.02	32.89	35.13	-1.40622	3.68483e-05	Down
Unigene27070	bZIP	0	0	0	0.21	1.27	0.11	#N/A	#N/A	No Significant Difference
Unigene2883	bZIP	38.55	33.76	34.83	30.98	42.16	40.27	-0.126659	0.658295	No Significant Difference
Unigene28907	bZIP	5.17	20.67	19.8	7.51	12.42	13.64	0.34647	0.610102	No Significant Difference
Unigene17498	Nin-like	4.06	3.94	3.34	10.46	9.47	7.63	-1.78535	1.86292e-06	Down
Unigene29670	bZIP	0.68	0.13	0.92	0	0	0.13	#N/A	#N/A	No Significant Difference
Unigene31124	bZIP	0	0	0	0.12	0	0.06	#N/A	#N/A	No Significant Difference
Unigene52997	Nin-like	3.06	4.15	2.65	11.69	15.29	18.62	-2.62163	7.53842e-10	Down
Unigene32396	bZIP	120.97	78.29	79.87	202.24	97.51	77.32	-0.620803	0.287927	No Significant Difference
Unigene33377	bZIP	0.28	1.11	1.23	23.1	20.7	21.71	-4.64955	2.54024e-20	Down
Unigene35468	bZIP	0	0	0	0	0.34	0.07	#N/A	#N/A	No Significant Difference
Unigene35585	bZIP	1.69	1.05	2.19	2.45	3.14	3.1	-0.879241	0.108907	No Significant Difference
Unigene35601	bZIP	3.3	5.79	3.39	4.94	7.35	4.37	-0.843955	0.118604	No Significant Difference
Unigene3747	bZIP	33.88	24.66	24.56	28.73	26.23	26.46	-0.0440779	0.913574	No Significant Difference
Unigene38228	bZIP	3.58	2.7	1.99	0.61	1.3	1.26	1.64956	0.0164791	Up
Unigene38561	bZIP	2.19	2.02	0.94	1.37	2.53	1.86	-0.0793574	0.927284	No Significant Difference
Unigene6689	FAR1	0.06	0.13	0.1	7.44	4.93	5.38	-6.25659	5.0898e-18	Down
Unigene39360	bZIP	3.41	4.49	5.79	0.75	2.72	2.29	1.19838	0.0521072	No Significant Difference
Unigene40181	bZIP	1.82	1.11	1.76	1.08	0.77	0.62	0.853382	0.275712	No Significant Difference
Unigene43996	bZIP	1.73	2.4	3.43	0.42	1.19	1.2	0.964228	0.218239	No Significant Difference
Unigene51574	bZIP	0	0	0	0	0	0	#N/A	#N/A	No Significant Difference
Unigene5467	bZIP	5.77	8.49	10.09	3.54	4.62	5.79	0.747638	0.0333471	No Significant Difference
Unigene55666	bZIP	0.36	1.01	0.11	0.44	0.55	0.33	#N/A	#N/A	No Significant Difference
Unigene57151	bZIP	14.03	8.97	11.31	2.7	8.22	9.35	0.7357	0.235909	No Significant Difference
Unigene61089	bZIP	0.13	0	0	0.12	0	0.49	#N/A	#N/A	No Significant Difference
Unigene63363	bZIP	0	0	0	0	0	0	#N/A	#N/A	No Significant Difference
Unigene6371	bZIP	16.8	20.07	26.04	15.13	19.08	15	0.0751372	0.804217	No Significant Difference
Unigene6433	bZIP	30.62	36.08	40.23	25.69	30.62	34.54	0.160469	0.544322	No Significant Difference
Unigene6538	bZIP	21.41	16.58	18.06	28.56	20.68	14.35	-0.290718	0.381921	No Significant Difference
Unigene74165	bZIP	0	0	0	0.15	0	0	#N/A	#N/A	No Significant Difference
Unigene8415	bZIP	0	0	0	0.06	0.17	0.06	#N/A	#N/A	No Significant Difference
Unigene87170	bZIP	0	0	0	0	0	0	#N/A	#N/A	No Significant Difference
Unigene89314	bZIP	0	0	0	0	0.21	0	#N/A	#N/A	No Significant Difference
Unigene8993	bZIP	4.03	4.7	5.11	6.41	9.17	9.69	-0.715034	0.0182428	No Significant Difference
Unigene90572	bZIP	0	0	0	0	0	0	#N/A	#N/A	No Significant Difference
Unigene91092	bZIP	0	0	0	0	0	0	#N/A	#N/A	No Significant Difference
Unigene9479	bZIP	346.57	280.31	288.19	212.29	296.11	299.43	0.106203	0.748197	No Significant Difference
Unigene99762	bZIP	0	0	0	0	0	0	#N/A	#N/A	No Significant Difference
Unigene102595	C2H2	0	0	0	0.25	0.25	0	#N/A	#N/A	No Significant Difference
Unigene103852	C2H2	0.28	0.25	0.52	0	0.76	0.52	#N/A	#N/A	No Significant Difference
Unigene10416	C2H2	2.69	3.5	2.26	1.52	2.22	2.09	0.473459	0.266844	No Significant Difference
Unigene104678	C2H2	0.29	0	0	0	0.26	1.05	#N/A	#N/A	No Significant Difference
Unigene105681	C2H2	0	0	0	0	0.52	0	#N/A	#N/A	No Significant Difference
Unigene105733	C2H2	0.29	0	0.27	6.42	0.54	1.13	#N/A	#N/A	No Significant Difference
Unigene11225	C2H2	0	0	0	0.06	0	0	#N/A	#N/A	No Significant Difference
Unigene11913	Nin-like	15.16	27.61	31.23	54.08	81.66	95.46	-1.33829	1.13643e-07	Down
Unigene11443	C2H2	5.79	14.32	15.19	12.74	23.45	16.75	-0.529263	0.361728	No Significant Difference
Unigene114804	C2H2	0	0	0	0	0	0	#N/A	#N/A	No Significant Difference
Unigene11778	C2H2	1.3	0.68	0.74	4.6	1.97	1.83	-1.70066	0.00989162	Down
Unigene122488	C2H2	0	0	0	0	0	0	#N/A	#N/A	No Significant Difference
Unigene12658	C2H2	28.8	19.87	24.44	26.48	25.66	20.15	0.39828	0.257779	No Significant Difference
Unigene128631	C2H2	0	0	0	0	0	0	#N/A	#N/A	No Significant Difference
Unigene132667	C2H2	0	0	0	0	0	0	#N/A	#N/A	No Significant Difference
Unigene121052	Nin-like	1.52	1.65	1.7	5.71	9.93	13.31	-2.61233	0.000480405	Down
Unigene135405	C2H2	0	0	0	0	0	0	#N/A	#N/A	No Significant Difference
Unigene13725	C2H2	17.81	9.82	11.5	10.36	12.87	13.72	-0.176601	0.619786	No Significant Difference
Unigene13850	C2H2	171.57	88.61	98.92	156.99	133.77	122.15	-0.333071	0.495974	No Significant Difference
Unigene139409	C2H2	0	0	0	0	0	0	#N/A	#N/A	No Significant Difference
Unigene1407	C2H2	10.44	11.74	12.19	6.47	5.41	7.7	-0.181415	0.544049	No Significant Difference
Unigene148537	C2H2	0	0	0.52	0	0	0	#N/A	#N/A	No Significant Difference
Unigene15012	C2H2	8.83	5.66	7.59	9.77	7.28	7.63	-0.449409	0.275321	No Significant Difference
Unigene15526	C2H2	19.71	23.97	20.47	16.07	15.63	14.78	-0.0731683	0.809843	No Significant Difference
Unigene15824	C2H2	8.44	9.91	9.26	7.27	7.69	4.53	0.44691	0.26822	No Significant Difference
Unigene15882	C2H2	0.55	0.25	0.81	0.04	0.28	0.2	#N/A	#N/A	No Significant Difference
Unigene16372	C2H2	0.04	0.67	0.15	7.98	1.73	1.16	-3.82869	0.000565406	Down
Unigene164491	C2H2	0	0	0	0	0.66	0	#N/A	#N/A	No Significant Difference
Unigene16978	C2H2	23.99	34.42	22.45	40.17	20.27	17.04	-0.60112	0.19675	No Significant Difference
Unigene170533	C2H2	0	0	0	0	0	0	#N/A	#N/A	No Significant Difference
Unigene172058	C2H2	0	0	0	0	0	0	#N/A	#N/A	No Significant Difference
Unigene179025	C2H2	0	0	0	0	0	0	#N/A	#N/A	No Significant Difference
Unigene18136	C2H2	0	0	0	0	0	0	#N/A	#N/A	No Significant Difference
Unigene18375	C2H2	0	0	0	0	0.16	0.04	#N/A	#N/A	No Significant Difference
Unigene18988	C2H2	23.15	19.79	20.61	13.92	20.81	21.02	0.13362	0.700862	No Significant Difference
Unigene190102	C2H2	1.29	0	0	0	0	0	#N/A	#N/A	No Significant Difference
Unigene19168	C2H2	0.81	0.41	0.58	5.33	1.28	0.68	-2.12614	0.0282724	Down
Unigene19492	C2H2	1.53	1	1.61	2.09	2.19	2.32	-0.746527	0.112446	No Significant Difference
Unigene19562	C2H2	16.99	17.72	20.71	24.35	16.18	16.41	-0.500955	0.167903	No Significant Difference
Unigene196408	C2H2	4.37	3.27	2.31	0	0	0	#N/A	#N/A	No Significant Difference
Unigene200619	C2H2	0	0	0	0	0	0	#N/A	#N/A	No Significant Difference
Unigene20267	C2H2	19.98	16.86	17.42	21.41	22.07	24.43	-0.384796	0.160975	No Significant Difference
Unigene20301	C2H2	1.22	0.67	2.19	3.41	2.88	6.42	-0.873164	0.209966	No Significant Difference
Unigene20450	C2H2	0	0	0	0	0	0	#N/A	#N/A	No Significant Difference
Unigene20704	C2H2	0.32	0.09	0.35	0	0.17	0.17	#N/A	#N/A	No Significant Difference
Unigene21578	C2H2	3.87	1.3	2.16	1.91	2.67	1.32	0.286502	0.718201	No Significant Difference
Unigene21914	C2H2	1.7	1.37	1.19	1.54	1.37	1.7	-0.168447	0.785731	No Significant Difference
Unigene22485	C2H2	3.18	2.04	3	0.76	0.86	1.18	1.5011	0.00252332	Up
Unigene22761	C2H2	1.33	1	1.39	1.52	2.9	3.16	-1.07418	0.0418393	Down
Unigene37475	Nin-like	4.28	2.94	3.38	7.6	6.62	6.32	-1.30067	0.00132379	Down
Unigene2377	C2H2	6.96	6.87	8.01	7.85	7.46	6.54	0.562791	0.0361094	No Significant Difference
Unigene23771	C2H2	0.65	0.87	0.98	3.71	2.79	2.47	-1.92346	7.62333e-05	Down
Unigene24794	C2H2	3.91	2.61	2.59	3.06	3.57	2.31	-0.0227793	0.970409	No Significant Difference
Unigene25298	C2H2	0.69	0.56	0.36	1.38	0.75	0.3	#N/A	#N/A	No Significant Difference
Unigene25825	C2H2	30.03	20.34	17.63	28.49	21.81	28.8	-0.701094	0.065234	No Significant Difference
Unigene25908	C2H2	9.67	9.71	11.11	9.12	8.29	7.5	0.169872	0.614748	No Significant Difference
Unigene28701	Nin-like	9.38	9.41	8.77	4.19	2.81	6.33	1.55808	0.000869003	Up
Unigene26799	C2H2	10.24	8.92	10.14	23.95	15.76	13.19	-0.902828	0.0253637	No Significant Difference
Unigene27335	C2H2	25.01	10.41	12.8	6.99	12.6	5.19	0.491011	0.45772	No Significant Difference
Unigene27358	C2H2	0	0	0	0	0	0	#N/A	#N/A	No Significant Difference
Unigene55773	Nin-like	29.09	45.38	54.32	11.61	15.86	14.49	1.26141	9.06878e-05	Up
Unigene27857	C2H2	0.58	0.56	0.45	0.05	0.05	0.22	#N/A	#N/A	No Significant Difference
Unigene27861	C2H2	0.4	0.25	0.59	0.28	0.18	0.23	#N/A	#N/A	No Significant Difference
Unigene30189	C2H2	0.12	0	0.06	0.06	0	0.41	#N/A	#N/A	No Significant Difference
Unigene30258	C2H2	0	0	0	0.06	0.35	0.06	#N/A	#N/A	No Significant Difference
Unigene30793	C2H2	2.92	2.92	3.26	3.25	2.55	0.84	0.368268	0.637715	No Significant Difference
Unigene31514	C2H2	9.52	7.9	8.04	7.24	8.49	7.7	0.0673809	0.865002	No Significant Difference
Unigene31610	C2H2	0.58	0.25	0.25	0	0.36	0.67	#N/A	#N/A	No Significant Difference
Unigene31705	C2H2	2.41	1.31	1.33	1.46	1.95	2.09	-0.155708	0.83467	No Significant Difference
Unigene31862	C2H2	0	0	0	0.12	0.37	0	#N/A	#N/A	No Significant Difference
Unigene32020	C2H2	10.13	16.06	10.05	4.23	6.34	6.95	0.698807	0.10639	No Significant Difference
Unigene32508	C2H2	3.1	1.61	4.76	10.36	7.7	2.64	-0.693502	0.331059	No Significant Difference
Unigene59368	Nin-like	4	7.1	7.59	2.05	1.23	1.57	2.03655	0.0012189	Up
Unigene33530	C2H2	0.08	0.15	0.07	0	0.06	0.07	#N/A	#N/A	No Significant Difference
Unigene33624	C2H2	0.07	0	0.11	0	0.99	0.21	#N/A	#N/A	No Significant Difference
Unigene34070	C2H2	0.49	0.2	0.81	0.26	0.52	0.33	#N/A	#N/A	No Significant Difference
Unigene34176	C2H2	10.45	5.71	5.35	3.13	4.86	5.16	0.647268	0.23293	No Significant Difference
Unigene34587	C2H2	11.23	7.99	10.47	15.16	7.73	13.25	-0.105859	0.848235	No Significant Difference
Unigene34893	C2H2	0.66	0.64	0.36	1.08	1.29	0.41	#N/A	#N/A	No Significant Difference
Unigene35557	C2H2	9.08	10.73	11.73	15.53	12.96	17.62	-0.738824	0.0120899	No Significant Difference
Unigene35899	C2H2	0.74	5	4.21	2.26	2.69	3.34	0.170768	0.858314	No Significant Difference
Unigene36541	C2H2	3	1.01	1.61	3.1	3.91	3.48	-0.942017	0.14626	No Significant Difference
Unigene63823	Nin-like	9.38	14.07	16.84	4.55	3.64	4.79	1.57966	0.000435079	Up
Unigene36632	C2H2	3.77	2.45	3.71	5.04	6.25	5.46	-0.81043	0.0519335	No Significant Difference
Unigene37084	C2H2	9.17	26.88	25.05	18.16	17.28	13.48	0.117953	0.846066	No Significant Difference
Unigene37289	C2H2	0.22	0	0.09	0	0.34	0.27	#N/A	#N/A	No Significant Difference
Unigene37852	C2H2	0	0	0	0	0	0.07	#N/A	#N/A	No Significant Difference
Unigene38150	C2H2	0.16	0.15	0.61	0.51	0.29	0.3	#N/A	#N/A	No Significant Difference
Unigene38258	C2H2	2.64	1.71	1.69	1.61	2.76	3.87	-0.64947	0.322917	No Significant Difference
Unigene38964	C2H2	1.53	0.27	1.46	0.22	0.38	0.55	#N/A	#N/A	No Significant Difference
Unigene3929	C2H2	11.04	16.04	17.96	5.31	9.89	8.55	0.846828	0.0148867	No Significant Difference
Unigene39500	C2H2	0	0	0	0	0.15	0	#N/A	#N/A	No Significant Difference
Unigene39955	C2H2	3.14	13.05	12.58	6.38	8.9	8.61	0.17965	0.808159	No Significant Difference
Unigene40096	C2H2	0.1	0	0.19	0	0.09	0	#N/A	#N/A	No Significant Difference
Unigene40691	C2H2	0	0	0	0.23	0.16	0.32	#N/A	#N/A	No Significant Difference
Unigene41207	C2H2	0.26	0	0.25	0.39	0.55	0.24	#N/A	#N/A	No Significant Difference
Unigene417	C2H2	2.93	5.49	6.11	2.87	3.56	4.17	0.374538	0.339373	No Significant Difference
Unigene41705	C2H2	0.69	0.25	0.42	0.8	0.72	2.51	#N/A	#N/A	No Significant Difference
Unigene42187	C2H2	0.44	0.08	0.25	1.21	0.65	0.41	#N/A	#N/A	No Significant Difference
Unigene44203	C2H2	0.09	0.17	0.09	1.27	1.02	1.64	#N/A	#N/A	No Significant Difference
Unigene4520	C2H2	1.94	4.74	6.66	3.63	8.2	6.61	-0.0033494	0.995808	No Significant Difference
Unigene46298	C2H2	1.75	0.65	1.21	1.02	1.49	1.66	#N/A	#N/A	No Significant Difference
Unigene47316	C2H2	1.48	0.09	0.76	0	0.27	0.09	#N/A	#N/A	No Significant Difference
Unigene47593	C2H2	0.6	1.04	0.76	0	0	0	#N/A	#N/A	No Significant Difference
Unigene4790	C2H2	1.15	0.81	1.08	0.82	0.44	0.52	0.726469	0.305929	No Significant Difference
Unigene48674	C2H2	17.7	9.09	11.57	8.17	12.92	11.64	-0.0194929	0.974055	No Significant Difference
Unigene48914	C2H2	0	0	0	0	0	0	#N/A	#N/A	No Significant Difference
Unigene49303	C2H2	0	0.29	0.2	1.15	0.77	0.39	#N/A	#N/A	No Significant Difference
Unigene49620	C2H2	0.44	0.27	0.45	1.61	0.93	1.37	#N/A	#N/A	No Significant Difference
Unigene49857	C2H2	0	0	0	0	0.19	0	#N/A	#N/A	No Significant Difference
Unigene55052	C2H2	4.26	2.54	3.7	1.43	0.33	0.79	2.0363	0.0114203	Up
Unigene58616	C2H2	24.49	12.06	9.84	10.29	10.54	6.33	0.732501	0.235375	No Significant Difference
Unigene59218	C2H2	0	0	0	0	0.23	0	#N/A	#N/A	No Significant Difference
Unigene59517	C2H2	0	0	0	0	0	0	#N/A	#N/A	No Significant Difference
Unigene60297	C2H2	1.82	0.86	1.99	0	0	0	#N/A	#N/A	No Significant Difference
Unigene61105	C2H2	0	0	0	0.49	0.12	0.86	#N/A	#N/A	No Significant Difference
Unigene6166	C2H2	13.92	27.16	33.06	7.92	13.31	13.79	0.655074	0.113477	No Significant Difference
Unigene63885	C2H2	0	0.26	0	0	0	0	#N/A	#N/A	No Significant Difference
Unigene63975	C2H2	0	0	0	0.13	0	0	#N/A	#N/A	No Significant Difference
Unigene64376	C2H2	0	0	0	0	0	0	#N/A	#N/A	No Significant Difference
Unigene64655	C2H2	0.5	4.96	2.32	2.19	2.6	3.17	-0.072498	0.956183	No Significant Difference
Unigene6481	C2H2	0.19	0.43	1.3	0.34	0.32	0.32	#N/A	#N/A	No Significant Difference
Unigene6528	C2H2	3.85	5.98	4.15	9.66	7.27	8.63	-0.957667	0.00319353	No Significant Difference
Unigene67523	C2H2	0	0	0	0	0	0	#N/A	#N/A	No Significant Difference
Unigene67972	C2H2	0	0	0	0	0	0	#N/A	#N/A	No Significant Difference
Unigene69848	C2H2	0	0	0	0.14	0.14	2.19	#N/A	#N/A	No Significant Difference
Unigene7036	C2H2	4.48	5.15	5.76	6.42	6.96	5.02	-0.0568507	0.890454	No Significant Difference
Unigene73265	C2H2	0	0	0	0	0.15	0	#N/A	#N/A	No Significant Difference
Unigene73646	C2H2	0	0.16	0.16	0	0	0	#N/A	#N/A	No Significant Difference
Unigene75961	C2H2	2.98	1.95	0.66	0	0	0	#N/A	#N/A	No Significant Difference
Unigene7650	C2H2	3.62	2.56	3.29	4.2	3.41	3.01	-0.167209	0.702649	No Significant Difference
Unigene7772	C2H2	6.19	8.2	6.59	6.52	5.83	6.13	0.104262	0.758935	No Significant Difference
Unigene7986	C2H2	10.79	20.59	22.56	10.53	12.12	15.01	0.254448	0.543615	No Significant Difference
Unigene80135	C2H2	0	0.17	0	0	0	0	#N/A	#N/A	No Significant Difference
Unigene8028	C2H2	1.48	2.72	3.21	0.91	1.32	0.84	1.18965	0.00989976	Up
Unigene8368	C2H2	17.29	21.93	24.65	21.87	30.28	22.24	-0.388816	0.153335	No Significant Difference
Unigene84573	C2H2	0	0	0	0	0	0	#N/A	#N/A	No Significant Difference
Unigene86111	C2H2	0	0	0.39	0	0	0	#N/A	#N/A	No Significant Difference
Unigene87017	C2H2	0	0	0	0	0	0	#N/A	#N/A	No Significant Difference
Unigene90833	C2H2	0	0	0	0	0	0	#N/A	#N/A	No Significant Difference
Unigene911	C2H2	5.28	7.41	7.89	5.47	5.55	6.01	0.195925	0.4768	No Significant Difference
Unigene91169	C2H2	0	4.19	8.11	0.29	0.29	0	#N/A	#N/A	No Significant Difference
Unigene96008	C2H2	0	0	0	0	0	0	#N/A	#N/A	No Significant Difference
Unigene96591	C2H2	0.25	0.23	0	1.13	0.22	0	#N/A	#N/A	No Significant Difference
Unigene7897	Nin-like	27.39	20.96	41.58	8.25	8.35	8.83	2.01605	1.14683e-07	Up
Unigene99891	C2H2	0	0	0	0	0	0	#N/A	#N/A	No Significant Difference
Unigene101322	C3H	0	0	0	0	0	0	#N/A	#N/A	No Significant Difference
Unigene10373	C3H	17.78	17.15	21.23	8.43	12.57	15.24	0.613727	0.0536951	No Significant Difference
Unigene10636	C3H	40.12	33.28	35.85	32.04	30.39	31.96	0.0154847	0.968175	No Significant Difference
Unigene10738	C3H	0.12	0.53	0.64	1.53	1.05	1.23	-1.95434	0.00620028	Down
Unigene111023	C3H	0	0	0	0	0.28	0.29	#N/A	#N/A	No Significant Difference
Unigene11843	C3H	3.33	17.87	16.73	2.07	6.81	9.11	0.959619	0.246556	No Significant Difference
Unigene12080	C3H	13.08	20.34	21.21	18.54	18.53	19.59	-0.190608	0.47828	No Significant Difference
Unigene17913	NF-YC	60.92	23.21	44.05	6.26	20	31.22	1.39929	0.0289351	Up
Unigene121310	C3H	0	0	0.34	0	0	0	#N/A	#N/A	No Significant Difference
Unigene121464	C3H	0	0	0	0	0.67	0	#N/A	#N/A	No Significant Difference
Unigene12160	C3H	6.56	8.99	10.22	4.06	4.52	5.79	0.770822	0.00915319	No Significant Difference
Unigene13018	C3H	40.4	26.29	29.16	21.68	21.68	20.7	0.406707	0.0427898	No Significant Difference
Unigene133879	C3H	6.59	15.21	15.72	3.35	3.34	7.15	1.02257	0.229834	No Significant Difference
Unigene138223	C3H	0.51	0.43	0	0	0	0	#N/A	#N/A	No Significant Difference
Unigene138676	C3H	0	0	0	0	0	0	#N/A	#N/A	No Significant Difference
Unigene14227	C3H	5.16	4.75	4.98	4.8	4.78	4.4	-0.126095	0.723335	No Significant Difference
Unigene145376	C3H	0	0	0	0	0	0	#N/A	#N/A	No Significant Difference
Unigene145471	C3H	0	0	0	0	0	0.5	#N/A	#N/A	No Significant Difference
Unigene18842	NF-YC	1.01	4.13	2.67	9.64	4.1	4.56	-1.52098	0.0202831	Down
Unigene146805	C3H	0	0	0	0	0.5	0	#N/A	#N/A	No Significant Difference
Unigene147735	C3H	0	0	0	0	0	0	#N/A	#N/A	No Significant Difference
Unigene150841	C3H	0	0	0	0	0	0.55	#N/A	#N/A	No Significant Difference
Unigene26061	NF-YC	7.45	13.07	7.45	36.69	16.94	14.42	-1.57605	0.00391198	Down
Unigene156227	C3H	0	1.13	1.18	0	0	0	#N/A	#N/A	No Significant Difference
Unigene157779	C3H	0	0	0	0	0	0	#N/A	#N/A	No Significant Difference
Unigene15973	C3H	11.41	22.29	16.4	24.86	22.02	25.77	-0.548739	0.130422	No Significant Difference
Unigene16275	C3H	3.34	9.42	8.32	11.27	11.99	12.98	-0.661281	0.216089	No Significant Difference
Unigene166313	C3H	0	0	0	0	0	0	#N/A	#N/A	No Significant Difference
Unigene17045	C3H	5.74	5.86	5.54	4.97	6.25	6.05	0.232885	0.536398	No Significant Difference
Unigene17168	C3H	0	0	0.08	0	0.26	0.04	#N/A	#N/A	No Significant Difference
Unigene177732	C3H	0	0	0	0	0	0	#N/A	#N/A	No Significant Difference
Unigene1871	C3H	14.28	61.48	54.85	16.83	31.23	41.42	0.306223	0.61266	No Significant Difference
Unigene18923	C3H	23.18	28.62	29.64	19.07	16.46	17.13	0.0805583	0.819668	No Significant Difference
Unigene1899	C3H	8.08	10.9	11.41	10.64	10.44	8.73	-0.039514	0.926523	No Significant Difference
Unigene191269	C3H	1.32	0	0	0	0	1.1	#N/A	#N/A	No Significant Difference
Unigene193170	C3H	0	0	0	0	0	0	#N/A	#N/A	No Significant Difference
Unigene195387	C3H	0	0	0	0	1.12	1.19	#N/A	#N/A	No Significant Difference
Unigene19877	C3H	5.96	5.65	6.78	8.67	7.31	8.85	-0.53233	0.0815537	No Significant Difference
Unigene20802	C3H	0.98	0.31	1.61	2.04	1.5	1.48	-0.699305	0.372485	No Significant Difference
Unigene2153	C3H	7.22	20.11	20.95	5.78	9.16	12.11	0.327573	0.480996	No Significant Difference
Unigene25210	C3H	0.42	0.97	0.82	0.44	0.94	0.75	#N/A	#N/A	No Significant Difference
Unigene26794	C3H	0	0	0	0.52	2.31	3.22	-7.67361	1.31405e-06	Down
Unigene26947	C3H	0.06	0	0	0.05	0	0	#N/A	#N/A	No Significant Difference
Unigene28912	C3H	0.24	0.52	0.52	0	0	0.11	#N/A	#N/A	No Significant Difference
Unigene29010	C3H	2.79	2.68	2.93	1.36	2.44	1.61	0.587043	0.242896	No Significant Difference
Unigene30008	C3H	4.32	10.36	12.48	3.74	4.12	6.09	0.986774	0.0832007	No Significant Difference
Unigene3117	C3H	7.26	23.59	26.67	9.39	12.35	15.38	0.0949561	0.893139	No Significant Difference
Unigene31258	C3H	58.7	45.15	58.95	26.04	33.42	38.28	0.476103	0.125614	No Significant Difference
Unigene42484	NF-YB	1.49	7.87	3.55	18.98	10.8	7.14	-1.65333	0.0259824	Down
Unigene3223	C3H	28.97	29.38	29.04	24.32	28.94	29.39	0.136751	0.648228	No Significant Difference
Unigene34149	C3H	0	0.27	0.14	0	0	0	#N/A	#N/A	No Significant Difference
Unigene34183	C3H	0.98	0.88	0.82	0.2	0.07	0	#N/A	#N/A	No Significant Difference
Unigene3609	C3H	16.86	15.77	18.65	15.31	9.86	16.55	0.320286	0.201036	No Significant Difference
Unigene36711	C3H	0	0	0	0	0.21	0.07	#N/A	#N/A	No Significant Difference
Unigene39350	C3H	0	0.08	0	0	0.23	0.08	#N/A	#N/A	No Significant Difference
Unigene41840	C3H	4.18	2.07	3.63	0.89	1.46	0.89	1.33323	0.0475217	Up
Unigene4209	C3H	25.92	16.17	17.71	23.18	25.23	24.46	-0.363312	0.341961	No Significant Difference
Unigene43304	C3H	0.2	5.68	6.88	0.91	2.55	2.85	0.958597	0.450392	No Significant Difference
Unigene44173	C3H	7.21	29.78	25.1	8.19	11.75	17.37	0.656	0.310757	No Significant Difference
Unigene44429	C3H	0	0.53	0.27	0	0	0	#N/A	#N/A	No Significant Difference
Unigene4472	C3H	24.4	21.63	22.35	37.42	22.17	22.41	0.0341635	0.937112	No Significant Difference
Unigene4295	GeBP	1.02	0.87	1.85	0.46	1.01	0.83	-1.51603	0.0263672	Down
Unigene4703	C3H	12.92	24.2	25.84	18.14	24.38	24.24	-0.164176	0.677554	No Significant Difference
Unigene4762	C3H	21.31	21.06	22.04	12.21	13.78	19.17	0.283625	0.336615	No Significant Difference
Unigene48726	C3H	0	0	0	2.07	0.57	0.1	#N/A	#N/A	No Significant Difference
Unigene490	C3H	5.99	14.21	14.07	7.3	9.56	11.64	0.184278	0.707051	No Significant Difference
Unigene49021	C3H	0	0	0	0.18	0.38	0	#N/A	#N/A	No Significant Difference
Unigene5118	C3H	6.51	5.41	4.59	8.81	9.11	7.64	0.107351	0.765142	No Significant Difference
Unigene53265	C3H	3.27	1.49	1.95	0.94	1.15	0.95	#N/A	#N/A	No Significant Difference
Unigene5645	C3H	28.66	35.01	32.07	14.02	18.35	21.13	0.652654	0.00665569	No Significant Difference
Unigene49286	HB-other	0.66	0.31	0.42	1.72	2.55	1.89	-2.1915	0.00642546	Down
Unigene6137	C3H	8.41	12.95	14.98	10.71	12.1	11.67	-0.123644	0.702936	No Significant Difference
Unigene9567	NF-YA	5.06	2.95	4.22	1.35	1.36	1.92	1.30105	0.00288751	Up
Unigene62792	C3H	0	0	0.13	0.25	0.25	0.51	#N/A	#N/A	No Significant Difference
Unigene63771	C3H	0	0.52	0.53	0	0	0	#N/A	#N/A	No Significant Difference
Unigene6438	C3H	0	1.02	1.55	0	0	0	7.52728	0.106049	No Significant Difference
Unigene65390	C3H	0	0	0	0	0.13	0	#N/A	#N/A	No Significant Difference
Unigene18915	NAC	13.43	7.3	10.13	19.21	13.87	17.35	-1.00237	0.0234009	Down
Unigene6741	C3H	18.61	24.55	29.81	15.32	19.36	24.95	0.340512	0.311889	No Significant Difference
Unigene6867	C3H	13.78	21.64	21.79	5.76	9.72	12.57	0.895669	0.0144696	No Significant Difference
Unigene7196	C3H	0	0	0.42	1.87	0.94	0.74	#N/A	#N/A	No Significant Difference
Unigene7335	C3H	8.64	8.27	7.82	6.21	7.69	6.87	0.195379	0.49894	No Significant Difference
Unigene75911	C3H	0	0	0.49	0	0	0	#N/A	#N/A	No Significant Difference
Unigene11534	NAC	1.38	1.16	1.23	4.87	2.34	4.34	-1.69173	0.000347224	Down
Unigene9047	C3H	6.17	11.34	11.7	2.32	5.46	6.58	0.868099	0.0591069	No Significant Difference
Unigene90652	C3H	0	0	0	0	0	0	#N/A	#N/A	No Significant Difference
Unigene91105	C3H	0	0	0	0	0	0	#N/A	#N/A	No Significant Difference
Unigene91135	C3H	5.23	5.14	4.54	0	0	0.54	#N/A	#N/A	No Significant Difference
Unigene11556	NAC	10.15	9.45	11.47	17.95	18.78	22.48	-1.56967	8.77064e-13	Down
Unigene91889	C3H	0	0	0	0	0.21	0.21	#N/A	#N/A	No Significant Difference
Unigene12869	NAC	22.49	22.39	19.9	45.48	34.63	39.29	-1.33586	1.41551e-06	Down
Unigene95060	C3H	0	0	0	0	0	0	#N/A	#N/A	No Significant Difference
Unigene16290	NAC	6.67	7.02	7.93	1.78	2.77	3.36	1.33857	4.60637e-05	Up
Unigene113953	CAMTA	4.37	3.27	1.53	0	0	0	#N/A	#N/A	No Significant Difference
Unigene2987	CAMTA	6.75	6.51	8.38	4.89	6.73	6.43	0.0789838	0.803458	No Significant Difference
Unigene4064	CAMTA	9.85	33.98	32.01	13.1	21.1	24.29	0.397495	0.599723	No Significant Difference
Unigene22254	NAC	2.64	1.87	1.48	15.75	4.07	4.81	-2.13474	0.0027303	Down
Unigene23003	NAC	30.36	25.65	24.84	13.44	11.91	12.29	1.05763	0.000113177	Up
Unigene15227	CO-like	21.05	28.58	25.21	19.58	19.69	16.52	0.342777	0.205053	No Significant Difference
Unigene18109	CO-like	4.41	1.66	1.73	1.62	3.54	8.38	-0.689741	0.50518	No Significant Difference
Unigene3569	MYB_related	2.43	2.5	2	8.62	5.94	5.82	-1.85388	3.63917e-10	Down
Unigene2235	CO-like	69.97	61.17	57.93	30.69	34.18	35.31	0.480438	0.040373	No Significant Difference
Unigene8535	CO-like	15.8	13.11	10.04	9.11	12.1	7.07	0.353985	0.375274	No Significant Difference
Unigene15663	CPP	5.89	4.28	3.8	1.29	1.08	0.69	0.371655	0.581931	No Significant Difference
Unigene1767	CPP	17.46	14.47	16.01	14.6	16.82	18.75	-0.327323	0.159445	No Significant Difference
Unigene3499	CPP	10.51	5.79	6.29	6.79	4.63	4.68	0.451423	0.104689	No Significant Difference
Unigene60415	CPP	0.13	0.74	0.75	0.36	0.36	0.61	#N/A	#N/A	No Significant Difference
Unigene10706	DBB	38.13	40.58	38.22	22.4	30.04	28.44	0.571567	0.00673488	No Significant Difference
Unigene11588	DBB	17.29	14.91	16.15	7.54	6.89	4.55	0.666163	0.0705167	No Significant Difference
Unigene1282	DBB	94.19	62.21	81.06	39.42	41.33	41.03	0.487215	0.0555666	No Significant Difference
Unigene13900	DBB	74.8	69.34	74.38	36.13	56.31	64.44	0.277646	0.428648	No Significant Difference
Unigene47589	M-type_MADS	0.7	0	0.29	7.17	6.27	5.78	-4.35311	4.42579e-08	Down
Unigene18501	DBB	0.28	0.09	0.17	0.04	0.78	0.42	#N/A	#N/A	No Significant Difference
Unigene19294	DBB	37.78	63.67	59.61	42.53	59.04	49.06	0.110614	0.690454	No Significant Difference
Unigene22559	DBB	12.74	36.03	33.83	27.53	28.4	33.22	-0.423987	0.381043	No Significant Difference
Unigene2557	DBB	44.34	44.05	48.78	24.07	26.48	26.31	0.644255	0.000613663	No Significant Difference
Unigene55046	DBB	41.09	101.19	113.93	88.13	113.5	105.92	-0.337295	0.488123	No Significant Difference
Unigene60823	DBB	24.34	40.81	42.28	50.71	49.67	49.97	-0.564785	0.0723504	No Significant Difference
Unigene8862	DBB	101.62	128.43	103.17	152.62	78.86	82.71	-0.666685	0.155554	No Significant Difference
Unigene10563	Dof	3.07	1.43	3.24	2.13	4.03	4.67	-0.49722	0.390116	No Significant Difference
Unigene10656	Dof	4.88	6.58	6.15	7.32	7.25	7.38	-0.385482	0.151364	No Significant Difference
Unigene12363	Dof	23.8	18.81	18.56	26.83	18.4	17.2	-0.052125	0.914668	No Significant Difference
Unigene13898	Dof	6.73	9.23	10.28	6.59	10.04	10.47	0.157615	0.709675	No Significant Difference
Unigene15692	Dof	16.84	15.54	15.85	26.53	28.93	27.55	-0.735758	0.000958062	No Significant Difference
Unigene1625	Dof	25.09	26.8	28.47	13.55	16.44	16.46	0.936914	2.94927e-07	No Significant Difference
Unigene18219	Dof	3.94	3.5	4.45	0.96	1.93	2.18	1.18436	0.00680244	Up
Unigene18369	Dof	4.16	4.25	4.49	1.97	3.44	2.78	0.524213	0.168675	No Significant Difference
Unigene18446	Dof	1.07	3.08	2.02	6.8	3.78	2.92	-1.25332	0.0609893	No Significant Difference
Unigene18607	Dof	1.5	3.03	2.73	1.56	1.69	1.5	0.530583	0.283099	No Significant Difference
Unigene21497	Dof	0.84	1.17	1.4	0.82	0.52	0.61	0.707255	0.293664	No Significant Difference
Unigene23502	Dof	0.05	0.38	0.24	0	0.19	0.24	#N/A	#N/A	No Significant Difference
Unigene23579	Dof	21.84	18.88	19.18	15.57	16.36	15.51	0.480342	0.105358	No Significant Difference
Unigene23605	Dof	1	1.69	2.29	1.45	1.08	1.75	-0.119788	0.859492	No Significant Difference
Unigene24727	Dof	23.57	20.49	23.62	14.02	15.57	13.97	0.567239	0.0294229	No Significant Difference
Unigene26459	Dof	3.48	2.79	2.71	2.64	2.9	2	0.0096193	0.988195	No Significant Difference
Unigene27434	Dof	2.24	1.54	1.9	0.65	0.86	0.55	1.37889	0.0222833	Up
Unigene29029	Dof	1.5	0.87	1.05	2.07	1.91	0.91	-0.578385	0.451249	No Significant Difference
Unigene29584	Dof	0.97	1.7	1.21	0.73	0.6	1.14	0.626769	0.408263	No Significant Difference
Unigene29627	Dof	38.78	21.47	32.81	16.15	20.38	17.52	0.651798	0.0779829	No Significant Difference
Unigene31404	Dof	0.58	1.92	1.5	12.92	4.65	4.51	-2.59197	0.000197246	Down
Unigene33054	Dof	0.61	0.59	0.32	0.14	0.13	0.07	#N/A	#N/A	No Significant Difference
Unigene33182	MYB_related	330.07	95.81	116	72.36	63.12	37.43	1.64045	0.00690669	Up
Unigene37173	Dof	2.75	1.46	2.07	3.98	1.57	0.94	-0.134673	0.896099	No Significant Difference
Unigene38165	Dof	0.08	0.23	0.08	0.07	0.08	0	#N/A	#N/A	No Significant Difference
Unigene40680	Dof	2.86	1.92	1.86	1.17	0.7	0.95	1.17719	0.0860984	No Significant Difference
Unigene50773	Dof	4.7	0.51	2.05	1.18	2.37	1.3	0.569784	0.625512	No Significant Difference
Unigene53734	Dof	1.14	0.43	0.54	0	0	0	#N/A	#N/A	No Significant Difference
Unigene18162	NAC	0	0.05	0	1	2.37	2.52	-6.85566	1.90209e-06	Down
Unigene68806	Dof	2.76	15.08	10.42	10.45	9.63	9.88	-0.134061	0.877814	No Significant Difference
Unigene6948	Dof	2.58	4.72	4.73	2.72	2.98	2.92	0.399264	0.291456	No Significant Difference
Unigene7643	Dof	17	15.14	19.13	11.85	13.65	11.25	0.448288	0.0561047	No Significant Difference
Unigene85965	Dof	1.67	0	1.35	0.38	0.19	1.4	#N/A	#N/A	No Significant Difference
Unigene8668	Dof	8.1	9.76	10.95	8.62	9.69	9.72	-0.00303976	0.992412	No Significant Difference
Unigene96481	Dof	0	0	0	0.45	0.22	0	#N/A	#N/A	No Significant Difference
Unigene128804	E2F/DP	0	0	0	0	0	0	#N/A	#N/A	No Significant Difference
Unigene136392	E2F/DP	0	1.25	0	0	0.42	0.44	#N/A	#N/A	No Significant Difference
Unigene15802	E2F/DP	0.74	1.03	1.03	4.02	2.03	1.78	-1.53475	0.0116681	Down
Unigene23672	E2F/DP	1.09	1.85	0.68	0.87	0.99	0.9	-1.12993	0.184623	No Significant Difference
Unigene40484	E2F/DP	0	0	0	0	0.16	0	#N/A	#N/A	No Significant Difference
Unigene291	EIL	81.01	109.82	114.81	64.98	83.2	93.88	0.277817	0.314888	No Significant Difference
Unigene3676	EIL	31.34	40.07	38.28	26.64	29.75	29.21	0.110194	0.636346	No Significant Difference
Unigene3749	MYB_related	2.65	4.78	4.43	20.46	7.18	4.67	-1.76001	0.00670981	Down
Unigene7136	EIL	76.47	143.55	156.02	37.23	92.08	112.08	0.5777	0.270805	No Significant Difference
Unigene12250	ERF	7.47	8.95	11.03	6.22	6.94	6.84	0.295649	0.303464	No Significant Difference
Unigene123533	ERF	0	0	0	0	0	0	#N/A	#N/A	No Significant Difference
Unigene124665	ERF	0	0	0	0.36	0	0	#N/A	#N/A	No Significant Difference
Unigene12648	ERF	116.89	80.13	87.24	38.67	38.46	41.71	0.071119	0.878335	No Significant Difference
Unigene13386	ERF	23.09	41.43	33.02	15.9	29.11	34.23	-0.0152842	0.963086	No Significant Difference
Unigene134144	ERF	0	0	0	0	0	0	#N/A	#N/A	No Significant Difference
Unigene134188	ERF	0	0.41	0.84	0	0.82	0.42	#N/A	#N/A	No Significant Difference
Unigene13758	ERF	10.78	21.57	22.55	4.99	10.74	14.09	0.959429	0.0933975	No Significant Difference
Unigene142172	ERF	0	0	0.94	0.47	0.92	0	#N/A	#N/A	No Significant Difference
Unigene42422	MYB_related	8.62	12.59	9.08	32.46	20.92	17.64	-1.40417	0.000694751	Down
Unigene15628	ERF	1.62	2.15	1.88	0.95	0.71	0.61	1.36279	0.00473928	Up
Unigene15719	ERF	91.51	51.78	49.7	62.37	65.49	52.54	-0.215348	0.646477	No Significant Difference
Unigene157610	ERF	0	0	0	0	0	0	#N/A	#N/A	No Significant Difference
Unigene1616	ERF	7.54	7.92	9.66	9.07	10.83	12.74	-0.643177	0.0135094	No Significant Difference
Unigene162659	ERF	0	0.62	0.65	0	0	0	#N/A	#N/A	No Significant Difference
Unigene16501	ERF	65.82	42.34	44.85	35.08	49.19	43.91	0.220889	0.587205	No Significant Difference
Unigene17087	ERF	1.03	0.73	0.46	1.89	1.15	1.04	-0.942134	0.184669	No Significant Difference
Unigene17333	ERF	39.3	32.4	37.13	23.43	29.13	18.88	0.564872	0.0782129	No Significant Difference
Unigene185811	ERF	0	0.91	0.96	0	0	0	#N/A	#N/A	No Significant Difference
Unigene18684	ERF	0.04	0.19	0.08	0.5	2.07	0.97	#N/A	#N/A	No Significant Difference
Unigene193925	ERF	0	0	0	0	0	0	#N/A	#N/A	No Significant Difference
Unigene19778	ERF	89.46	127.15	140.25	66.09	91.64	63.89	0.330265	0.18251	No Significant Difference
Unigene20275	ERF	28.18	9.41	16.6	5.6	9.08	6.99	0.784503	0.141063	No Significant Difference
Unigene20476	ERF	4.96	7.41	4.87	12.89	12.68	8.98	-0.777012	0.064985	No Significant Difference
Unigene20776	ERF	2.4	2.15	3.16	4.07	3.35	3.89	-0.732932	0.0927164	No Significant Difference
Unigene21022	ERF	8.94	10.23	14.11	3.26	3.24	2.84	0.855338	0.042882	No Significant Difference
Unigene21201	ERF	1.76	2.82	2.17	2.05	1.62	1.24	0.324196	0.606052	No Significant Difference
Unigene21351	ERF	0.28	0.13	0.09	1.55	1.04	1.83	-3.1983	5.53762e-05	Down
Unigene21462	ERF	8.97	8.27	10.6	4.38	8.28	10.28	0.0663082	0.897255	No Significant Difference
Unigene22759	ERF	0.88	0.64	0.28	0	0.05	0.05	#N/A	#N/A	No Significant Difference
Unigene22980	ERF	41.69	25.02	29.47	11.93	17.54	17.93	0.855708	0.0294323	No Significant Difference
Unigene23104	ERF	3.45	2.47	2.11	2.48	4.43	3.44	-0.401293	0.451695	No Significant Difference
Unigene5174	NAC	0.77	0.93	0.5	3.94	2.92	2.24	-2.57099	9.43357e-07	Down
Unigene23649	ERF	32.55	26.08	22.29	23.97	17.71	19.84	0.339832	0.366285	No Significant Difference
Unigene23724	ERF	1.59	1.89	1.39	3.21	2.45	1.75	-0.744716	0.239272	No Significant Difference
Unigene23751	ERF	9.61	7.18	9.4	4.41	9.54	8.94	0.157649	0.757374	No Significant Difference
Unigene24228	ERF	101.71	59.71	63.62	45.02	77.92	32.14	0.173455	0.759111	No Significant Difference
Unigene44280	MYB_related	10.84	15.12	8.49	2.55	4.95	3.36	1.61775	0.000275813	Up
Unigene24494	ERF	5.57	3.75	4.11	11.26	7.36	3.68	-0.810316	0.194137	No Significant Difference
Unigene24539	ERF	51.04	40.72	47.13	51.52	48.64	45.31	0.0515963	0.886906	No Significant Difference
Unigene25014	ERF	141.68	109.43	118.61	159.17	152.12	145.09	-0.552144	0.083551	No Significant Difference
Unigene25167	ERF	1.83	0.8	1.56	2.68	1.44	1.88	-0.511919	0.533791	No Significant Difference
Unigene25729	ERF	105.39	68.67	88.14	43.24	52.27	48.4	0.778537	0.00903958	No Significant Difference
Unigene25767	ERF	0	0	0.05	0	0.05	0	#N/A	#N/A	No Significant Difference
Unigene25843	ERF	109.79	78.33	77.14	60.2	64.72	59.3	0.37398	0.299884	No Significant Difference
Unigene25930	ERF	0.49	1.04	0.9	2.22	1.68	1.69	-1.29054	0.0287021	Down
Unigene25946	ERF	18.57	12.78	13.66	9.42	9.87	8.73	0.780778	0.0281166	No Significant Difference
Unigene25977	ERF	113.56	56.92	83.24	2.12	1.48	0.79	3.74579	4.95473e-12	Up
Unigene26202	ERF	2.02	3.48	2.88	4.62	2.22	2.71	-1.1034	0.0680654	No Significant Difference
Unigene26618	ERF	17.36	4.41	5.38	7.27	8.31	9.63	-0.0697423	0.931893	No Significant Difference
Unigene26812	ERF	90.99	60.34	71.78	60.79	71.71	40.04	0.0541663	0.914157	No Significant Difference
Unigene27106	ERF	43.54	49.55	42.78	23.03	23.06	26.9	0.36106	0.1462	No Significant Difference
Unigene27121	ERF	0.69	0.55	0.56	0.05	0.27	0.16	#N/A	#N/A	No Significant Difference
Unigene27911	ERF	10.12	10.71	11.34	4.04	7.57	8.43	0.657779	0.0855704	No Significant Difference
Unigene28591	ERF	45.08	20.08	21.42	20.66	27.8	22.6	0.263158	0.645353	No Significant Difference
Unigene28673	ERF	1.28	0.75	2.07	1.23	1.26	2.24	-0.294236	0.722046	No Significant Difference
Unigene28708	ERF	30.48	35.97	43.79	14.69	19.72	20.25	0.956922	0.00135514	No Significant Difference
Unigene29262	ERF	3.02	2.15	1.94	2.03	1.36	1.94	0.361328	0.56389	No Significant Difference
Unigene29383	ERF	0.67	1.34	1.06	0	1.19	0.34	#N/A	#N/A	No Significant Difference
Unigene29437	ERF	40.78	20.47	31.58	16.43	24.17	36.42	0.158839	0.775331	No Significant Difference
Unigene29477	ERF	0.54	0.89	0.57	2.28	0.46	0.69	#N/A	#N/A	No Significant Difference
Unigene30490	ERF	1.95	1.21	1.1	2.45	1.12	1.72	-0.379919	0.632069	No Significant Difference
Unigene14273	MYB	1.55	8.33	1.68	47.79	14.53	7.88	-3.03944	0.000168033	Down
Unigene31414	ERF	13.21	7.94	9.46	9.48	9	7.23	0.307825	0.513069	No Significant Difference
Unigene31428	ERF	8.24	8.74	11.57	3.36	5.69	7.28	0.686616	0.122702	No Significant Difference
Unigene31442	ERF	0.13	0.12	0.25	0.18	0.18	0.06	#N/A	#N/A	No Significant Difference
Unigene25257	Nin-like	0	0	0	2.78	4.9	5.05	-8.7043	1.41458e-10	Down
Unigene32686	ERF	1.08	1.78	1.14	1.95	2.26	2.8	-0.679193	0.312441	No Significant Difference
Unigene32726	ERF	74.46	21.41	29.43	11.22	14.47	21.03	0.990801	0.109458	No Significant Difference
Unigene33388	ERF	0.82	0.26	0.53	0.57	1.03	0.65	#N/A	#N/A	No Significant Difference
Unigene33895	ERF	412.56	253.51	256.36	228.31	300.77	234.76	0.0609741	0.898954	No Significant Difference
Unigene3413	ERF	2.92	1.47	3.3	0.35	1.67	2.58	0.403038	0.628955	No Significant Difference
Unigene34179	ERF	1.6	1.06	1.48	1.4	1.4	1.43	-0.329062	0.645353	No Significant Difference
Unigene34418	ERF	15.17	12.4	14.05	16.06	14.94	14.96	-0.341053	0.368621	No Significant Difference
Unigene34692	ERF	0.95	1.61	1.51	3.88	3.48	2.81	-1.57383	0.00600357	Down
Unigene3529	ERF	12.76	15.02	15.54	8.07	7.96	8.69	0.778495	0.000253045	No Significant Difference
Unigene35315	ERF	31.93	13.86	21.91	10.07	43.82	82.76	-0.911387	0.274576	No Significant Difference
Unigene35334	ERF	16.11	10.34	7.93	1.55	0.64	0.1	3.86239	5.09429e-06	Up
Unigene35490	ERF	0.29	0.56	0.28	0	0	0	#N/A	#N/A	No Significant Difference
Unigene35976	ERF	0.15	0.28	0	0.14	0.14	0	#N/A	#N/A	No Significant Difference
Unigene34688	MYB	5.6	10.46	7.88	51.28	15.57	17.32	-2.41834	3.1871e-05	Down
Unigene36474	ERF	1.05	2.15	0.58	8.01	2.66	2.05	-1.85737	0.0343342	Down
Unigene36525	ERF	3.27	3.23	1.85	7.78	1.69	3.9	-0.823722	0.336921	No Significant Difference
Unigene36933	ERF	4.18	2.91	1.76	1.83	3.19	3.5	0.0309541	0.968511	No Significant Difference
Unigene37203	ERF	29.55	14.94	14.57	35.51	23.5	19.09	-0.453687	0.44537	No Significant Difference
Unigene37346	ERF	0.08	0.15	0.15	0	0.5	0.29	#N/A	#N/A	No Significant Difference
Unigene35609	MYB	4.09	2.52	2.95	9.85	4.82	10.63	-1.59154	0.00204441	Down
Unigene38453	ERF	3.51	1.14	2.31	0.89	0.97	1.51	1.02056	0.193195	No Significant Difference
Unigene38492	ERF	6.47	15.06	5.64	0.86	0.23	0.38	4.39832	3.94283e-10	Up
Unigene17730	M-type_MADS	2.03	2.06	1.42	3.17	3.87	3.59	-1.24095	0.00442455	Down
Unigene6593	Nin-like	0	0.05	0	1.42	2.87	0.95	-6.82985	1.07279e-07	Down
Unigene39427	ERF	1.06	0.39	0.31	1.13	0.76	1.83	#N/A	#N/A	No Significant Difference
Unigene39749	ERF	0.25	0.16	0	0	0	0	#N/A	#N/A	No Significant Difference
Unigene39860	ERF	3.72	2.21	3.03	1.61	1.77	1.47	0.829508	0.148578	No Significant Difference
Unigene40219	ERF	2.3	0.51	0.85	0.29	0.79	0	#N/A	#N/A	No Significant Difference
Unigene40300	ERF	0.25	0.32	0.08	0.15	0	0.16	#N/A	#N/A	No Significant Difference
Unigene40585	ERF	0.42	0.64	1.13	0.16	0.16	0.39	#N/A	#N/A	No Significant Difference
Unigene13735	Trihelix	0.64	0.87	0.83	1.81	1.95	2.33	-1.19814	0.00974736	Down
Unigene41968	ERF	20.98	8.64	10.16	16.2	10.76	13.73	-0.0771954	0.911087	No Significant Difference
Unigene43107	ERF	3.01	2.41	2.3	6.26	2.97	1.92	-0.587511	0.486008	No Significant Difference
Unigene11827	WRKY	0.64	0.56	0.7	3.51	4.57	4.22	-2.63834	5.68773e-10	Down
Unigene41873	M-type_MADS	34.36	22.94	22.71	62.22	50.51	37.38	-1.38315	0.000648858	Down
Unigene44676	ERF	3.61	1.21	1.4	2.93	1.8	2.69	-0.226638	0.811234	No Significant Difference
Unigene46860	ERF	0.39	0.19	0.19	0.27	0.54	0	#N/A	#N/A	No Significant Difference
Unigene47342	ERF	0.59	0.66	1.04	0.09	0.09	0	#N/A	#N/A	No Significant Difference
Unigene47767	ERF	0.4	0.47	0.1	0.09	0.28	0.09	#N/A	#N/A	No Significant Difference
Unigene40152	ZF-HD	0.89	1.51	1.19	4.76	8.54	11.62	-3.38352	2.69164e-06	Down
Unigene50576	ERF	102.24	71.2	84.44	56.44	98.73	63.72	0.194919	0.646114	No Significant Difference
Unigene52056	ERF	2.09	1.14	1.05	3.35	1.22	0.82	-0.415613	0.710019	No Significant Difference
Unigene53002	ERF	1.57	0.32	0.54	1.03	1.56	1.47	#N/A	#N/A	No Significant Difference
Unigene55999	ERF	0.12	0.11	0.46	1.98	0.55	1.12	#N/A	#N/A	No Significant Difference
Unigene6122	ERF	0.05	0.22	0.14	0.5	0.67	0.72	-2.32605	0.00185409	Down
Unigene6220	ERF	40.46	73.54	75.27	51.76	80.23	71.25	-0.27354	0.445184	No Significant Difference
Unigene62773	ERF	0.14	0	0	0.13	0	0.13	#N/A	#N/A	No Significant Difference
Unigene62850	ERF	9.25	3.54	7.26	2.44	3.23	6.29	0.744962	0.312048	No Significant Difference
Unigene67098	ERF	173.21	266.62	243.07	159.4	170.04	156.71	0.417047	0.112169	No Significant Difference
Unigene71537	ERF	13.93	4.67	7.67	2.97	3.56	8.43	0.79229	0.31638	No Significant Difference
Unigene10920	AP2	2.03	2.29	2.88	0	0	0.06	7.05886	3.20594e-07	Up
Unigene73188	ERF	0.33	0.16	0.16	0.15	0	0	#N/A	#N/A	No Significant Difference
Unigene88014	ERF	0	0	0.2	0	0	0.2	#N/A	#N/A	No Significant Difference
Unigene96584	ERF	0	0	0	0.9	0.9	0.92	#N/A	#N/A	No Significant Difference
Unigene24790	M-type_MADS	71.06	28.4	43.33	11.16	14.2	11.96	2.06623	5.57172e-07	Up
Unigene118776	FAR1	0	0	0.33	1.29	0.32	0.33	#N/A	#N/A	No Significant Difference
Unigene13923	FAR1	15.7	14.62	9.93	17.5	10.2	9.8	0.439082	0.45655	No Significant Difference
Unigene149845	FAR1	0	0	0	0	0.52	0.54	#N/A	#N/A	No Significant Difference
Unigene22752	MIKC_MADS	3.45	8.47	3.69	24.1	7.5	7.69	-1.42381	0.044318	Down
Unigene19224	FAR1	0.92	3.21	2.69	5.61	5.84	6.14	-1.46993	0.00324589	Down
Unigene30611	B3	4.43	4.25	4.23	1.06	0.75	0.73	2.25351	1.1369e-06	Up
Unigene27102	FAR1	0	0	0	0.79	0.48	1.07	#N/A	#N/A	No Significant Difference
Unigene2830	FAR1	5.78	6.74	8.86	3.77	6.68	7.21	0.23879	0.667485	No Significant Difference
Unigene3029	FAR1	4.18	9.75	8.97	7.36	7.32	8.23	-0.225591	0.548561	No Significant Difference
Unigene3163	FAR1	9.05	4.07	5.91	14.22	6.13	9.07	0.0748563	0.907759	No Significant Difference
Unigene32025	FAR1	0.63	0.87	0.2	1.82	2.2	1.22	#N/A	#N/A	No Significant Difference
Unigene36288	FAR1	0.07	0.5	0.51	0.07	0	0.07	#N/A	#N/A	No Significant Difference
Unigene4313	FAR1	4.33	4.67	5.5	3.11	4.26	3.51	0.379937	0.148691	No Significant Difference
Unigene4370	FAR1	2.55	3.14	3.87	2.86	2.47	2.59	0.0775558	0.846622	No Significant Difference
Unigene44243	FAR1	0	2.41	1.44	0.51	0.85	0.52	#N/A	#N/A	No Significant Difference
Unigene37006	B3	34.97	24.49	21.71	0	0	0.07	9.94626	3.7647e-14	Up
Unigene4607	FAR1	0.54	3.48	1.2	1.19	1.87	1.26	-0.331436	0.715732	No Significant Difference
Unigene48381	FAR1	0.3	1.63	0.78	0.09	0.38	0.09	#N/A	#N/A	No Significant Difference
Unigene4948	FAR1	0	0.11	0.03	5.94	3.37	2.67	-6.8331	1.19829e-14	Down
Unigene5520	FAR1	1.52	2.16	3.06	1.22	1.22	1.8	0.544366	0.225095	No Significant Difference
Unigene5842	FAR1	1.05	4.15	1.93	2.04	2.52	2.69	-0.108409	0.882069	No Significant Difference
Unigene6046	FAR1	2.05	11.56	10.63	6.11	7.75	8.79	0.178952	0.825667	No Significant Difference
Unigene29289	MIKC_MADS	3.38	3.36	3.3	7.48	11.5	7.87	-1.51713	7.07846e-06	Down
Unigene6934	FAR1	0.43	1.23	1.48	0.51	1.16	0.69	-0.506934	0.455711	No Significant Difference
Unigene26419	LBD	3.71	2.78	2.49	14.89	15.41	13.51	-2.37345	1.11002e-09	Down
Unigene83059	FAR1	0.4	0.37	0.37	0.54	0.36	0.55	#N/A	#N/A	No Significant Difference
Unigene86626	FAR1	0	0	0.2	0	0	0	#N/A	#N/A	No Significant Difference
Unigene45467	LBD	1.14	1.53	1.19	7.36	3.16	2.67	-1.87681	0.00691118	Down
Unigene103458	G2-like	0	2.17	0.45	1.51	2.24	0.51	#N/A	#N/A	No Significant Difference
Unigene106782	G2-like	0.3	0	0	0.27	0.53	0	#N/A	#N/A	No Significant Difference
Unigene11075	G2-like	2.92	2.01	2.13	2.55	2.19	2.2	-0.35671	0.361884	No Significant Difference
Unigene67525	LBD	3.75	3.23	4.27	1.1	1.79	1.12	1.42935	0.0268682	Up
Unigene126714	G2-like	0.85	0.72	0	0	0	0	#N/A	#N/A	No Significant Difference
Unigene13074	G2-like	4.1	4.12	4.35	1.05	1.56	2.92	1.0322	0.0516845	No Significant Difference
Unigene26927	HSF	69.42	62.96	69.32	24.55	33.58	28.78	1.1009	1.9403e-06	Up
Unigene16938	G2-like	15.31	12.13	15.11	17.4	14.7	13.79	-0.329649	0.24776	No Significant Difference
Unigene17002	G2-like	0.27	0.4	0.25	0.04	0.12	0.55	#N/A	#N/A	No Significant Difference
Unigene18031	G2-like	38.95	35.43	27.59	14.77	16.99	15.29	0.0806904	0.83534	No Significant Difference
Unigene18321	G2-like	14.81	13.22	16.56	5.13	8.24	10.96	0.884479	0.0100501	No Significant Difference
Unigene19440	G2-like	1.12	1.17	0.42	2.83	1.4	1.61	-1.13807	0.102335	No Significant Difference
Unigene22920	G2-like	0.62	0.19	0.2	1.46	0.65	1.02	-2.0441	0.0227624	Down
Unigene24879	G2-like	6.56	5.34	6.43	6.51	7.05	3.99	-0.0202561	0.969323	No Significant Difference
Unigene25339	G2-like	1.81	1.95	1.34	3.57	2.89	1.81	-0.769276	0.179317	No Significant Difference
Unigene2780	G2-like	20.07	15.98	17	22.29	21.21	22.52	-0.502532	0.12995	No Significant Difference
Unigene3019	G2-like	62.35	24.44	27.67	21.84	20.08	18.06	0.798295	4.16768e-05	No Significant Difference
Unigene31592	G2-like	0.44	0.28	0.78	0	0.07	0.07	#N/A	#N/A	No Significant Difference
Unigene35430	G2-like	7.61	6.1	6.16	3.75	3.87	3.6	0.775689	0.0395871	No Significant Difference
Unigene3574	G2-like	61.39	45.07	50.86	39	44.48	46.36	0.162119	0.564093	No Significant Difference
Unigene36318	G2-like	12.35	23.64	22.91	24.07	26.53	21.51	-0.372491	0.33735	No Significant Difference
Unigene3718	G2-like	11.49	14.45	11.84	9.83	10.14	13.69	-0.086064	0.80914	No Significant Difference
Unigene40941	G2-like	0.51	0.16	0.08	0.39	0.39	0.48	#N/A	#N/A	No Significant Difference
Unigene4343	G2-like	0.35	0.53	0.43	0.09	0.02	0.06	2.75398	0.00338021	Up
Unigene43630	G2-like	4.16	9.13	10.55	5.87	7.65	8.07	0.0627221	0.914913	No Significant Difference
Unigene6981	G2-like	25.68	38.76	37.25	26.41	33.85	31.77	0.122573	0.706689	No Significant Difference
Unigene78607	G2-like	0	0	0	0.67	0.17	1.19	#N/A	#N/A	No Significant Difference
Unigene8081	G2-like	18.79	15.1	14.3	6.64	15.24	8.56	0.550149	0.185139	No Significant Difference
Unigene8344	G2-like	7.86	8.36	6.04	1.52	1.89	0.92	1.97036	1.23644e-06	Up
Unigene87465	G2-like	0	0	0	0	0	0	#N/A	#N/A	No Significant Difference
Unigene90584	G2-like	4.1	8.95	11.45	3.35	5.41	4.74	0.599668	0.396657	No Significant Difference
Unigene26395	HD-ZIP	12.39	3.56	7.03	10.48	15.92	19.38	-1.49247	0.00310045	Down
Unigene9188	G2-like	20.87	31.91	22.04	14.57	31.69	24.6	-0.173321	0.70037	No Significant Difference
Unigene9585	G2-like	0.17	0.08	0.08	0.16	0.16	0.05	#N/A	#N/A	No Significant Difference
Unigene101184	GATA	0	0.49	0	0	0	0	#N/A	#N/A	No Significant Difference
Unigene10951	GATA	6.56	9.93	8.79	8.82	7.76	5.34	0.0200775	0.96638	No Significant Difference
Unigene12858	GATA	25.09	17.7	19.54	8.81	14.18	15.4	0.812535	0.0201151	No Significant Difference
Unigene135160	GATA	0	0	0	0	0.83	0	#N/A	#N/A	No Significant Difference
Unigene16439	GATA	8.42	12.73	11.17	7.09	8.96	8.3	0.353218	0.246924	No Significant Difference
Unigene166483	GATA	0.83	0	0	0	0	0	#N/A	#N/A	No Significant Difference
Unigene18551	GATA	0.33	0.12	0.19	0.08	0.18	0	#N/A	#N/A	No Significant Difference
Unigene19652	GATA	0.15	0.08	0.05	4.53	0.96	0.41	-4.5657	0.000217846	Down
Unigene21842	GATA	0	0	0	0	0.13	0	#N/A	#N/A	No Significant Difference
Unigene22960	GATA	0	0.28	0.1	9	1.19	0.55	-5.00177	0.00019272	Down
Unigene23796	GATA	4.25	2.03	3.18	3.34	3.77	3.27	-0.179781	0.770876	No Significant Difference
Unigene24194	GATA	55.56	38.12	51.5	18.73	26.22	31.71	0.868953	0.00828048	No Significant Difference
Unigene24784	GATA	15.92	5.34	7.39	4.5	5.44	3.26	0.932312	0.167065	No Significant Difference
Unigene25505	GATA	9.05	7.06	7.41	11.52	12.3	16.3	-0.546245	0.111645	No Significant Difference
Unigene26822	GATA	0.67	2.76	1.09	4.08	1.79	0.79	-0.688281	0.506901	No Significant Difference
Unigene27918	GATA	11.81	14.35	18.17	3.16	6.22	4.76	0.896253	0.0876417	No Significant Difference
Unigene2837	GATA	16.05	14.92	17.24	10.31	13.03	15.36	0.273389	0.340651	No Significant Difference
Unigene29938	GATA	107.06	181.47	135.43	95.72	83.39	80.71	-0.027244	0.940567	No Significant Difference
Unigene30219	GATA	3.45	1.8	2.73	4.98	3.13	2.83	-0.246359	0.711273	No Significant Difference
Unigene88170	HD-ZIP	3.47	1.99	1.83	1.97	12.36	12.61	-1.89815	0.0315141	Down
Unigene55888	GATA	2.32	2.04	1.73	2.31	2.31	2.2	-0.453249	0.533245	No Significant Difference
Unigene2906	HD-ZIP	6.38	4.66	8.53	2.06	3.65	4.08	1.34938	0.000229126	Up
Unigene6339	GATA	17.65	16.2	16.83	17.44	18.35	21.8	-0.230952	0.377098	No Significant Difference
Unigene65154	GATA	0	0	0	0	0	0	#N/A	#N/A	No Significant Difference
Unigene7458	GATA	38.84	36.21	34.98	46.25	41.28	45.64	-0.354414	0.172082	No Significant Difference
Unigene8564	GATA	5.27	3.92	3.9	4.15	2.84	2.7	0.314999	0.527406	No Significant Difference
Unigene92338	GATA	0	0	0	0	0	0	#N/A	#N/A	No Significant Difference
Unigene98246	GATA	0	0	0.24	0	0	0.24	#N/A	#N/A	No Significant Difference
Unigene14255	GeBP	55.75	38.7	43.33	35.82	36.06	32.99	0.156661	0.649251	No Significant Difference
Unigene14579	GeBP	56.58	63.52	66.43	53.73	52.6	60.64	0.140061	0.530187	No Significant Difference
Unigene16411	GeBP	31.64	23.69	25.79	14.58	23.37	24.83	0.333488	0.412289	No Significant Difference
Unigene17066	GeBP	59.82	44.46	52.7	26.99	40.99	38.52	0.617159	0.0497915	No Significant Difference
Unigene24094	GeBP	13.14	12.57	14.71	8.79	10.56	8.95	0.452482	0.0801423	No Significant Difference
Unigene27413	GeBP	7.61	4.96	6.22	4.82	7.74	6.58	-0.0884232	0.859368	No Significant Difference
Unigene31516	HD-ZIP	3.7	2.05	2.64	6.88	5.15	5.01	-1.08302	0.0246572	Down
Unigene10336	GRAS	1.34	0.75	0.96	0.81	0.34	1.13	0.372803	0.653877	No Significant Difference
Unigene10359	GRAS	9.1	7.22	8.05	6.2	6.19	5.8	0.363071	0.253474	No Significant Difference
Unigene7497	HD-ZIP	121.65	107.4	136.9	46.78	73.55	52.86	1.0689	7.76134e-05	Up
Unigene10418	GRAS	0.15	0.14	0.17	0.06	0.08	0	#N/A	#N/A	No Significant Difference
Unigene46840	HB-other	8.5	6.16	6.9	2.56	3.08	2.56	1.3408	0.00144503	Up
Unigene106365	GRAS	0.3	0.53	0.54	0	0.26	0	#N/A	#N/A	No Significant Difference
Unigene10741	GRAS	21.85	13.43	15.46	21.12	16.22	14.1	-0.123766	0.802147	No Significant Difference
Unigene11003	GRAS	44.39	22.62	26.68	22.37	19.23	17.35	0.0947046	0.735882	No Significant Difference
Unigene11046	GRAS	2.4	2.37	2.5	4.44	2.23	1.56	-0.274261	0.687179	No Significant Difference
Unigene11503	GRAS	1.53	1.43	1.94	1.91	1.9	0.75	0.772038	0.183384	No Significant Difference
Unigene121059	GRAS	0	0.33	0	0.34	0.99	0.34	#N/A	#N/A	No Significant Difference
Unigene12634	GRAS	90.31	127.42	107.4	44.64	45.59	56.52	0.429697	0.0515177	No Significant Difference
Unigene6913	HB-other	11.17	7.01	7.55	23.69	11.84	8.42	-1.13664	0.0246075	Down
Unigene135727	GRAS	0.49	0.41	0	0.85	0	0	#N/A	#N/A	No Significant Difference
Unigene13640	GRAS	0.38	0.3	0.54	0.38	0.48	0.39	#N/A	#N/A	No Significant Difference
Unigene10363	GRAS	7.11	5.95	5.94	18.96	14.88	15.49	-1.95469	4.00868e-11	Down
Unigene14677	GRAS	12.34	5.36	7.12	4.69	4.61	4.25	0.515055	0.307253	No Significant Difference
Unigene15714	GRAS	1.98	3.71	2.72	2.26	1.54	0.82	0.73842	0.242942	No Significant Difference
Unigene15750	GRAS	2.21	2.32	3.03	3.74	2.67	3.01	-0.400715	0.350626	No Significant Difference
Unigene17061	GRAS	61.23	41.46	48.75	68.91	68.26	57.59	-0.416505	0.23069	No Significant Difference
Unigene17440	GRAS	1.11	0.69	0.58	0.11	1.65	1.24	-0.813668	0.470869	No Significant Difference
Unigene175290	GRAS	0	0.76	0.8	0	0	0	#N/A	#N/A	No Significant Difference
Unigene1784	GRAS	21.04	18.89	23.76	14.73	18.55	16.88	0.226956	0.32239	No Significant Difference
Unigene182606	GRAS	0	0	0	0	0	0	#N/A	#N/A	No Significant Difference
Unigene184057	GRAS	1.14	0	0	0	0	0	#N/A	#N/A	No Significant Difference
Unigene20477	GRAS	0.04	0.04	0.09	0.67	0.55	0.38	#N/A	#N/A	No Significant Difference
Unigene21905	GRAS	19.13	9.64	11.56	13.93	11.41	8.9	0.190206	0.739849	No Significant Difference
Unigene10568	GRAS	9.35	7.95	10.88	1.45	2.73	1.08	2.47517	3.69874e-09	Up
Unigene2542	GRAS	31.91	68.66	63.51	46.77	59.13	68.36	-0.186488	0.466747	No Significant Difference
Unigene2556	GRAS	10.89	22.89	23.2	13.45	17.72	20.39	-0.0395642	0.912398	No Significant Difference
Unigene3611	GRAS	1.23	1.17	1.86	0.88	1.11	1.7	-0.177995	0.762072	No Significant Difference
Unigene37022	GRAS	0.23	0.51	0.44	0.92	0.57	0.5	#N/A	#N/A	No Significant Difference
Unigene3827	GRAS	11.04	18.98	18.32	6.11	8.53	9.59	0.702456	0.00227006	No Significant Difference
Unigene39248	GRAS	0.08	0.15	0.31	0.6	0.45	0.23	#N/A	#N/A	No Significant Difference
Unigene12967	GRAS	25.3	20.5	24.25	8.5	12.29	10.78	1.10126	2.4978e-05	Up
Unigene41499	GRAS	0.41	0.6	0.25	0.32	0.29	0	#N/A	#N/A	No Significant Difference
Unigene4215	GRAS	29.31	33.45	34.61	26.41	28.8	30.65	0.0945254	0.652502	No Significant Difference
Unigene43391	GRAS	11.96	16.78	16.46	7.66	11.12	12.83	0.454992	0.195167	No Significant Difference
Unigene14597	GRAS	14.19	15.63	17.68	6.98	8.77	6.21	1.0461	3.09891e-05	Up
Unigene48946	GRAS	0.43	0.87	0.36	0	1.3	0.58	#N/A	#N/A	No Significant Difference
Unigene4904	GRAS	8.86	10.1	10.86	7.72	5.72	5.92	0.541972	0.0753666	No Significant Difference
Unigene5272	GRAS	5.85	9.47	8.31	7.37	5.85	5.31	0.430138	0.325528	No Significant Difference
Unigene5339	GRAS	4.91	6.3	6.59	5.57	6.74	6.14	-0.166374	0.522791	No Significant Difference
Unigene57842	GRAS	33.08	12.84	14.68	15.41	16.46	14.82	0.345045	0.580604	No Significant Difference
Unigene6402	GRAS	113.69	154.74	149.08	56.22	81.87	88.46	0.904734	1.04179e-05	No Significant Difference
Unigene64524	GRAS	0.85	0.53	0.4	0	0	0	#N/A	#N/A	No Significant Difference
Unigene66442	GRAS	0.29	0.14	0.42	0.13	0.27	0	#N/A	#N/A	No Significant Difference
Unigene66965	GRAS	0.59	0.28	0	0.14	0.14	0	#N/A	#N/A	No Significant Difference
Unigene23703	GRAS	89.25	62.42	70.28	14	27.74	25.57	1.49757	1.61651e-05	Up
Unigene6856	GRAS	3.86	5.64	7.02	4.71	6.72	8.38	-0.331818	0.4066	No Significant Difference
Unigene7669	GRAS	19.27	19.5	20.54	22.55	22.13	21.38	-0.257387	0.234279	No Significant Difference
Unigene7909	GRAS	5.45	6.02	7.02	3.39	4.89	4.51	0.468441	0.0914103	No Significant Difference
Unigene8014	GRAS	2.92	2.42	3.53	1.98	2.16	1.98	0.365526	0.335908	No Significant Difference
Unigene8587	GRAS	13.26	14.68	14.97	9.18	9.77	10.02	0.500787	0.011458	No Significant Difference
Unigene9207	GRAS	41.61	23.3	34.25	13.36	15.36	13.18	0.0229946	0.953029	No Significant Difference
Unigene9313	GRAS	0.99	1.05	1.27	2.38	1.37	1.11	-0.636084	0.276669	No Significant Difference
Unigene14646	GRF	0.43	0.59	0.52	0.37	0.54	0.34	#N/A	#N/A	No Significant Difference
Unigene16453	GRF	0.27	0.22	0.61	0.18	0.23	0.12	#N/A	#N/A	No Significant Difference
Unigene17858	GRF	14.48	9.15	10.38	9.14	10.75	7.36	-0.194501	0.632177	No Significant Difference
Unigene35454	GRF	0.8	0.46	1.34	0.31	1.61	0.62	#N/A	#N/A	No Significant Difference
Unigene68454	GRF	0.31	1.71	1.16	1.4	1.12	0.57	#N/A	#N/A	No Significant Difference
Unigene8706	GRF	4.69	3.64	4.61	2.12	2.87	2.65	0.739367	0.0295419	No Significant Difference
Unigene108918	HB-other	0.62	0.27	3.54	0	0.27	0.28	#N/A	#N/A	No Significant Difference
Unigene122530	HB-other	0.39	0	0	0	0	0	#N/A	#N/A	No Significant Difference
Unigene13438	HB-other	8.36	10.1	10.03	7.35	8.18	6.97	0.200489	0.459116	No Significant Difference
Unigene139687	HB-other	0	5.77	2.28	0	0.69	0	#N/A	#N/A	No Significant Difference
Unigene144109	HB-other	0	0	0	0	0	0	#N/A	#N/A	No Significant Difference
Unigene15613	HB-other	0	0	0.04	0.03	0.24	0	#N/A	#N/A	No Significant Difference
Unigene16084	HB-other	16.86	15.71	16.4	11.96	12.12	10.09	0.36975	0.25827	No Significant Difference
Unigene1701	HB-other	12.2	13.99	16.96	9.35	10.25	9.16	0.451374	0.0501436	No Significant Difference
Unigene226	HB-other	32.61	16.74	20.93	15.29	15.53	13.95	0.417261	0.118837	No Significant Difference
Unigene240	HB-other	31.65	23.56	27.99	18.23	23.51	20.92	0.0506734	0.904197	No Significant Difference
Unigene30656	HB-other	0	0.12	0.12	0.16	0.16	0.33	#N/A	#N/A	No Significant Difference
Unigene32982	HB-other	10.75	2.69	4.81	4.15	3.25	2.29	-0.000905067	0.999155	No Significant Difference
Unigene3720	HB-other	16.84	17.34	21.77	12.83	15.45	17.32	0.226341	0.425962	No Significant Difference
Unigene38927	HB-other	0	3.72	2.48	0.23	0.85	2.8	0.72725	0.683467	No Significant Difference
Unigene39442	HB-other	1.79	6.49	7.64	2.53	4.33	6.64	0.129841	0.888081	No Significant Difference
Unigene41824	HB-other	0.3	0.94	0.95	0.4	0.24	0.49	#N/A	#N/A	No Significant Difference
Unigene43785	HB-other	12.01	11.22	15.1	7.27	9.59	6.67	0.481446	0.222884	No Significant Difference
Unigene41008	GRAS	38.89	113.03	110.29	9.45	18.11	29.26	1.83927	0.000574562	Up
Unigene48903	HB-other	0	0	0	0	0	0	#N/A	#N/A	No Significant Difference
Unigene4737	GRAS	16.95	15.05	16.37	4.91	7.55	9.31	1.10016	0.000405367	Up
Unigene51501	HB-other	0	0	0	0.1	0	0	#N/A	#N/A	No Significant Difference
Unigene6796	GRAS	21.88	24.41	26.78	7.04	12.12	12.63	1.14768	4.73564e-05	Up
Unigene73743	HB-other	0.19	7.57	5.8	1.06	1.8	2.88	1.17511	0.381633	No Significant Difference
Unigene85968	HB-other	1.28	2.3	3.98	3.77	4.47	3.31	-0.716976	0.369687	No Significant Difference
Unigene3091	HB-PHD	4.21	7.17	8.03	6.64	8.44	7.99	-0.330138	0.344816	No Significant Difference
Unigene12854	HD-ZIP	74.99	34.29	49.47	70.63	132.13	89.27	-0.942902	0.0319151	No Significant Difference
Unigene13400	HD-ZIP	118.82	87.93	105.5	38.9	67.51	81.99	0.687072	0.0715749	No Significant Difference
Unigene14480	HD-ZIP	3.84	1.03	2.5	1.76	1.97	1.38	0.376761	0.601524	No Significant Difference
Unigene14557	HD-ZIP	55.25	33.88	40.97	31.95	35.56	30.21	0.532281	0.149024	No Significant Difference
Unigene16705	HD-ZIP	1.23	2.12	2.4	2.25	1.98	1.85	-0.179227	0.742467	No Significant Difference
Unigene191820	HD-ZIP	1.34	0	1.07	0	0	0	#N/A	#N/A	No Significant Difference
Unigene21198	HD-ZIP	174.94	109.18	115.68	60.95	125.28	102.73	0.408222	0.370168	No Significant Difference
Unigene25704	HD-ZIP	223.04	216.28	210.74	120.9	140.04	156.65	0.377989	0.112854	No Significant Difference
Unigene18402	bZIP	7.15	1.82	3.68	0.62	1.31	1.72	1.89566	0.0150965	Up
Unigene32237	GATA	12.86	7.52	6.86	32.98	16.76	11.69	-1.27562	0.0299781	Down
Unigene2991	HD-ZIP	48.41	31.68	36.42	46.72	40.27	39.88	-0.0569685	0.809058	No Significant Difference
Unigene30711	HD-ZIP	236.67	184.8	183.87	281.16	275.69	258.64	-0.314511	0.299047	No Significant Difference
Unigene57458	GATA	5.38	4.01	3.98	16.07	7.03	5.16	-1.49278	0.0230647	Down
Unigene3351	HD-ZIP	65.66	43.6	73.37	16.03	42.13	43.29	0.736813	0.0948143	No Significant Difference
Unigene3449	HD-ZIP	35.07	22.62	22.84	21.19	24.03	20.92	0.35588	0.0817383	No Significant Difference
Unigene36094	HD-ZIP	0.59	0.28	0.43	0.83	0.48	0.21	#N/A	#N/A	No Significant Difference
Unigene3673	HD-ZIP	2.28	2.84	2.87	1.43	1.49	2.92	0.313849	0.578379	No Significant Difference
Unigene3764	HD-ZIP	36.69	32.24	34.2	23.36	34.73	37.56	0.357932	0.218647	No Significant Difference
Unigene4070	HD-ZIP	4.32	5.96	7.9	3.35	5.52	5.72	0.203491	0.614748	No Significant Difference
Unigene4120	HD-ZIP	197.22	163.08	193.72	170.83	157.04	132.45	0.203099	0.526674	No Significant Difference
Unigene44968	HD-ZIP	43.65	21.01	29.95	16.01	15.64	14.24	0.500034	0.313707	No Significant Difference
Unigene4548	HD-ZIP	1.01	2.63	2.56	0.9	2.14	1.46	0.383654	0.543508	No Significant Difference
Unigene4744	HD-ZIP	50.01	48.15	51.33	37.67	43.56	43.17	0.185687	0.411033	No Significant Difference
Unigene47568	HD-ZIP	61.93	31.19	31.86	61.96	41.89	34.62	-0.20235	0.743624	No Significant Difference
Unigene7368	HD-ZIP	65	70.22	62.41	53.25	63.34	65.58	0.0975135	0.693612	No Significant Difference
Unigene7465	HD-ZIP	114.06	100.48	102.04	57.36	69.95	72.6	0.632418	0.000699643	No Significant Difference
Unigene11639	G2-like	17.91	32.62	32.23	9.02	8.22	6.47	1.10342	0.00216312	Up
Unigene13269	G2-like	13.24	13.17	12.17	1.99	3.77	3.97	1.75016	5.9038e-05	Up
Unigene9276	HD-ZIP	1.58	1.62	2.35	1.6	3.65	3.47	-0.72148	0.145816	No Significant Difference
Unigene11810	HRT-like	5.59	10.09	7.67	8.82	4.43	4.55	-0.485692	0.399613	No Significant Difference
Unigene106290	HSF	0	0	0	2.38	1.31	0.54	#N/A	#N/A	No Significant Difference
Unigene111072	HSF	0	0.57	0.29	0	0	0	#N/A	#N/A	No Significant Difference
Unigene11287	HSF	56.93	40.49	53.69	35.03	52.95	60.81	-0.0454981	0.91565	No Significant Difference
Unigene12387	HSF	9.49	12.86	14.41	9.33	11.29	14.09	0.0135306	0.97079	No Significant Difference
Unigene129253	HSF	5.23	2.25	8.54	3.45	9.81	5.07	-0.255695	0.814814	No Significant Difference
Unigene13180	HSF	2.97	2.57	2.56	0.55	0.35	0.42	2.43154	5.00593e-07	Up
Unigene13967	HSF	1.34	0.93	1.34	1.38	1.3	1.18	-0.372752	0.528214	No Significant Difference
Unigene152355	HSF	0	0	0	0	0	0	#N/A	#N/A	No Significant Difference
Unigene15236	HSF	12.52	7.44	9.75	11.9	10.77	11.53	-0.549634	0.0965991	No Significant Difference
Unigene20002	HSF	7.05	2.39	6.09	5.89	5.58	10.11	-0.415045	0.514632	No Significant Difference
Unigene23939	HSF	0.76	0.64	0.64	0.28	0.19	0.53	#N/A	#N/A	No Significant Difference
Unigene9145	G2-like	12.36	25.72	25.91	11.39	16.97	12.37	2.09875	3.65737e-09	Up
Unigene28966	HSF	0.78	0.35	0.76	0.56	2.43	0.34	#N/A	#N/A	No Significant Difference
Unigene34961	HSF	0.29	0	0.42	0.8	0.2	0.2	#N/A	#N/A	No Significant Difference
Unigene35097	HSF	0.14	0.41	0.14	0.2	0.2	0.61	#N/A	#N/A	No Significant Difference
Unigene38679	HSF	6.86	2.48	4.72	4.83	7.01	5.96	-0.514731	0.394171	No Significant Difference
Unigene42710	HSF	2.35	4.11	3.77	12.89	8.42	9.18	-1.103	0.0652117	No Significant Difference
Unigene4928	HSF	2.1	2.54	2.28	4.76	3.42	3.4	-0.545117	0.0981061	No Significant Difference
Unigene53076	HSF	0	0.21	0.47	0.71	0	0.34	#N/A	#N/A	No Significant Difference
Unigene8205	HSF	13.34	8.18	15.13	12.9	13.38	15.52	-0.257778	0.472911	No Significant Difference
Unigene88608	HSF	0.98	6.84	9	4.61	8.79	10.82	-0.575876	0.570883	No Significant Difference
Unigene88902	HSF	9.53	7.23	8.2	5.78	6.15	4.94	0.505451	0.336726	No Significant Difference
Unigene27544	C2H2	1.55	1.15	0.86	0.06	0	0	5.80329	0.000173978	Up
Unigene97672	HSF	1.79	9.92	11.09	7.71	5.26	8.65	-0.0198821	0.984477	No Significant Difference
Unigene11634	LBD	0.72	1.73	0.81	12.08	3.59	1.42	-2.5874	0.00240876	Down
Unigene1621	FAR1	2.81	4.53	2.72	4.89	10.46	7.27	-2.40317	1.01945e-10	Down
Unigene18661	LBD	0.88	2.84	3.71	0.63	1.01	0.22	1.60803	0.0983688	No Significant Difference
Unigene20256	LBD	0.58	1.33	1.25	1.55	1.58	1.65	-0.710421	0.21026	No Significant Difference
Unigene21008	LBD	0	0.15	0.1	17.44	1.51	0.14	-6.47375	0.00275185	Down
Unigene23097	LBD	22.48	14.04	17.08	10.07	14.25	10.44	0.988942	0.0283372	No Significant Difference
Unigene23362	LBD	0.05	0.05	0	2.78	0.47	0.05	#N/A	#N/A	No Significant Difference
Unigene23574	LBD	12.24	13.78	9.24	7.44	12.39	8.22	0.304039	0.478802	No Significant Difference
Unigene25322	LBD	24.67	19.79	23.58	30.81	31.32	34.24	-0.165061	0.690901	No Significant Difference
Unigene6243	C3H	3.8	3.26	2.61	0.02	0.02	0.02	7.07113	5.82129e-13	Up
Unigene26693	LBD	0.17	0.16	0.05	0.05	0.53	0.05	#N/A	#N/A	No Significant Difference
Unigene30194	LBD	4.86	3.98	6.25	1.08	1.55	0.07	2.42922	0.00585975	Up
Unigene30499	LBD	2.7	0.72	0.98	0.94	1.65	3.5	-0.459111	0.657354	No Significant Difference
Unigene32330	LBD	1.13	1.4	1.67	1.48	0.75	0.69	0.431466	0.594325	No Significant Difference
Unigene34236	LBD	3.36	2.58	2	2	1.26	2.44	0.385208	0.575152	No Significant Difference
Unigene34324	LBD	1.01	1.57	1.88	0.73	4.98	5.6	-1.49121	0.0871675	No Significant Difference
Unigene34979	LBD	8.33	7.98	12.37	2.34	4.36	0.68	1.89093	0.00546532	Up
Unigene36231	LBD	0.45	1	0.94	1.87	3.2	4.35	-2.04217	0.00109372	Down
Unigene36414	LBD	6.07	5.45	6.96	2.92	5.87	5.08	0.36467	0.432961	No Significant Difference
Unigene38319	LBD	1.35	0.86	1.47	0.6	0.58	0.48	#N/A	#N/A	No Significant Difference
Unigene38710	LBD	11.41	12.2	14.18	27.69	11	6.15	-0.361908	0.640609	No Significant Difference
Unigene39470	LBD	0.94	0.92	0.83	1.76	0.71	0.37	#N/A	#N/A	No Significant Difference
Unigene810	FAR1	6.86	7.56	6.01	31.79	37.06	38	-2.49539	1.74142e-22	Down
Unigene878	FAR1	13.1	19.58	17.65	6.25	9	9.29	1.29028	5.56347e-05	Up
Unigene48694	LBD	0.11	0	0.1	0	0	0.2	#N/A	#N/A	No Significant Difference
Unigene56329	LBD	0.36	0.79	0.92	0.44	0.33	0.56	#N/A	#N/A	No Significant Difference
Unigene58609	LBD	0.75	0.24	0.72	0.23	0.46	0.47	#N/A	#N/A	No Significant Difference
Unigene60434	LBD	0	0	0	0.12	0	0	#N/A	#N/A	No Significant Difference
Unigene63477	LBD	0.42	0.39	0.4	0.64	1.91	1.85	#N/A	#N/A	No Significant Difference
Unigene66271	LBD	0.88	0.68	0.97	10.73	7.65	5.17	-3.30255	3.60405e-07	Down
Unigene30982	ERF	8.58	10.31	7.77	33.74	14.9	13.03	-1.34479	0.0111275	Down
Unigene72780	LBD	3.97	2	2.19	0	0	0	#N/A	#N/A	No Significant Difference
Unigene39369	LFY	3.67	1.9	2.43	0	0	0	7.4552	5.57172e-07	Up
Unigene69033	LFY	1.39	1.15	2.78	0	0	0	#N/A	#N/A	No Significant Difference
Unigene18699	LSD	18.74	14.83	15.91	34.22	29.89	25.61	-0.751173	0.0175022	No Significant Difference
Unigene34733	LSD	0.86	0.27	0.28	0.27	0.27	0.2	#N/A	#N/A	No Significant Difference
Unigene56528	LSD	11.6	14.46	15.68	15.5	14.6	15.12	-0.235705	0.48916	No Significant Difference
Unigene7075	LSD	12.63	9.08	16.6	7.09	9.23	8.03	-0.524899	0.0484834	No Significant Difference
Unigene10205	MIKC_MADS	99.32	81.2	60.24	213.1	99.32	103.15	-0.857832	0.0941837	No Significant Difference
Unigene1436	MIKC_MADS	1.1	0.83	1.44	1.82	1.72	1.08	-0.387919	0.426118	No Significant Difference
Unigene16445	MIKC_MADS	118.18	101.43	111.92	212.88	176.45	163.29	-0.716028	0.0147979	No Significant Difference
Unigene17076	MIKC_MADS	395.27	311.83	294.96	602.83	370.91	378.98	-0.511078	0.220986	No Significant Difference
Unigene17178	MIKC_MADS	3.4	3.75	4.09	1.81	1.67	0.52	1.40325	0.016767	Up
Unigene18465	MIKC_MADS	1.35	1.85	1.57	0.58	0.87	0.74	1.11178	0.0538492	No Significant Difference
Unigene19397	MIKC_MADS	0	0	0	0.11	0.11	0	#N/A	#N/A	No Significant Difference
Unigene20447	MIKC_MADS	219.13	148.32	165.79	103.3	91.42	88.99	0.145458	0.694537	No Significant Difference
Unigene21335	MIKC_MADS	46.1	49.68	57.48	81.4	73.53	59.38	-0.562376	0.0457586	No Significant Difference
Unigene40910	ERF	3.22	1.31	2.87	13.09	14.25	14.61	-2.54549	1.83235e-09	Down
Unigene23675	MIKC_MADS	88.67	87.42	76.32	144.59	87.02	90.91	-0.425764	0.292001	No Significant Difference
Unigene2439	MIKC_MADS	126.07	90.84	96.94	178.88	123.65	133.67	-0.65297	0.0644785	No Significant Difference
Unigene26754	MIKC_MADS	1.73	0.81	1.25	0.99	1.57	1.27	-0.052742	0.947712	No Significant Difference
Unigene6724	CAMTA	3.11	2.11	1.99	0	0	0	8.62799	2.28773e-10	Up
Unigene27822	MIKC_MADS	0	0.06	0	0.05	0.16	0.33	#N/A	#N/A	No Significant Difference
Unigene47840	ERF	6.2	2.19	5.53	12.82	9.47	17.62	-1.55479	0.00512653	Down
Unigene29459	MIKC_MADS	10.71	7.87	12.06	11.21	19.59	14.93	-0.609084	0.0985898	No Significant Difference
Unigene31386	MIKC_MADS	343.59	477.7	478.57	399.01	450.92	505.71	-0.0845517	0.774663	No Significant Difference
Unigene32482	MIKC_MADS	0.47	0.77	0.19	2.17	2.37	1.7	-2.18607	0.0026092	Down
Unigene5202	MIKC_MADS	131.31	124.15	136.89	163.41	158.16	172.19	-0.409109	0.049488	No Significant Difference
Unigene60452	MIKC_MADS	0	0	0	0.84	0.6	0.12	#N/A	#N/A	No Significant Difference
Unigene9228	MIKC_MADS	183.5	100.47	115.99	138.46	128.21	134.43	-0.161658	0.68219	No Significant Difference
Unigene109673	M-type_MADS	0	0	0	0.28	0.7	0.36	#N/A	#N/A	No Significant Difference
Unigene11922	M-type_MADS	8.95	7.63	9.55	8.36	9.77	8.65	-0.166849	0.69442	No Significant Difference
Unigene14027	M-type_MADS	52.89	29.91	32.55	49.92	39.21	36.28	-0.385263	0.357228	No Significant Difference
Unigene163332	M-type_MADS	0	1.26	0.66	0	0	0	#N/A	#N/A	No Significant Difference
Unigene163732	M-type_MADS	0	0	0	1.35	0.65	0	#N/A	#N/A	No Significant Difference
Unigene85639	CAMTA	0	7.92	10.27	0.41	0.39	0.42	3.56148	0.0237007	Up
Unigene18454	M-type_MADS	2.39	2.02	1.56	0.2	0.2	0	4.00523	1.82688e-05	Up
Unigene18954	M-type_MADS	281.87	192.51	282.22	124.25	312.62	320.93	-0.0451323	0.936095	No Significant Difference
Unigene192850	M-type_MADS	0	2.05	3.25	0	1.07	1.13	#N/A	#N/A	No Significant Difference
Unigene193757	M-type_MADS	1.38	0	0	0	2.17	1.15	#N/A	#N/A	No Significant Difference
Unigene19536	M-type_MADS	0	0	0	0.04	0.12	0.04	#N/A	#N/A	No Significant Difference
Unigene195881	M-type_MADS	0	0	0	0	0	0	#N/A	#N/A	No Significant Difference
Unigene14504	ERF	2.25	6.1	7.03	4.8	9.2	10.71	-1.22967	0.0279599	Down
Unigene26134	M-type_MADS	22.29	19.94	19.91	8.89	14.73	11.23	0.778207	0.0105907	No Significant Difference
Unigene34591	M-type_MADS	0.5	0.34	0.21	0.66	1.06	0.94	#N/A	#N/A	No Significant Difference
Unigene39376	M-type_MADS	0.97	0.54	0.37	1.58	2.72	1.67	-2.65645	0.0010824	Down
Unigene41339	M-type_MADS	0.26	0.49	1.24	0.16	0.8	0.4	#N/A	#N/A	No Significant Difference
Unigene24333	ERF	321.68	253.61	309.4	92.45	161.06	166.7	1.42777	4.73144e-06	Up
Unigene46156	M-type_MADS	8.74	25.93	31.45	39.43	39.36	30.46	-0.831398	0.132727	No Significant Difference
Unigene47537	M-type_MADS	0.88	0.19	0.19	0.37	0.37	0.56	#N/A	#N/A	No Significant Difference
Unigene36369	ERF	1.14	1.61	1.57	5.14	2.3	3.73	-1.88537	0.001374	Down
Unigene48613	M-type_MADS	0.3	0	0	0.38	1.13	0.57	#N/A	#N/A	No Significant Difference
Unigene49571	M-type_MADS	1.04	0.49	0.7	0	0.1	0.1	#N/A	#N/A	No Significant Difference
Unigene51004	M-type_MADS	35.2	83.71	80.5	60.85	70.59	84.24	-0.115959	0.839228	No Significant Difference
Unigene57265	M-type_MADS	15.77	33.42	40.67	28.05	28.84	28.45	-0.0153574	0.97734	No Significant Difference
Unigene62892	M-type_MADS	5.58	4.76	5.48	7.39	8.79	6.55	-0.689534	0.168499	No Significant Difference
Unigene62920	M-type_MADS	0.55	0.26	0	0	0.38	1.15	#N/A	#N/A	No Significant Difference
Unigene64246	M-type_MADS	10.93	0.79	2.9	1.16	8.57	13.1	-1.14229	0.428277	No Significant Difference
Unigene66197	M-type_MADS	0	0	0	0	0	0.16	#N/A	#N/A	No Significant Difference
Unigene76054	M-type_MADS	58.61	30.96	30.91	60.46	48.07	50.23	-0.889804	0.0272429	No Significant Difference
Unigene7701	M-type_MADS	1.95	3.72	2.87	17.51	4.1	1.6	-1.29405	0.158125	No Significant Difference
Unigene90394	M-type_MADS	7.99	2.65	3.72	3.04	1.53	1.45	#N/A	#N/A	No Significant Difference
Unigene92207	M-type_MADS	25.4	15.13	22.1	27.24	42.19	35.17	-0.494974	0.238722	No Significant Difference
Unigene92645	M-type_MADS	8.41	7.8	9.06	8.07	10.19	7.8	0.0112283	0.986187	No Significant Difference
Unigene98841	M-type_MADS	0	0	0	0.47	0.47	0.24	#N/A	#N/A	No Significant Difference
Unigene10127	MYB	126.4	117.01	111.12	63.93	76.96	56.71	0.289875	0.333452	No Significant Difference
Unigene117403	MYB	0	0	0	0	0.62	0	#N/A	#N/A	No Significant Difference
Unigene126861	MYB	0	1.08	1.12	0.74	0	0.37	#N/A	#N/A	No Significant Difference
Unigene13811	MYB	3.23	6.27	5.7	4.14	6.02	5.78	-0.165147	0.68057	No Significant Difference
Unigene37544	ERF	65.57	41.57	44.03	15.56	26.07	31.24	1.02589	0.0121356	Up
Unigene142977	MYB	0	0	0	0	0.47	0	#N/A	#N/A	No Significant Difference
Unigene14541	MYB	0.25	0.73	0.44	3.08	2.65	2.67	-2.70296	1.65748e-06	Down
Unigene14730	MYB	10.87	11.16	12.84	12.78	11.59	11.37	-0.148092	0.610867	No Significant Difference
Unigene14947	MYB	23.33	21.12	24.44	19.76	19.32	17.46	0.237847	0.404968	No Significant Difference
Unigene15358	MYB	0.77	2.14	1.08	4.95	2.18	1.53	-1.27124	0.090499	No Significant Difference
Unigene15563	MYB	4.02	1.8	2.61	0.7	0.29	1.1	2.12604	0.0141496	Up
Unigene1629	MYB	13.85	21.45	21.24	21.93	26.7	24.42	-0.28707	0.247487	No Significant Difference
Unigene16946	MYB	23.91	19.77	26.31	23.18	21.23	18.47	-0.325285	0.325426	No Significant Difference
Unigene18662	MYB	0.43	0.52	0.31	1.17	0.55	0.66	#N/A	#N/A	No Significant Difference
Unigene18930	MYB	0.64	0.41	0.45	0.35	0.32	0.47	#N/A	#N/A	No Significant Difference
Unigene190123	MYB	0	0	0	0	0	0	#N/A	#N/A	No Significant Difference
Unigene19100	MYB	5.12	7.94	9.12	9.02	8.04	8.99	-0.612735	0.0439542	No Significant Difference
Unigene199404	MYB	1.57	9.29	6.15	5.09	3.2	3.87	#N/A	#N/A	No Significant Difference
Unigene20055	MYB	0.44	0.68	0.64	0.04	0.04	0	#N/A	#N/A	No Significant Difference
Unigene20286	MYB	0.04	0	0	0	0.63	0.04	#N/A	#N/A	No Significant Difference
Unigene20867	MYB	0.74	0.39	0.32	1.71	1.24	0.76	-1.52412	0.0592669	No Significant Difference
Unigene21305	MYB	3.16	4.31	4.17	5.3	4.29	3.92	-0.50402	0.197307	No Significant Difference
Unigene21520	MYB	1.65	0.22	0.65	3.72	1.61	1.67	-1.88244	0.0256663	Down
Unigene22999	MYB	0.15	0.43	0.4	0.05	0.09	0	#N/A	#N/A	No Significant Difference
Unigene23267	MYB	0	0	0	0	0	0	#N/A	#N/A	No Significant Difference
Unigene23385	MYB	0.15	0.1	0.05	0.09	0.84	0.19	#N/A	#N/A	No Significant Difference
Unigene23489	MYB	1.81	2.97	3.05	3.98	3.57	2.64	-0.584808	0.219981	No Significant Difference
Unigene23500	MYB	1.15	0.34	0.87	0.05	0.23	0.38	#N/A	#N/A	No Significant Difference
Unigene23716	MYB	3.81	0.68	1.52	3.31	3.29	6.14	-1.05986	0.198121	No Significant Difference
Unigene24336	MYB	28.92	21.95	25.28	9.15	22.4	28.87	0.14206	0.800433	No Significant Difference
Unigene24551	MYB	0	0.05	0.15	0	0	0.05	#N/A	#N/A	No Significant Difference
Unigene24926	MYB	21.81	23.32	25.44	21.38	27.57	18.19	-0.198875	0.589536	No Significant Difference
Unigene24928	MYB	13.07	13.98	13.71	16.21	12.97	12.94	-0.0555288	0.883123	No Significant Difference
Unigene24931	MYB	0.94	0.9	1.12	1.32	1.18	0.79	-0.296501	0.689273	No Significant Difference
Unigene24959	MYB	139.68	86.68	87.56	39.37	44.16	49.02	0.272969	0.211273	No Significant Difference
Unigene25046	MYB	6.28	3.19	2.68	0.74	0.54	0.52	2.69445	1.6504e-05	Up
Unigene2520	MYB	14.97	10.65	12.56	13.84	11.29	14.01	0.0313471	0.93006	No Significant Difference
Unigene25492	MYB	0.05	0.21	0.1	0	0.05	0.05	#N/A	#N/A	No Significant Difference
Unigene25661	MYB	0	0	0.05	0	0.05	0	#N/A	#N/A	No Significant Difference
Unigene25694	MYB	0	0.16	0.13	0.55	0.63	0.2	#N/A	#N/A	No Significant Difference
Unigene25734	MYB	9.17	14.93	9.32	12.3	11.36	8.9	-0.493466	0.16172	No Significant Difference
Unigene26007	MYB	0.38	1.11	0.59	1.06	0.46	0.16	0.175254	0.895919	No Significant Difference
Unigene26013	MYB	0.16	0	0	0.2	0.66	0.46	#N/A	#N/A	No Significant Difference
Unigene26602	MYB	3	2.03	2.7	3.88	1.98	2.99	-0.268052	0.668278	No Significant Difference
Unigene26931	MYB	0.73	1.56	1.47	2.13	1.42	1.96	-0.843956	0.143495	No Significant Difference
Unigene26957	MYB	6.17	5.6	6.68	14.93	8.98	9.71	-0.7856	0.0450486	No Significant Difference
Unigene27327	MYB	0.34	0.55	0.22	0.11	0.85	1.45	#N/A	#N/A	No Significant Difference
Unigene27828	MYB	0.29	0.11	0.17	0	0.16	0.05	#N/A	#N/A	No Significant Difference
Unigene28755	MYB	0.48	0.17	0.69	0.17	0.61	0.95	#N/A	#N/A	No Significant Difference
Unigene29223	MYB	11.35	4.99	6.97	6.86	6.05	8.54	0.0830987	0.894874	No Significant Difference
Unigene29494	MYB	52.8	53.24	40.96	39.91	56.55	62.04	-0.07338	0.852312	No Significant Difference
Unigene30080	MYB	0.56	0.54	1.02	1.9	0.64	0.82	#N/A	#N/A	No Significant Difference
Unigene30208	MYB	0	0	0	0.12	0.52	0.06	#N/A	#N/A	No Significant Difference
Unigene31771	MYB	0.85	0.75	0.82	0.73	0.73	0.55	#N/A	#N/A	No Significant Difference
Unigene32548	MYB	0.13	0.24	0.24	0	0	0	#N/A	#N/A	No Significant Difference
Unigene33250	MYB	1.03	0.53	0.47	4.58	7.25	9.86	-3.38751	2.52206e-09	Down
Unigene23576	ERF	31.38	15.48	25.05	4.36	4.63	4.61	2.36829	9.93729e-10	Up
Unigene3473	MYB	4.09	20.07	15.6	5.01	6.41	9.28	0.549469	0.362936	No Significant Difference
Unigene3506	MYB	0.5	0.86	1.18	1.47	1.32	0.68	-0.578086	0.261317	No Significant Difference
Unigene6933	EIL	2.66	3.3	3.81	5.89	7.39	6.64	-1.09906	8.38735e-06	Down
Unigene36137	MYB	0.07	0.28	0	4.07	1.18	0.84	#N/A	#N/A	No Significant Difference
Unigene364	MYB	40.67	70.25	62.05	12.52	16.98	18.18	0.662739	0.0298983	No Significant Difference
Unigene37277	MYB	6.14	3.01	4.89	0.85	0.86	0.51	2.60739	1.27464e-05	Up
Unigene37577	MYB	0.54	0.2	0.59	0	0	0	#N/A	#N/A	No Significant Difference
Unigene38138	MYB	1.26	0.23	0.61	0.07	0.59	1.11	#N/A	#N/A	No Significant Difference
Unigene39516	MYB	0.62	0.61	0.94	3.5	4.86	5.12	-2.73376	3.26142e-07	Down
Unigene3981	MYB	12.06	10.97	10.77	16.25	8.14	7.39	0.060947	0.917689	No Significant Difference
Unigene41491	MYB	1.12	1.31	0.5	2.31	0.56	0.56	#N/A	#N/A	No Significant Difference
Unigene4347	MYB	7.44	7.71	7	10.49	6.71	4.7	-0.0612055	0.915677	No Significant Difference
Unigene45484	MYB	3.4	1.53	1.09	2.01	0.61	0.44	0.901028	0.422597	No Significant Difference
Unigene55661	MYB	0.12	0.22	0.79	0.33	0.44	0.89	#N/A	#N/A	No Significant Difference
Unigene60401	MYB	5.7	4.51	7.74	2.02	6.57	8.51	0.179592	0.810045	No Significant Difference
Unigene6480	MYB	7.41	10.38	8.83	8.28	9.79	9.89	-0.164101	0.522881	No Significant Difference
Unigene68028	MYB	0	0	0	0.42	0.14	0	#N/A	#N/A	No Significant Difference
Unigene71758	MYB	0	0	0.31	0.59	0	0	#N/A	#N/A	No Significant Difference
Unigene74678	MYB	0.17	0.16	0	0	0	0	#N/A	#N/A	No Significant Difference
Unigene7889	MYB	4.16	5.3	4.04	2.47	2.94	3.27	0.571537	0.0701933	No Significant Difference
Unigene9897	MYB	16.23	20.47	17.7	13.18	21.99	19.39	-0.0575849	0.871461	No Significant Difference
Unigene104143	MYB_related	0	0	0	1.07	0	0	#N/A	#N/A	No Significant Difference
Unigene111420	MYB_related	0.32	0.86	0	0	0	0	#N/A	#N/A	No Significant Difference
Unigene114540	MYB_related	0	0	0	0	0	0	#N/A	#N/A	No Significant Difference
Unigene118488	MYB_related	1.09	1.59	0.65	2.57	0.32	0.65	#N/A	#N/A	No Significant Difference
Unigene121040	MYB_related	0	0	0	5.37	0	0	#N/A	#N/A	No Significant Difference
Unigene1246	MYB_related	13.68	17.1	16.24	5.17	7.54	7.43	0.959288	0.00775599	No Significant Difference
Unigene13229	MYB_related	3.1	1.2	1.94	3.73	2.37	2.24	-0.766567	0.225404	No Significant Difference
Unigene13359	MYB_related	8.26	5.14	6.33	6.51	7.48	9.93	0.575756	0.132506	No Significant Difference
Unigene134600	MYB_related	0.48	0	0.42	0	0	0	#N/A	#N/A	No Significant Difference
Unigene13769	MYB_related	2.26	1.33	2.48	0.23	0.12	0.12	#N/A	#N/A	No Significant Difference
Unigene13775	MYB_related	43.04	58.07	55.74	78.1	55.16	42.78	0.0196779	0.966389	No Significant Difference
Unigene15534	MYB_related	0.64	0.78	1.06	1.18	1.34	1.35	-0.689492	0.192991	No Significant Difference
Unigene162736	MYB_related	0.77	0.62	0	3.3	0.64	0	#N/A	#N/A	No Significant Difference
Unigene16451	MYB_related	26.39	57.23	49.17	51.74	46.51	45.57	-0.373355	0.275642	No Significant Difference
Unigene17149	MYB_related	20.17	19.06	20.7	13.37	20.31	22.68	-0.297187	0.391445	No Significant Difference
Unigene175807	MYB_related	0.99	3.86	5.69	0	3.98	2.52	#N/A	#N/A	No Significant Difference
Unigene18032	MYB_related	13.48	10.86	9.81	6.94	7.32	5.61	0.714818	0.0429391	No Significant Difference
Unigene180921	MYB_related	0	0	0	0	0	0	#N/A	#N/A	No Significant Difference
Unigene18638	MYB_related	0.75	0.68	1.57	3.57	0.22	0.11	#N/A	#N/A	No Significant Difference
Unigene1865	MYB_related	226.51	351.59	312.63	532.33	491.23	445.41	-0.817479	0.00147517	No Significant Difference
Unigene187479	MYB_related	0	0	0	0	0	0	#N/A	#N/A	No Significant Difference
Unigene18773	MYB_related	9.82	8.15	8.47	0.36	0.24	0.12	5.14917	5.56235e-15	Up
Unigene20375	MYB_related	1.72	0.56	1.11	0.19	0.13	0.2	2.754	0.0023372	Up
Unigene21102	MYB_related	4.32	3.48	6.49	1.16	2.45	1.6	0.996568	0.0410083	No Significant Difference
Unigene21131	MYB_related	65.14	68.47	66.35	53.79	63.12	63.81	-0.0420126	0.867974	No Significant Difference
Unigene21700	MYB_related	86.81	98.41	115.27	72.64	96.3	53.54	0.0200225	0.963089	No Significant Difference
Unigene22291	MYB_related	6.23	12.4	7.75	10.08	9.1	11.87	-0.565368	0.108484	No Significant Difference
Unigene22958	MYB_related	130.8	67.65	66.06	92.51	69.87	69.17	0.143396	0.760909	No Significant Difference
Unigene23864	MYB_related	0.55	0.75	0.57	0.08	0.05	0.13	#N/A	#N/A	No Significant Difference
Unigene26688	MYB_related	3.3	16.71	14.38	6.9	11.3	9.42	0.168469	0.821571	No Significant Difference
Unigene26778	MYB_related	7.1	5.7	8.09	2.54	0.86	0.23	2.39199	0.00372852	Up
Unigene2692	MYB_related	234.47	379.48	428.22	302.29	313.46	264.58	0.268428	0.267546	No Significant Difference
Unigene27071	MYB_related	10.01	6.89	7.55	6.18	5.88	5.28	0.203345	0.650494	No Significant Difference
Unigene28099	MYB_related	9.21	11.69	10.82	6.43	6.5	6.74	0.584226	0.049542	No Significant Difference
Unigene28787	MYB_related	2.5	2.23	2.31	2.22	4.4	3.31	-0.540986	0.275418	No Significant Difference
Unigene29398	MYB_related	0.12	0	0.18	0.45	0.12	0.23	#N/A	#N/A	No Significant Difference
Unigene30401	MYB_related	4.76	5.21	3.6	3.67	2.51	2.41	0.698644	0.2418	No Significant Difference
Unigene31073	MYB_related	0.42	1.64	0.44	1.78	1.37	2.42	#N/A	#N/A	No Significant Difference
Unigene32311	MYB_related	65.29	41.09	51.77	37.28	38.64	22.73	-0.0690698	0.882526	No Significant Difference
Unigene32323	MYB_related	0.47	0.51	0.19	3.83	1.18	0.63	#N/A	#N/A	No Significant Difference
Unigene3278	MYB_related	26.34	25.87	30.48	21.5	21.93	23.28	0.696314	0.00105911	No Significant Difference
Unigene32890	MYB_related	0.54	0.32	0.41	0.3	0.43	0.1	#N/A	#N/A	No Significant Difference
Unigene3524	Dof	25.64	26.3	30.21	10.48	11.46	10.14	1.2864	1.128e-11	Up
Unigene3365	MYB_related	1.03	0.9	1.08	0.42	0.83	0.92	0.456329	0.411368	No Significant Difference
Unigene3403	MYB_related	9.11	9.94	9	7.06	6.33	6	0.397971	0.165982	No Significant Difference
Unigene15601	DBB	121.17	137.94	154.2	35.03	59.35	65.76	1.31334	3.35327e-06	Up
Unigene35999	MYB_related	1.11	2.68	4.06	3.25	2.65	3.4	-0.284212	0.69467	No Significant Difference
Unigene21019	CO-like	4.68	2.23	3.87	1.85	1.49	1.56	1.33041	0.0140852	Up
Unigene39537	MYB_related	1.14	0	0	0	0.99	1.23	#N/A	#N/A	No Significant Difference
Unigene39930	MYB_related	0	0	0	0.08	0.15	0	#N/A	#N/A	No Significant Difference
Unigene40088	MYB_related	1.26	0.22	0.08	0	0	0.16	#N/A	#N/A	No Significant Difference
Unigene12118	C3H	1.54	1.09	1.16	3.16	1.91	2.22	-1.00919	0.0425553	Down
Unigene14660	C3H	13.33	4.69	6.14	22.17	14.46	18.13	-1.73471	8.29618e-06	Down
Unigene4549	MYB_related	2.91	1.72	3.62	1.92	1.99	2.04	0.398021	0.434018	No Significant Difference
Unigene4558	MYB_related	7.35	9.15	10.45	9.78	10.06	10.09	0.131181	0.634916	No Significant Difference
Unigene45965	MYB_related	0.38	1.55	0.74	0.2	0.1	0.1	#N/A	#N/A	No Significant Difference
Unigene48870	MYB_related	0.2	0	0.45	0	0	0	#N/A	#N/A	No Significant Difference
Unigene49434	MYB_related	0.93	0.49	0.6	0	0	0.1	#N/A	#N/A	No Significant Difference
Unigene50374	MYB_related	0.64	0.1	0.1	0.39	0.1	0.4	#N/A	#N/A	No Significant Difference
Unigene54884	MYB_related	15.39	10.13	9.6	16.02	14.87	14.72	-0.428679	0.32905	No Significant Difference
Unigene5793	MYB_related	9.14	9.18	11.32	5.99	5.22	4.07	0.861462	0.00550081	No Significant Difference
Unigene5996	MYB_related	8.81	7.55	8.47	7.47	7.72	8.01	-0.125872	0.640325	No Significant Difference
Unigene60499	MYB_related	0	0	0	0	0.12	0	#N/A	#N/A	No Significant Difference
Unigene6125	MYB_related	47.5	41.47	41.37	25.59	36.45	33.16	-0.113566	0.659395	No Significant Difference
Unigene64243	MYB_related	0.8	1.56	2.19	0	0.19	2.36	#N/A	#N/A	No Significant Difference
Unigene6448	MYB_related	113.78	104.25	118.56	64	97.25	98.41	0.13812	0.675217	No Significant Difference
Unigene67630	MYB_related	0	0	0	0	0.28	0	#N/A	#N/A	No Significant Difference
Unigene6859	MYB_related	15.82	20.06	19.45	18.77	21.23	21.07	-0.163899	0.477726	No Significant Difference
Unigene7361	MYB_related	11.85	11.94	15.26	6.94	7.78	7.85	0.63795	0.00483933	No Significant Difference
Unigene73670	MYB_related	0.69	0.34	0.16	0	0	0	#N/A	#N/A	No Significant Difference
Unigene74001	MYB_related	0	0.16	0	0.46	1.23	0.16	#N/A	#N/A	No Significant Difference
Unigene7872	MYB_related	23.41	18.9	16.85	15.44	11.38	10.38	-0.157211	0.646684	No Significant Difference
Unigene8403	MYB_related	72.46	56.14	57.6	86.81	78.78	68.48	-0.417255	0.196382	No Significant Difference
Unigene90073	MYB_related	0	0	0	0	0	0	#N/A	#N/A	No Significant Difference
Unigene93362	MYB_related	0.24	0.43	0.88	3.65	2.14	5.46	#N/A	#N/A	No Significant Difference
Unigene10141	NAC	36.87	28.78	31.07	50.76	44.85	50.06	0.157568	0.597547	No Significant Difference
Unigene1041	NAC	23.27	25.93	31.98	30.65	19.63	20.1	0.151849	0.617483	No Significant Difference
Unigene11316	NAC	81.41	108.96	131.37	53.01	69.83	72.85	0.514247	0.0993747	No Significant Difference
Unigene15588	C3H	8.83	2.82	3.65	5.93	10.57	14.14	-1.39859	0.00689523	Down
Unigene31529	C3H	7.9	7.18	10.35	23.07	19.86	16.94	-1.03481	0.00248791	Down
Unigene11663	NAC	115.28	106.52	115.69	54.81	67.71	63.28	0.0574841	0.812795	No Significant Difference
Unigene12558	NAC	23.87	13.8	15.82	58.55	23.17	24.15	-0.977094	0.0871819	No Significant Difference
Unigene8328	C3H	9.32	10.05	8.08	1.66	1.9	1.07	2.36454	4.4126e-12	Up
Unigene132711	NAC	0	0	0.41	1.21	0	0.41	#N/A	#N/A	No Significant Difference
Unigene13342	NAC	6.76	10.78	11.93	10.36	9.62	8.01	-0.382833	0.241073	No Significant Difference
Unigene13874	NAC	27.67	14.8	17.09	24.7	24.92	25.17	-0.662208	0.0493222	No Significant Difference
Unigene32430	ERF	5	3	3.1	0.62	0.19	0.38	3.16805	4.22442e-06	Up
Unigene144665	NAC	0	0.68	0.69	1.93	0	1.89	#N/A	#N/A	No Significant Difference
Unigene152855	NAC	0	0	1.11	1.12	1.09	0.57	#N/A	#N/A	No Significant Difference
Unigene16075	NAC	2.29	3.52	3.62	0.96	2.34	3.8	0.363414	0.5979	No Significant Difference
Unigene9130	C3H	9.75	8.1	9.09	27.44	16.27	16.62	-1.05166	0.00250678	Down
Unigene16921	NAC	4.9	1.45	4.02	1.76	3.58	8.01	-0.426042	0.646549	No Significant Difference
Unigene17092	NAC	1.23	0	0.55	0	0.1	0.43	#N/A	#N/A	No Significant Difference
Unigene17183	NAC	6.75	7.54	6.78	5.63	7.62	7.29	-0.0525954	0.879414	No Significant Difference
Unigene17698	NAC	1.1	0.34	2.01	3.18	1.92	1.41	-0.945158	0.220412	No Significant Difference
Unigene17963	NAC	37.44	42.9	54.22	26.05	43.62	45.5	0.177677	0.618271	No Significant Difference
Unigene17966	NAC	0	0	0	0.08	0	0	#N/A	#N/A	No Significant Difference
Unigene18112	NAC	10.26	6.14	7.8	8.65	7.61	8.89	-0.0127785	0.979988	No Significant Difference
Unigene7304	ERF	2.26	1.58	2	0.23	0.48	0	3.43119	8.52978e-05	Up
Unigene18621	NAC	23.8	10.51	15.01	13.45	18.1	20.2	-0.107256	0.849296	No Significant Difference
Unigene18737	NAC	1.53	1.18	1.73	1.22	1.37	1.27	0.1092	0.864693	No Significant Difference
Unigene18865	NAC	0.98	0.45	1	1.47	0.86	1.45	-0.775167	0.278743	No Significant Difference
Unigene11332	FAR1	6.6	4.34	5.49	0.19	0	0	6.88482	7.26445e-07	Up
Unigene190012	NAC	0	0	0	0	0	0	#N/A	#N/A	No Significant Difference
Unigene191844	NAC	0	2.02	0	3.34	1.05	0	#N/A	#N/A	No Significant Difference
Unigene19416	NAC	0.52	1.25	2.39	1.97	1.21	0.94	-0.11446	0.904546	No Significant Difference
Unigene19482	NAC	0.04	0	0.07	0.16	0.41	0.57	#N/A	#N/A	No Significant Difference
Unigene197837	NAC	0	0	0	1.25	0	0	#N/A	#N/A	No Significant Difference
Unigene20847	NAC	5.2	4.03	3.95	4.79	3.76	6.15	-0.539464	0.246919	No Significant Difference
Unigene21619	NAC	19.52	9.04	13.36	8.41	15.42	21.45	-0.127479	0.845456	No Significant Difference
Unigene22128	NAC	16.05	7.33	11.54	6.88	5.83	7.43	0.673653	0.12483	No Significant Difference
Unigene92245	C3H	7.41	3.16	3.33	10.9	10.34	9.42	-1.24467	0.04422	Down
Unigene22435	NAC	19.28	37.37	45.24	19.58	23.5	29.4	0.412144	0.340133	No Significant Difference
Unigene22837	NAC	0.64	0.56	0.67	0.05	0.37	0.41	#N/A	#N/A	No Significant Difference
Unigene9879	C3H	5.74	8.8	5.98	1.22	1.77	2.73	3.10548	1.04643e-09	Up
Unigene23643	NAC	0.45	0.53	0.59	2.43	1.13	1.37	-1.74759	0.00954492	Down
Unigene23731	NAC	0.54	0.4	0.45	0.69	0.19	0.56	#N/A	#N/A	No Significant Difference
Unigene23732	NAC	9.82	4.55	5.67	2.17	4.11	4.33	0.460198	0.457637	No Significant Difference
Unigene24695	NAC	0.92	0.99	1.67	1.71	1.01	0.92	-0.400924	0.634899	No Significant Difference
Unigene24815	NAC	0.65	0.23	1.35	0.56	0.43	1.42	#N/A	#N/A	No Significant Difference
Unigene25507	NAC	0.16	0.15	0.31	0.15	0.2	0.15	#N/A	#N/A	No Significant Difference
Unigene25587	NAC	0.32	0.57	0.47	1.25	0.45	0.25	#N/A	#N/A	No Significant Difference
Unigene2598	NAC	52.77	15.56	16.72	19.39	13.44	18.46	0.0556921	0.934464	No Significant Difference
Unigene26154	NAC	8.23	6.13	7.25	8.36	5.44	4.77	0.149071	0.786914	No Significant Difference
Unigene26851	NAC	0	0	0	2.04	0.74	1.53	-7.24171	2.68806e-06	Down
Unigene27995	NAC	0	0.17	0.12	0.06	0	0.06	#N/A	#N/A	No Significant Difference
Unigene28003	NAC	22.1	12.68	15.47	14.88	14.99	25.87	-0.265194	0.625771	No Significant Difference
Unigene2855	NAC	78.88	60.33	63.01	55.7	54.64	51.78	0.331645	0.0615129	No Significant Difference
Unigene29005	NAC	83.21	22.66	38.51	32.13	35.91	37.14	0.198362	0.744694	No Significant Difference
Unigene29235	NAC	3.95	3.5	5.06	4	4.54	8.05	-0.453117	0.331193	No Significant Difference
Unigene30718	NAC	4.22	5.74	5.95	1.21	0.95	0.79	#N/A	#N/A	No Significant Difference
Unigene33361	NAC	8.38	10	8.17	25.76	11.4	10.72	-0.993053	0.0679022	No Significant Difference
Unigene3552	NAC	38.19	37.18	39.25	35.19	44.99	43.29	-0.146546	0.569825	No Significant Difference
Unigene36810	NAC	0.23	0.07	0.29	0.84	0.92	0.43	#N/A	#N/A	No Significant Difference
Unigene39899	NAC	0.25	0.47	0.56	2.06	0.38	0.7	#N/A	#N/A	No Significant Difference
Unigene42289	NAC	40.07	10.93	18.31	2.59	0.86	6.57	1.53821	0.0556446	No Significant Difference
Unigene4308	NAC	83.43	69.98	73.27	92.75	77.88	73.34	-0.214294	0.318533	No Significant Difference
Unigene45084	NAC	2.99	4.98	3.55	2.97	5.56	6.27	-0.51588	0.361054	No Significant Difference
Unigene49494	NAC	4.84	1.97	2.4	1.24	1.22	5.62	-0.00612725	0.99569	No Significant Difference
Unigene4432	FAR1	1.16	2.72	2.81	0.06	0.06	0	6.1565	4.43251e-11	Up
Unigene59820	NAC	2.63	3.53	5.24	1.93	1.45	7.68	0.0168236	0.988195	No Significant Difference
Unigene70910	NAC	0	0.45	0.45	0.73	0.59	0.3	#N/A	#N/A	No Significant Difference
Unigene76510	NAC	0	0	0	0	0	0	#N/A	#N/A	No Significant Difference
Unigene7906	NAC	1.45	4	3.88	2.82	4.46	4.47	-0.461129	0.440861	No Significant Difference
Unigene81315	NAC	0	0	0	0	0	0	#N/A	#N/A	No Significant Difference
Unigene82027	NAC	0	0	0	0	0.35	0.18	#N/A	#N/A	No Significant Difference
Unigene90190	NAC	0.22	0.2	0.42	0.41	0.2	0	#N/A	#N/A	No Significant Difference
Unigene4674	C3H	1.6	11.79	10.81	1.93	6.4	5.6	1.28345	0.0399208	Up
Unigene96615	NAC	3.3	11.06	16.92	24.62	13.59	5.79	-0.625894	0.514001	No Significant Difference
Unigene97551	NAC	0.73	5.07	4.29	3.78	8.7	8.41	-0.991184	0.329331	No Significant Difference
Unigene104106	NF-X1	3.72	5.07	7.31	5.72	5.53	5.52	#N/A	#N/A	No Significant Difference
Unigene13372	NF-X1	1.34	6.13	6.17	2.04	3.54	3.71	0.361191	0.654341	No Significant Difference
Unigene12747	NF-YA	2.65	4.8	4.66	2.25	4.68	3.75	-0.213937	0.703333	No Significant Difference
Unigene14240	NF-YA	70.47	50.32	47.26	70.19	50.25	59.06	-0.0815031	0.860828	No Significant Difference
Unigene23188	NF-YA	2.73	2.2	3.92	2.69	3.9	3.04	-0.211272	0.672001	No Significant Difference
Unigene5002	NF-YA	19.4	21.02	24.65	15.51	17.58	18.71	0.369782	0.0991519	No Significant Difference
Unigene8365	NF-YA	15.99	11.59	17.41	9.94	19.38	21.86	-0.215137	0.654748	No Significant Difference
Unigene6630	C3H	7.37	13.63	18.13	2.11	3.88	4.43	1.69398	2.83073e-05	Up
Unigene15100	NF-YB	35.03	30.49	44.37	20.91	18.03	15.01	-0.197361	0.579942	No Significant Difference
Unigene158533	NF-YB	0	0	0	0	0	0	#N/A	#N/A	No Significant Difference
Unigene173949	NF-YB	0	0	0	0.8	0	0	#N/A	#N/A	No Significant Difference
Unigene17821	NF-YB	42.27	37.36	41.82	77.84	64.38	60.4	-0.617817	0.0193116	No Significant Difference
Unigene184582	NF-YB	0	0	0.94	0	0	0	#N/A	#N/A	No Significant Difference
Unigene19504	NF-YB	2.26	3.05	4.49	2.02	4.5	4.43	-0.203887	0.747416	No Significant Difference
Unigene31085	NF-YB	96.97	92.39	94.46	52.9	60.38	54.78	0.54127	0.0268765	No Significant Difference
Unigene31326	NF-YB	16.87	6.03	9.29	17.29	17.29	18.15	-0.738575	0.16925	No Significant Difference
Unigene31418	NF-YB	94.3	169.7	156.37	160.38	171.86	168.74	-0.38423	0.209887	No Significant Difference
Unigene32596	NF-YB	16.52	13.64	15.08	14.42	14.24	14.17	0.0198243	0.956183	No Significant Difference
Unigene33862	NF-YB	11.84	6.98	10.11	4.46	5.87	5.5	0.733742	0.0858292	No Significant Difference
Unigene11400	C2H2	1.28	1.66	1.43	10.09	4.66	3.73	-2.28989	2.64288e-05	Down
Unigene44659	NF-YB	1.54	0.1	0.1	0.6	1.04	2.11	#N/A	#N/A	No Significant Difference
Unigene48806	NF-YB	0.31	2.42	1.18	22.29	7.86	2.59	-3.21291	0.00107968	Down
Unigene56114	NF-YB	0.36	0	0	0.99	0.77	0.67	#N/A	#N/A	No Significant Difference
Unigene65512	NF-YB	1.05	3.17	3.38	1.59	4.5	2.96	-1.02538	0.276902	No Significant Difference
Unigene80410	NF-YB	0	0	0	0	0	0	#N/A	#N/A	No Significant Difference
Unigene95742	NF-YB	1.24	1.8	2.07	3.57	4.21	2.49	#N/A	#N/A	No Significant Difference
Unigene102798	NF-YC	2.22	2.25	0	4.29	1.24	1.31	#N/A	#N/A	No Significant Difference
Unigene112084	NF-YC	0	0	0	0	0	0	#N/A	#N/A	No Significant Difference
Unigene1237	NF-YC	16.37	20.73	14.02	22.22	19.18	11.5	0.0919878	0.857751	No Significant Difference
Unigene16122	NF-YC	65.91	81.78	93.75	97.22	93.65	96.16	-0.316008	0.240157	No Significant Difference
Unigene168103	NF-YC	0	0	0	0	0	0	#N/A	#N/A	No Significant Difference
Unigene13507	C2H2	32.47	22.51	30.44	6.92	9.9	11.41	1.54432	1.74506e-06	Up
Unigene23272	C2H2	3.73	13.51	6.94	24.29	15.07	10.19	-1.2634	0.0393599	Down
Unigene19644	NF-YC	16.32	14.94	11.8	21.47	19.53	18.37	-0.629652	0.0271185	No Significant Difference
Unigene26625	C2H2	22	26.89	20.93	11.64	7.47	6.85	1.0475	0.00586014	Up
Unigene2825	NF-YC	210.6	121.59	130.54	202.62	174.69	169.91	-0.366186	0.363516	No Significant Difference
Unigene50343	NF-YC	0	0	0	0.1	0.1	0.1	#N/A	#N/A	No Significant Difference
Unigene1067	Nin-like	1.43	1.07	1.39	0.64	0.65	0.76	0.882641	0.0237368	No Significant Difference
Unigene113595	Nin-like	0	0	1.21	0	0	0	#N/A	#N/A	No Significant Difference
Unigene32652	C2H2	30.84	24.31	29.16	10.89	14.05	12.58	1.01698	6.79831e-05	Up
Unigene36572	C2H2	5.79	4.18	4.95	3	2.18	1.91	1.00484	0.0382807	Up
Unigene12683	Nin-like	7.51	6.56	5.69	10.56	12.13	10.71	-0.640533	0.0496321	No Significant Difference
Unigene12931	Nin-like	15.65	13.13	13.97	20.07	16.89	16.84	-0.319341	0.227093	No Significant Difference
Unigene13644	Nin-like	2.59	5	5.21	6.47	9.29	11.54	-0.749657	0.0759559	No Significant Difference
Unigene1406	Nin-like	16.85	52.24	58.67	15.35	21.56	22.14	0.723871	0.0179254	No Significant Difference
Unigene979	C2H2	15.43	10.05	9.35	83.44	48.68	44.22	-1.40156	7.2704e-05	Down
Unigene183804	Nin-like	16.45	20.2	20.95	11.47	19.43	9.07	0.502065	0.527406	No Significant Difference
Unigene20089	Nin-like	0	0	0	0.07	0.55	0.17	#N/A	#N/A	No Significant Difference
Unigene2093	Nin-like	36.37	34.32	34.62	38.14	40.04	43.31	-0.279915	0.170766	No Significant Difference
Unigene2114	Nin-like	4.27	10.17	12.7	2.53	3.62	4.47	0.929909	0.018854	No Significant Difference
Unigene21561	Nin-like	0.88	0.67	0.5	0.96	1.4	1.63	-0.991388	0.123575	No Significant Difference
Unigene2353	Nin-like	3.62	4.57	6.41	5.1	5.21	5.36	-0.185258	0.594341	No Significant Difference
Unigene23674	Nin-like	1.45	1.28	1.08	1.7	2.1	1.18	-0.307123	0.660329	No Significant Difference
Unigene24299	Nin-like	0.66	2.01	1.66	1.66	3.36	3.16	-0.656492	0.442589	No Significant Difference
Unigene92611	HSF	4.29	11.06	9.91	0	0	0	6.82003	1.43798e-05	Up
Unigene25689	Nin-like	0.11	0.16	0.16	0	0.84	0	#N/A	#N/A	No Significant Difference
Unigene15380	LBD	19.44	15.93	15.99	0	0	0	10.8137	3.23377e-17	Up
Unigene29399	Nin-like	5.17	2.41	3.58	3.5	4.01	3.44	-0.330436	0.54254	No Significant Difference
Unigene30608	Nin-like	15.92	48.08	50.53	13.3	27.73	32.96	0.649732	0.28039	No Significant Difference
Unigene34261	Nin-like	7.55	5.21	6.66	8.71	6.66	4.9	-0.287478	0.623499	No Significant Difference
Unigene36549	Nin-like	0.83	5.84	2.05	4.45	6.64	10.04	-1.77112	0.00363833	Down
Unigene22927	bZIP	2.22	3.4	1.65	8.11	4.88	3.34	-1.33899	0.0221999	Down
Unigene38464	Nin-like	1.99	0	0.54	1.78	0.15	0.22	#N/A	#N/A	No Significant Difference
Unigene39107	Nin-like	1.05	3.65	1.71	3.88	2.55	2.8	-0.598947	0.372084	No Significant Difference
Unigene41656	Nin-like	1.84	0.92	0.84	0.48	0.8	0.32	#N/A	#N/A	No Significant Difference
Unigene42217	Nin-like	0.7	0.5	0.27	1.43	0.67	0.52	#N/A	#N/A	No Significant Difference
Unigene49797	Nin-like	48.69	34.53	37.17	30.56	28.62	27.19	0.451309	0.189105	No Significant Difference
Unigene40310	LBD	7.83	6.52	7.79	0	0	0	8.95259	1.5843e-11	Up
Unigene54065	Nin-like	0.8	0.65	0.55	0	0	0	#N/A	#N/A	No Significant Difference
Unigene27769	MIKC_MADS	2.81	4.1	3.01	0.23	0.56	0.74	2.78497	6.21562e-06	Up
Unigene2699	bZIP	20.11	31.34	29.86	54.73	50.58	54.31	-1.05	2.54838e-05	Down
Unigene14247	NAC	5.38	3.48	2.93	0.53	0.7	0.64	2.60823	9.5453e-08	Up
Unigene9305	NAC	50.9	25.99	30.11	0.24	0.59	0.41	6.79052	2.57393e-25	Up
Unigene64631	Nin-like	63.09	142.2	147.81	53.82	59.91	65.93	0.695194	0.119295	No Significant Difference
Unigene28944	bZIP	4.62	3.25	2.6	13.29	14.04	11.63	-1.19428	0.00391634	Down
Unigene68902	Nin-like	0.15	0.29	0.22	0	0	0.21	#N/A	#N/A	No Significant Difference
Unigene70504	Nin-like	0.95	1.04	1.5	0	0	0	#N/A	#N/A	No Significant Difference
Unigene31725	bZIP	24.01	4.47	8.76	1.43	1.34	1.94	3.22278	2.37944e-05	Up
Unigene9146	Nin-like	21.89	21.79	30.45	21.41	27.39	26.07	-0.0600082	0.826075	No Significant Difference
Unigene13596	RAV	8.78	5.45	4.86	6.1	4.15	4.72	0.286362	0.598626	No Significant Difference
Unigene6072	S1Fa-like	6.71	4.92	6.31	6.03	2.74	3.26	0.705395	0.166262	No Significant Difference
Unigene11428	SBP	2.78	6.58	4.02	2.26	1.73	3.47	0.882658	0.110921	No Significant Difference
Unigene117771	SBP	2.86	7.54	6.23	2.26	4.39	6.13	0.333304	0.730328	No Significant Difference
Unigene1356	SBP	212.77	179.27	178.21	153.13	178.44	150.73	0.612261	0.0339595	No Significant Difference
Unigene15482	SBP	28.18	21.25	23.06	31.02	11.41	10.03	0.404905	0.549448	No Significant Difference
Unigene15886	SBP	3.64	2.2	2.03	2.65	4.19	4.25	-0.699226	0.155307	No Significant Difference
Unigene18837	SBP	3.72	3.67	5.2	7.72	3.46	2.83	-0.279395	0.671131	No Significant Difference
Unigene19448	SBP	29.84	38.59	45.28	12.92	17.42	22.41	0.587723	0.0271943	No Significant Difference
Unigene22666	SBP	33.68	24.13	25.26	29.32	24.61	19.85	0.110254	0.812342	No Significant Difference
Unigene23220	SBP	22.77	22.57	26.24	14.54	14.22	13.76	0.712545	0.00222455	No Significant Difference
Unigene3898	bZIP	11.75	10.54	10.99	1.07	1.64	1.32	2.36153	2.631e-16	Up
Unigene39159	SBP	4.68	4.47	3.51	3	3.16	3.79	0.294613	0.550849	No Significant Difference
Unigene41312	SBP	0.94	3.42	2.97	1.27	1.43	1.2	0.818519	0.286194	No Significant Difference
Unigene42154	SBP	8.63	6.23	7.15	16.81	5.19	3.36	-0.310148	0.732134	No Significant Difference
Unigene424	SBP	89.23	85.4	84.35	72.84	76.2	84.2	0.338068	0.287906	No Significant Difference
Unigene43782	SBP	2.35	3.08	2.41	5.46	2.63	1.83	-0.354106	0.653501	No Significant Difference
Unigene49269	SBP	1.34	0.49	0.69	0	0.57	0	#N/A	#N/A	No Significant Difference
Unigene51529	SBP	1.19	1.64	1.04	2.21	0.1	0.1	#N/A	#N/A	No Significant Difference
Unigene62194	SBP	1.08	0.51	0.77	0	0	0.13	#N/A	#N/A	No Significant Difference
Unigene9527	SBP	10.3	9.26	9.58	13.11	8.98	6.26	0.203375	0.684476	No Significant Difference
Unigene9594	SBP	4.7	3.63	4.51	2.92	3.59	2.84	0.370638	0.246546	No Significant Difference
Unigene11502	SRS	21.17	10.44	11.85	10.37	9.38	8.12	0.641852	0.00821748	No Significant Difference
Unigene150667	SRS	0	0	0	0.54	0.52	1.64	#N/A	#N/A	No Significant Difference
Unigene17941	SRS	1.47	1.12	1.82	0.88	0.91	0.77	0.701693	0.20506	No Significant Difference
Unigene19331	SRS	4.83	2.79	4.79	3.82	4.41	3.83	-0.0151525	0.97734	No Significant Difference
Unigene19371	SRS	1.85	1.87	2.01	1.12	1.01	1.54	0.576325	0.241227	No Significant Difference
Unigene29127	SRS	3.01	3.58	4.12	1.98	1.96	2.3	0.570758	0.212905	No Significant Difference
Unigene5878	STAT	9.2	10.73	11.91	5.14	6.25	5.32	0.969119	4.04509e-05	No Significant Difference
Unigene12199	TALE	29.69	18.41	22.84	17.81	21.78	19.62	0.196065	0.5027	No Significant Difference
Unigene15206	TALE	3.33	2.35	3.09	3.5	1.69	1.56	0.427515	0.472052	No Significant Difference
Unigene15706	TALE	5.15	10.06	11.14	4.81	2.81	0.32	1.46035	0.0879207	No Significant Difference
Unigene17391	TALE	80.35	120.16	123.69	62.22	78.57	82.01	0.341429	0.149883	No Significant Difference
Unigene18004	TALE	206.19	132.33	163.11	191.93	220.84	246.3	-0.175209	0.617831	No Significant Difference
Unigene19868	TALE	0.96	0.3	0.81	1.17	4.18	4.88	-2.32852	0.00181267	Down
Unigene22588	TALE	21.32	23.01	22.17	21.61	16.28	9.96	0.406144	0.363289	No Significant Difference
Unigene23375	TALE	16.83	19.28	15.6	13.82	13.64	12.31	0.301127	0.313528	No Significant Difference
Unigene2498	TALE	9.35	10.36	12.2	11.85	13.23	13.89	-0.348496	0.103839	No Significant Difference
Unigene176947	bHLH	7.35	4.22	1.08	32.05	27.4	32.28	-3.05973	7.56747e-05	Down
Unigene21929	bHLH	4.65	4.78	6.29	10.09	14.9	14.24	-1.67472	1.66747e-10	Down
Unigene62166	bHLH	70.79	97.03	78.9	637.19	240.15	194.3	-2.22903	3.89554e-05	Down
Unigene13420	TCP	6.65	6.64	6.31	6.58	7.33	8.51	-0.325596	0.267045	No Significant Difference
Unigene1453	TCP	11.62	12.24	12.4	12.44	12.85	13.77	0.0866003	0.77559	No Significant Difference
Unigene14761	TCP	0.07	0.17	0.04	0	0	0	#N/A	#N/A	No Significant Difference
Unigene59104	Nin-like	4.32	4.25	7.03	0	0	0	7.84047	2.44966e-08	Up
Unigene16619	bHLH	26.39	29.81	25.68	11.14	5.33	3.02	2.20693	4.11761e-06	Up
Unigene28338	bHLH	9.08	14.57	11.32	40.78	28.48	31.4	-1.59556	1.42111e-06	Down
Unigene16178	TCP	1.29	2.65	1.6	2.06	1.14	0.86	0.34351	0.64064	No Significant Difference
Unigene16198	TCP	1.41	1.4	1.15	0.57	0.47	0.04	1.80538	0.0561062	No Significant Difference
Unigene17203	TCP	0.44	0.55	0.51	0.74	0.33	0.11	#N/A	#N/A	No Significant Difference
Unigene17209	TCP	39.77	30.84	36.45	18.62	25.64	24.63	0.205943	0.525323	No Significant Difference
Unigene17646	TCP	0.89	2.01	2.49	1.1	1.87	1.93	-0.123775	0.852673	No Significant Difference
Unigene18127	TCP	10.58	8.93	10.3	4.95	4.86	3.59	0.764798	0.0288957	No Significant Difference
Unigene19576	TCP	2.08	1.97	2.11	2.14	2.97	2.21	-0.30874	0.490582	No Significant Difference
Unigene19987	TCP	0.22	0.21	0.26	0.45	0.21	0.33	#N/A	#N/A	No Significant Difference
Unigene21803	TCP	8.12	19.95	22.81	7.62	11.54	15.7	0.481025	0.373026	No Significant Difference
Unigene2202	TCP	0.43	0.83	0.71	1.26	2.2	1.26	-1.17813	0.00755481	Down
Unigene22264	TCP	33.86	18.82	25.1	14.51	26.32	20.99	0.0834278	0.864872	No Significant Difference
Unigene13397	bHLH	52.94	21.8	37.92	2.09	4.95	8.56	2.6792	1.80795e-06	Up
Unigene23808	TCP	0.05	0.05	0	0.09	0	0	#N/A	#N/A	No Significant Difference
Unigene24999	TCP	1.89	3.09	3.27	0.29	0.25	0.35	3.13743	1.16181e-07	Up
Unigene34126	TCP	0.77	0.94	0.48	0.52	0.26	0.33	#N/A	#N/A	No Significant Difference
Unigene39258	TCP	2.02	2.47	3.02	1.05	1.17	1.37	0.987839	0.0747575	No Significant Difference
Unigene43684	TCP	0.27	0.56	0.61	0.84	0.59	0.34	#N/A	#N/A	No Significant Difference
Unigene3589	bHLH	70	82.03	84.86	6.56	15.4	12.96	2.96056	2.64447e-23	Up
Unigene72080	TCP	0.33	0.15	0.15	0.15	0.75	0.61	#N/A	#N/A	No Significant Difference
Unigene73527	TCP	1.01	4.06	3.33	0	0	0	6.53831	0.000103628	Up
Unigene7487	TCP	22.8	26.29	31.45	19.94	25.16	22.96	-0.137753	0.622384	No Significant Difference
Unigene7588	TCP	83.55	56.28	67.65	36.05	40.8	36.21	0.783807	0.0256859	No Significant Difference
Unigene9645	TCP	17.16	15.39	16.89	10.87	14.37	13.21	0.242342	0.406546	No Significant Difference
Unigene10331	Trihelix	13.57	9.57	10.45	8.67	8.76	8.13	0.320643	0.377693	No Significant Difference
Unigene10648	Trihelix	32.33	28.28	24.64	725.82	18.04	14.11	#N/A	#N/A	No Significant Difference
Unigene11568	Trihelix	16.04	16.16	17.26	16.74	15.94	14.94	-0.0357727	0.904546	No Significant Difference
Unigene11940	Trihelix	7.31	7.49	7.55	17.91	13.08	10.24	-0.964219	0.00760967	No Significant Difference
Unigene12252	Trihelix	7.93	8.12	10.19	7.94	9.5	8.87	-0.075891	0.806365	No Significant Difference
Unigene125921	Trihelix	0	0	1.1	0.36	1.07	2.21	#N/A	#N/A	No Significant Difference
Unigene3719	bHLH	12.3	14.61	15.48	1.28	2.39	3.29	3.42092	1.08295e-18	Up
Unigene14387	Trihelix	5.92	4.01	3.28	2.28	1.03	0.33	0.840121	0.339973	No Significant Difference
Unigene14603	Trihelix	17.51	15.16	13.35	14.48	14.88	15.1	-0.0414717	0.909955	No Significant Difference
Unigene14690	Trihelix	17.21	9.56	11.24	16.59	9.69	8.32	-0.402494	0.389683	No Significant Difference
Unigene17118	Trihelix	24.52	23.66	22.1	27.24	24.68	24.79	-0.250723	0.429726	No Significant Difference
Unigene17653	Trihelix	8.5	23.25	23	12.64	11.18	14.57	-0.191541	0.682268	No Significant Difference
Unigene18420	Trihelix	1.17	1.22	1	1.16	0.66	0.74	-0.425072	0.574871	No Significant Difference
Unigene19425	Trihelix	4.14	4.89	6.71	9.68	9.96	8.31	-0.794783	0.00796227	No Significant Difference
Unigene19442	Trihelix	81.1	61.67	63	55.71	38.8	37.59	0.345796	0.358353	No Significant Difference
Unigene2329	Trihelix	19.74	11.93	13.71	27.35	19.31	17.49	-0.486981	0.215984	No Significant Difference
Unigene24913	Trihelix	11.57	7.57	7.68	7.46	8.24	6.67	0.214808	0.639305	No Significant Difference
Unigene25720	Trihelix	3.93	2.17	2.1	1.09	2.73	0.84	0.773241	0.298875	No Significant Difference
Unigene27024	Trihelix	24.91	38.71	44.07	21.05	33.48	29.04	0.222401	0.543615	No Significant Difference
Unigene3587	Trihelix	21.36	23.47	27.95	22.18	24.22	15.71	0.151055	0.676948	No Significant Difference
Unigene4179	Trihelix	33.89	22.68	25.73	39.41	50.27	47.96	-0.735256	0.0136451	No Significant Difference
Unigene44790	Trihelix	1.85	61.95	50.07	15	24.39	25.08	0.721817	0.519284	No Significant Difference
Unigene548	Trihelix	17.29	27.43	29.19	14.28	23.73	25.85	0.409863	0.137031	No Significant Difference
Unigene63017	Trihelix	0.27	0.77	0.79	0.76	0.13	0.13	#N/A	#N/A	No Significant Difference
Unigene6550	Trihelix	6.87	10.25	11.64	8.48	9.03	8.36	0.0768211	0.863922	No Significant Difference
Unigene7041	Trihelix	10.02	6.32	7.84	9.72	9.12	8.08	-0.203691	0.635997	No Significant Difference
Unigene7499	Trihelix	34.94	22.81	27.1	30.62	42.06	34.65	-0.443191	0.158497	No Significant Difference
Unigene8377	Trihelix	28.32	24.42	24.05	16.8	21.62	21.98	0.296497	0.298635	No Significant Difference
Unigene8666	Trihelix	15.03	13.45	19.55	12.59	16.3	13.59	-0.193182	0.462644	No Significant Difference
Unigene11484	VOZ	17.6	12.82	14.58	14.89	15.29	13.27	-0.051088	0.897752	No Significant Difference
Unigene5014	VOZ	19.5	16.3	15.94	38.76	31.78	31.37	-0.692006	0.0476864	No Significant Difference
Unigene5513	VOZ	36.28	33.75	36.16	29.54	31.31	29.25	0.166658	0.493368	No Significant Difference
Unigene24056	Whirly	11.89	7.1	8.84	12.42	10.4	7.19	-0.186381	0.735668	No Significant Difference
Unigene26877	Whirly	23.71	15.34	17.28	13.07	13.97	11.9	0.498363	0.186592	No Significant Difference
Unigene24191	WOX	0.16	0	0.05	0.24	0	0.15	#N/A	#N/A	No Significant Difference
Unigene26517	WOX	24.26	17.83	21.95	10.95	15.01	10.28	0.990137	0.000688037	No Significant Difference
Unigene26934	WOX	0.11	0.22	0.05	0.16	0	0.05	#N/A	#N/A	No Significant Difference
Unigene33114	WOX	0	0	0	4.69	0.25	0.71	#N/A	#N/A	No Significant Difference
Unigene41277	WOX	0	0	0	1.19	1.11	1.52	#N/A	#N/A	No Significant Difference
Unigene44734	WOX	4.7	0.62	1.61	6.62	4.58	4.27	-1.28369	0.140434	No Significant Difference
Unigene10130	WRKY	24.01	20.05	22.29	20.99	21.55	21.39	-0.138186	0.660522	No Significant Difference
Unigene10293	WRKY	11.67	14.27	18.95	17.05	21.73	32.3	-0.208547	0.675711	No Significant Difference
Unigene10543	WRKY	0.09	0.29	0.26	0.11	0.48	0.43	#N/A	#N/A	No Significant Difference
Unigene11121	WRKY	27.69	20.47	23.03	25.3	27.64	23.58	0.046562	0.89224	No Significant Difference
Unigene42398	BES1	5.63	23.59	22.4	3.16	6.33	7.6	1.62295	0.0193275	Up
Unigene11701	WRKY	6.69	6.91	8.51	6.35	9.36	9.11	-0.548474	0.0621323	No Significant Difference
Unigene13778	BBR-BPC	26.03	39.72	43.32	13.47	20.05	18.38	1.0009	0.000321893	Up
Unigene11999	WRKY	2.86	3.26	2.92	1.11	1.64	2.04	-0.080268	0.889789	No Significant Difference
Unigene125331	WRKY	0.82	0	0	0.72	0	0.37	#N/A	#N/A	No Significant Difference
Unigene13238	WRKY	2.31	2.17	3.18	1.15	2.47	1.97	0.408657	0.414963	No Significant Difference
Unigene13526	WRKY	8.86	4.99	5.43	5.72	7.07	4.67	0.160676	0.777094	No Significant Difference
Unigene13541	WRKY	1.79	6.39	5.87	5.63	4.67	4.98	-0.155932	0.836951	No Significant Difference
Unigene13795	WRKY	6.43	2.55	5.13	1.92	2.22	4.14	0.467934	0.459205	No Significant Difference
Unigene27755	B3	3.92	5.6	3.69	25.65	7.82	4.84	-1.65613	0.0250266	Down
Unigene14454	WRKY	1.53	3.58	3.61	2.43	1.11	2.22	0.449084	0.481453	No Significant Difference
Unigene14457	WRKY	1.43	1.3	1.95	2.46	1.21	2.67	-0.296929	0.607515	No Significant Difference
Unigene15350	WRKY	2.79	2.26	1.93	4.18	4.31	1.78	-0.422141	0.533658	No Significant Difference
Unigene16533	WRKY	0.63	0.34	0.38	3.01	0.38	0.45	#N/A	#N/A	No Significant Difference
Unigene16535	WRKY	5.08	6.91	10.53	6.03	8.16	9.95	-0.241579	0.595402	No Significant Difference
Unigene17345	WRKY	0.04	0	0.04	3.9	0.49	0.11	#N/A	#N/A	No Significant Difference
Unigene177276	WRKY	1.01	0	1.67	1.71	0	0.86	#N/A	#N/A	No Significant Difference
Unigene17859	WRKY	5.67	6.87	7.93	5.67	9.29	7.64	-0.153951	0.723966	No Significant Difference
Unigene18084	WRKY	3.35	3.95	5.3	2.67	2.92	2.82	0.508645	0.155046	No Significant Difference
Unigene18460	WRKY	28.25	21.5	28.27	23.8	27.22	26.09	-0.354234	0.131487	No Significant Difference
Unigene18616	WRKY	6.04	4.62	6.19	1.64	4.17	3.34	0.785189	0.0860189	No Significant Difference
Unigene19090	WRKY	1.81	2.84	1.93	2.01	2.77	1.07	0.37564	0.499881	No Significant Difference
Unigene19366	WRKY	1.17	1.38	0.52	3.08	2.41	2.26	-1.22506	0.0973397	No Significant Difference
Unigene19600	WRKY	2.16	3.01	3.27	0.98	1.15	2.48	0.575565	0.364627	No Significant Difference
Unigene20119	WRKY	0.09	0.52	1.12	0.17	0.13	0.46	#N/A	#N/A	No Significant Difference
Unigene51196	B3	2.02	1.25	2.22	7.11	11.81	8.32	-2.57349	4.02399e-07	Down
Unigene20443	WRKY	0.63	0.39	1.35	0.67	0.8	0.93	-0.0942495	0.920565	No Significant Difference
Unigene677	B3	4.01	4.56	4.54	2.77	1.25	2.79	1.05861	0.000289564	Up
Unigene22869	WRKY	1.7	1.68	2.6	1.08	1.46	2.31	0.157238	0.818312	No Significant Difference
Unigene24706	WRKY	0	0.06	0	0.44	1.07	1.03	-5.57882	0.000439709	Down
Unigene25100	WRKY	30.15	13.4	15.5	9.94	15.93	13.09	0.438669	0.414451	No Significant Difference
Unigene25634	WRKY	0.05	0	0	0	0	0	#N/A	#N/A	No Significant Difference
Unigene25745	WRKY	0.43	0.57	0.47	0.2	0.25	0.15	#N/A	#N/A	No Significant Difference
Unigene26741	WRKY	3.97	3.48	3.61	3.3	3.54	3.39	-0.491198	0.264991	No Significant Difference
Unigene29053	WRKY	0.42	0.12	0.12	0	0.11	0.23	#N/A	#N/A	No Significant Difference
Unigene29486	WRKY	0.55	0.41	0.53	0.51	0.97	0.52	#N/A	#N/A	No Significant Difference
Unigene2978	WRKY	0.72	0.86	0.95	0.61	0.3	0.02	1.38997	0.190834	No Significant Difference
Unigene67594	B3	3	6.87	7.88	1.51	2.06	2.37	1.49799	0.0167103	Up
Unigene35993	WRKY	0.62	0.08	0.08	0.08	0.81	0.65	#N/A	#N/A	No Significant Difference
Unigene38358	WRKY	0	0.15	0.08	0	0.07	0.22	#N/A	#N/A	No Significant Difference
Unigene4406	ARF	33.06	33.96	42.27	9.16	16.4	22.44	1.08375	0.00247055	Up
Unigene39272	WRKY	21.77	8.78	12.28	9.25	9.13	9.52	-0.0408674	0.947099	No Significant Difference
Unigene43715	WRKY	0	0	0	0.67	0.76	0.94	#N/A	#N/A	No Significant Difference
Unigene45745	WRKY	0	0.09	0	2.13	0.09	1.39	#N/A	#N/A	No Significant Difference
Unigene4884	WRKY	12.93	7.69	13.2	7.82	11.04	19.74	-0.116385	0.843874	No Significant Difference
Unigene49098	WRKY	2.43	5.59	6.85	1.9	5.01	4.62	0.247558	0.76161	No Significant Difference
Unigene5201	WRKY	21.22	30.82	30.1	17.22	17.41	17.78	0.123397	0.631347	No Significant Difference
Unigene52239	WRKY	0.88	0.52	0.63	0.2	0.82	0.41	#N/A	#N/A	No Significant Difference
Unigene5584	WRKY	2.13	8.08	9.6	1.77	2.31	3.7	1.04468	0.0568334	No Significant Difference
Unigene57572	WRKY	0	1.31	0.16	0.45	0.12	0.24	#N/A	#N/A	No Significant Difference
Unigene60173	WRKY	0.13	0.62	0.25	0.12	0.12	0.24	#N/A	#N/A	No Significant Difference
Unigene64626	WRKY	0.28	0	0.46	1.17	0.78	0.53	#N/A	#N/A	No Significant Difference
Unigene64677	WRKY	0	0	0	0.13	0.13	0.26	#N/A	#N/A	No Significant Difference
Unigene65645	WRKY	0.14	0.14	0	1.33	0.8	0.13	#N/A	#N/A	No Significant Difference
Unigene6862	WRKY	13.49	19.5	21.36	11.55	14.07	13.94	-0.0319642	0.912089	No Significant Difference
Unigene10037	ARF	13.65	11.99	12.96	4.47	4.54	3.95	1.12774	0.000800223	Up
Unigene7229	WRKY	15.74	10.02	15.45	3.68	6.36	8.66	0.996169	0.0175396	No Significant Difference
Unigene7477	WRKY	5.01	2.95	2.95	2.18	2.9	3.19	0.0700676	0.904546	No Significant Difference
Unigene7653	WRKY	0.64	1.19	1.09	0.63	1.16	0.82	0.586027	0.363913	No Significant Difference
Unigene7764	WRKY	0.38	0.27	0.33	0.15	0.13	0.18	#N/A	#N/A	No Significant Difference
Unigene8333	WRKY	25.49	22.87	24.71	22.55	29.38	25.65	-0.15001	0.53124	No Significant Difference
Unigene89788	WRKY	0.45	0.41	0.21	0.2	0.6	0	#N/A	#N/A	No Significant Difference
Unigene9394	WRKY	1.91	2.46	3.44	1.68	1.46	3.8	0.325005	0.601437	No Significant Difference
Unigene94080	WRKY	1.14	1.35	0.57	0.55	0.43	0	#N/A	#N/A	No Significant Difference
Unigene102647	YABBY	0	0	0	0.25	0	0	#N/A	#N/A	No Significant Difference
Unigene103355	YABBY	0.28	0	0	0.25	0.25	0	#N/A	#N/A	No Significant Difference
Unigene106436	YABBY	0	0	0	0	0	0	#N/A	#N/A	No Significant Difference
Unigene11926	YABBY	89.43	77.6	84.47	57.06	82.17	90.57	0.00781362	0.983231	No Significant Difference
Unigene131397	YABBY	0	0.77	0	0	0	1.2	#N/A	#N/A	No Significant Difference
Unigene178588	YABBY	0	0	0	0	0	0	#N/A	#N/A	No Significant Difference
Unigene187455	YABBY	0	0	0	0	0	0	#N/A	#N/A	No Significant Difference
Unigene197985	YABBY	1.51	0	0	0	1.17	0	#N/A	#N/A	No Significant Difference
Unigene22743	YABBY	172.35	98.29	101.45	126.47	155.73	215.19	-0.0878309	0.848987	No Significant Difference
Unigene28925	YABBY	27.69	30.27	26.97	13.98	15.19	18.71	0.772521	0.00138355	No Significant Difference
Unigene32476	YABBY	12.48	10.82	11.83	6.08	8.17	9.74	0.500442	0.138702	No Significant Difference
Unigene37353	YABBY	16.15	11.07	22.28	9.78	15.71	12.11	0.244688	0.60307	No Significant Difference
Unigene81684	YABBY	10.49	2.51	5.29	7.61	4.59	3.67	0.14939	0.881902	No Significant Difference
Unigene99520	YABBY	0	0	0	0	0.24	0.48	#N/A	#N/A	No Significant Difference
Unigene123830	ZF-HD	0	1.38	1.78	1.05	0	0.71	#N/A	#N/A	No Significant Difference
Unigene12621	ZF-HD	0.06	0	0.06	0.36	0.14	0.06	#N/A	#N/A	No Significant Difference
Unigene14015	ZF-HD	8.57	10.36	9.21	6.58	6.52	5.83	0.502294	0.0589166	No Significant Difference
Unigene18627	ZF-HD	1.38	1.45	1.85	2.15	3.84	2.92	-0.723808	0.088698	No Significant Difference
Unigene19312	ZF-HD	0.65	1.2	0.96	1.35	0.44	0.77	0.0253311	0.978565	No Significant Difference
Unigene26259	ZF-HD	0.11	0	0.16	0	0.1	0.22	#N/A	#N/A	No Significant Difference
Unigene28997	ZF-HD	0.48	0.49	0.54	2.33	2.49	2.84	-2.73015	2.89198e-05	Down
Unigene32049	ZF-HD	4.09	4.24	4.54	7.05	2.46	0.75	0.205194	0.849108	No Significant Difference
Unigene5665	AP2	3.92	7.68	8.09	12.66	12.58	11.35	-1.33668	9.44893e-06	Down
Unigene48700	ZF-HD	0.12	0.29	0.59	0.23	0.96	1.2	#N/A	#N/A	No Significant Difference
Unigene65511	ZF-HD	3.53	0.22	1.11	1.72	1.9	2.02	#N/A	#N/A	No Significant Difference
Unigene3782	AP2	5.11	32.53	31.65	3.37	3.03	1.32	2.30128	0.0028104	Up
Unigene8524	ZF-HD	627.1	541.07	509.69	860.14	757.57	809.06	-0.355896	0.306396	No Significant Difference
Unigene90547	ZF-HD	0.68	0.21	0.42	0.41	0	0.21	#N/A	#N/A	No Significant Difference
